# Supplementary material for: Genome-Wide Identification and Analysis of NAC Transcription Factor Family in Two Diploid Wild Relatives of Cultivated Sweet Potato Uncovers Potential NAC Genes Related to Drought Tolerance
Source: Front Genet. 2021 Nov 24;12:744220. doi: 10.3389/fgene.2021.744220 (PMC8653416; doi:10.3389/fgene.2021.744220)
Supplement: Supplementary file 8 [file DataSheet1.XLSX]

## Sheet: Sheet1
Supplementary file 1: Ka/Ks ratios and divergence times of the duplicated ItbNAC and ItfNAC genes
Seq_1	Seq_2	Ka	Ks	Ka_Ks	Divergence-Time
ItbNAC67	ItbNAC91	0.237687	0.510796	0.465326	31.9248
ItbNAC40	ItbNAC41	0.0405926	0.0825981	0.491447	5.16238
ItbNAC97	ItbNAC98	0.101051	0.37073	0.272573	23.1706
ItbNAC24	ItbNAC42	0.116945	1.34426	0.0869958	84.0161
ItbNAC80	ItbNAC96	0.125282	1.33778	0.0936489	83.6115
ItbNAC103	ItbNAC23	0.287325	1.51928	0.189119	94.9552
ItbNAC4	ItbNAC43	0.328452	0.911023	0.360531	56.939
ItbNAC30	ItbNAC31	0.0687129	0.131549	0.522337	8.22181
ItbNAC118	ItbNAC89	0.194521	0.627461	0.310013	39.2163
ItbNAC113	ItbNAC25	0.129231	1.12354	0.115021	70.2211
ItbNAC29	ItbNAC63	0.31973	1.31897	0.242409	82.4357
ItbNAC106	ItbNAC107	0.0428153	0.0650373	0.658318	4.06483
ItbNAC117	ItbNAC34	0.112802	0.829503	0.135988	51.8439
ItbNAC73	ItbNAC86	0.171208	0.917556	0.186591	57.3472
ItbNAC27	ItbNAC35	0.221461	1.16019	0.190883	72.5118
ItbNAC127	ItbNAC64	0.234328	1.3421	0.174598	83.881
ItbNAC7	ItbNAC99	0.0713577	1.00635	0.0709078	62.8966
ItfNAC66	ItfNAC9	0.0640288	0.203504	0.314632	12.719
ItfNAC12	ItfNAC99	0.031374	0.086116	0.364322	5.38225
ItfNAC36	ItfNAC53	0.115173	1.32895	0.0866647	83.0594
ItfNAC103	ItfNAC117	0.128753	1.13698	0.113241	71.0615
ItfNAC124	ItfNAC34	0.269173	1.33002	0.202383	83.126
ItfNAC16	ItfNAC54	0.284968	0.834239	0.341591	52.1399
ItfNAC42	ItfNAC43	0.110844	0.190057	0.583216	11.8786
ItfNAC111	ItfNAC140	0.19455	0.768714	0.253084	48.0447
ItfNAC134	ItfNAC37	0.142743	0.999014	0.142884	62.4384
ItfNAC41	ItfNAC74	0.294755	2.23706	0.13176	139.816
ItfNAC127	ItfNAC128	0.0385111	0.107771	0.357341	6.7357
ItfNAC139	ItfNAC48	0.125412	0.880682	0.142403	55.0426
ItfNAC108	ItfNAC92	0.167044	0.900936	0.185411	56.3085
ItfNAC3	ItfNAC49	0.261506	1.40533	0.186081	87.8331
ItfNAC146	ItfNAC75	0.248049	1.15133	0.215445	71.9584
ItfNAC120	ItfNAC21	0.0775598	1.0064	0.0770665	62.9001
ItfNAC46	ItfNAC47	0.0971262	0.110772	0.876812	6.92325
ItfNAC2	ItfNAC89	0.485474	0.925021	0.524825	57.8138
ItbNAC47	ItfNAC59	0.00638387	0.0925583	0.0689713	5.78489
ItbNAC105	ItfNAC126	0.00858554	0.0864264	0.0993393	5.40165
ItbNAC5	ItfNAC17	0.00440908	0.0103227	0.427122	0.645172
ItbNAC11	ItfNAC25	0.00708597	0.0171599	0.412937	1.0725
ItbNAC72	ItfNAC91	0.00112129	0.0606774	0.0184795	3.79234
ItbNAC1	ItfNAC13	0.00982547	0.0796201	0.123404	4.97626
ItbNAC87	ItfNAC109	0.00569155	0.0166327	0.34219	1.03954
ItbNAC44	ItfNAC55	0.00583874	0.0989085	0.0590317	6.18178
ItbNAC128	ItfNAC147	0.0238183	0.0836688	0.284673	5.2293
ItbNAC16	ItfNAC20	0.00391987	0.051826	0.0756353	3.23912
ItbNAC76	ItfNAC95	0.00692366	0.0483649	0.143155	3.0228
ItbNAC51	ItfNAC63	0.0173845	0.0401072	0.43345	2.5067
ItbNAC93	ItfNAC114	0.00341816	0.059952	0.0570149	3.747
ItbNAC46	ItfNAC58	0.00832186	0.0428868	0.194042	2.68043
ItbNAC20	ItfNAC31	0.0131089	0.0441304	0.29705	2.75815
ItbNAC48	ItfNAC60	0.0131404	0.0411156	0.319597	2.56972
ItbNAC50	ItfNAC62	0.00883663	0.0916273	0.096441	5.72671
ItbNAC132	ItfNAC151	0.00421096	0.0372382	0.113082	2.32739
ItbNAC116	ItfNAC138	0.101947	0.0777394	1.3114	4.85871
ItbNAC52	ItfNAC64	0.003698	0.0775938	0.0476585	4.84961
ItbNAC74	ItfNAC93	0.0295094	0.0784498	0.376156	4.90311
ItbNAC13	ItfNAC27	0.0112713	0.0819928	0.137467	5.12455
ItbNAC69	ItfNAC88	0.00779531	0.0491308	0.158665	3.07067
ItbNAC112	ItfNAC133	0.018931	0.0366009	0.517228	2.28756
ItbNAC111	ItfNAC132	0.00853321	0.0615279	0.138688	3.84549
ItbNAC56	ItfNAC68	0.00920257	0.0830635	0.11079	5.19147
ItbNAC6	ItfNAC18	0.036901	0.055185	0.668677	3.44906
ItbNAC65	ItfNAC76	0.0190408	0.0775312	0.24559	4.8457
ItbNAC92	ItfNAC112	0.0233912	0.0370937	0.630598	2.31835
ItbNAC14	ItfNAC28	0.00128755	0.0492714	0.0261318	3.07947
ItbNAC12	ItfNAC26	0.192936	0.368894	0.523011	23.0559
ItbNAC104	ItfNAC125	0.0150967	0.0853597	0.17686	5.33498
ItbNAC79	ItfNAC102	0.0116256	0.0228851	0.508001	1.43032
ItbNAC21	ItfNAC32	0.00367273	0.0569201	0.0645243	3.55751
ItbNAC94	ItfNAC115	0.00559378	0.016439	0.340275	1.02744
ItbNAC84	ItfNAC107	0.00688473	0.0161877	0.425307	1.01173
ItbNAC119	ItfNAC141	0.049742	0.0816706	0.609056	5.10441
ItbNAC49	ItfNAC61	0.00570616	0.0731568	0.0779991	4.5723
ItbNAC82	ItfNAC105	0.019601	0.0574719	0.341053	3.59199
ItbNAC68	ItfNAC87	0.00258677	0.0322878	0.0801158	2.01799
ItbNAC75	ItfNAC94	0.0184625	0.0728076	0.253579	4.55048
ItbNAC81	ItfNAC104	0.00289646	0.0652039	0.0444215	4.07525
ItbNAC101	ItfNAC122	0.0106439	0.0339681	0.313349	2.123
ItbNAC2	ItfNAC14	0.00256137	0.0477385	0.0536542	2.98365
ItbNAC15	ItfNAC29	0.00372402	0.0621688	0.0599017	3.88555
ItbNAC114	ItfNAC135	0.0078285	0.0065271	1.19938	0.407944
ItbNAC61	ItfNAC72	0.0164315	0.0294426	0.558086	1.84016
ItbNAC55	ItfNAC67	0.0106827	0.0966854	0.110489	6.04284
ItbNAC9	ItfNAC23	0.00301432	0.0447477	0.0673627	2.79673
ItbNAC22	ItfNAC33	0.00337553	0.0636834	0.0530049	3.98021
ItbNAC115	ItfNAC136	0.0100884	0.0478631	0.210777	2.99145
ItbNAC3	ItfNAC15	0	0.0325548	0	2.03468
ItbNAC32	ItfNAC44	0.0153779	0.0416636	0.369096	2.60398
ItbNAC8	ItfNAC22	0.00160406	0.0344064	0.0466211	2.1504
ItbNAC102	ItfNAC123	0.0172369	0.0463881	0.37158	2.89926
ItbNAC10	ItfNAC24	0.00147059	0.0630845	0.0233114	3.94278
ItbNAC100	ItfNAC121	0.00176835	0.0616997	0.0286605	3.85623
ItbNAC131	ItfNAC150	0.0225598	0.0555667	0.405995	3.47292
ItbNAC18	ItfNAC30	0.0111082	0.0476193	0.233272	2.97621
ItbNAC129	ItfNAC148	0.0528134	0.0948459	0.556834	5.92787
ItbNAC53	ItfNAC65	0.00983755	0.0573619	0.1715	3.58512
ItbNAC83	ItfNAC106	0.00953908	0.040642	0.23471	2.54012
ItbNAC95	ItfNAC116	0.0414226	0.0862081	0.480496	5.388
ItbNAC28	ItfNAC40	0.0074258	0.0582303	0.127525	3.63939
ItbNAC17	ItfNAC19	0.00264143	0.0726961	0.0363352	4.54351
ItbNAC62	ItfNAC73	0.0157057	0.0621622	0.252656	3.88514
ItbNAC110	ItfNAC130	0.0144263	0.0574341	0.25118	3.58963
ItbNAC57	ItfNAC69	0.0336656	0.0871105	0.38647	5.44441
ItbNAC60	ItfNAC71	0.0942906	0.173944	0.542074	10.8715
ItbNAC33	ItfNAC45	0.0264754	0.0560781	0.472117	3.50488
ItbNAC58	ItfNAC70	0.023822	0.0477108	0.4993	2.98193
ItbNAC130	ItfNAC149	0.0330843	0.066882	0.494667	4.18012
ItbNAC71	ItfNAC90	0.0102453	0.064527	0.158776	4.03294

## Sheet: sheet2
Supplementary file 2：Gene interaction network in ItbNACs
ItbNAC name	Interaction gene ID	P value	correlation coefficients (R)
ItbNAC44	itb02g09220.t10	3.59676e-17	0.99099
ItbNAC44	itb07g07770.t1	4.32489e-19	0.994495
ItbNAC44	itb03g10610.t1	8.42749e-18	0.992336
ItbNAC44	itb09g28220.t1	2.4321e-25	0.998889
ItbNAC44	itb08g06470.t5	2.53602e-19	0.994812
ItbNAC44	itb03g02560.t1	5.35748e-17	0.990581
ItbNAC44	itb01g19230.t1	2.4321e-25	0.998889
ItbNAC44	itb09g01620.t2	7.95398e-23	0.997886
ItbNAC44	itb03g00890.t1	8.75861e-19	0.994045
ItbNAC44	itb03g08840.t2	1.5547e-22	0.997722
ItbNAC44	itb05g08290.t2	2.60844e-25	0.998881
ItbNAC44	itb09g17940.t1	1.75118e-21	0.997018
ItbNAC44	itb05g01560.t2	4.06574e-25	0.998824
ItbNAC44	itb04g05220.t2	2.49747e-25	0.998886
ItbNAC44	itb06g11250.t2	2.4321e-25	0.998889
ItbNAC44	itb15g11540.t1	2.4321e-25	0.998889
ItbNAC44	itb07g10810.t1	2.4321e-25	0.998889
ItbNAC44	itb03g16670.t1	5.20152e-25	0.998791
ItbNAC44	itb04g09490.t1	5.97468e-18	0.992624
ItbNAC44	itb07g12110.t1	1.27534e-17	0.991974
ItbNAC44	itb06g05900.t1	2.65666e-20	0.995964
ItbNAC44	itb09g15270.t1	3.07584e-24	0.998527
ItbNAC44	itb13g08140.t1	2.4321e-25	0.998889
ItbNAC44	itb04g21980.t1	5.09455e-25	0.998794
ItbNAC44	itb09g12120.t1	4.36267e-17	0.990794
ItbNAC44	itb08g15720.t1	2.54705e-25	0.998884
ItbNAC44	itb07g21050.t3	2.43203e-25	0.998889
ItbNAC44	itb08g07530.t3	2.43262e-25	0.998889
ItbNAC44	itb05g19180.t1	1.12137e-25	0.998981
ItbNAC44	itb06g15210.t1	9.91963e-21	0.996383
ItbNAC44	itb02g14660.t2	1.17304e-21	0.997148
ItbNAC44	itb03g10300.t2	2.9409e-19	0.994726
ItbNAC44	itb11g09710.t2	2.39626e-25	0.998891
ItbNAC44	itb09g30870.t1	9.2912e-22	0.997221
ItbNAC44	itb10g15910.t5	2.17805e-23	0.998169
ItbNAC44	itb13g20450.t11	2.46177e-25	0.998888
ItbNAC44	itb08g04670.t1	2.4321e-25	0.998889
ItbNAC44	itb04g09800.t1	2.4321e-25	0.998889
ItbNAC44	itb13g23580.t5	2.68191e-25	0.998877
ItbNAC44	itb06g19250.t7	8.47297e-23	0.997871
ItbNAC44	itb02g21060.t1	2.4321e-25	0.998889
ItbNAC44	itb02g05300.t2	9.70098e-22	0.997208
ItbNAC44	itb12g27580.t1	8.61379e-19	0.994056
ItbNAC44	itb13g13980.t1	2.4321e-25	0.998889
ItbNAC44	itb09g07590.t1	2.78214e-22	0.99757
ItbNAC44	itb11g20390.t1	2.4321e-25	0.998889
ItbNAC44	itb14g07170.t4	3.02539e-25	0.998862
ItbNAC44	itb04g05440.t2	3.44838e-23	0.998073
ItbNAC44	itb04g03050.t1	2.47417e-19	0.994827
ItbNAC44	itb06g02020.t1	2.4321e-25	0.998889
ItbNAC44	itb06g19250.t1	3.30349e-23	0.998083
ItbNAC44	itb01g03170.t3	4.67187e-18	0.992824
ItbNAC44	itb04g30920.t1	2.4321e-25	0.998889
ItbNAC44	itb06g23290.t1	2.4321e-25	0.998889
ItbNAC44	itb05g06890.t1	2.4321e-25	0.998889
ItbNAC44	itb06g07170.t1	7.7971e-20	0.995451
ItbNAC44	itb01g20700.t1	4.11863e-22	0.997462
ItbNAC44	itb03g05650.t2	1.12257e-19	0.995262
ItbNAC44	itb08g02670.t2	8.8819e-23	0.99786
ItbNAC44	itb08g05560.t4	1.96113e-17	0.991579
ItbNAC44	itb15g09040.t2	2.17614e-24	0.998583
ItbNAC44	itb09g30950.t1	1.33015e-23	0.998267
ItbNAC44	itb10g21870.t1	9.23464e-18	0.992257
ItbNAC44	itb05g01490.t1	3.77879e-22	0.997486
ItbNAC44	itb04g30110.t1	3.39312e-23	0.998077
ItbNAC44	itb14g04390.t2	2.30333e-25	0.998896
ItbNAC44	itb08g06530.t1	2.26887e-21	0.996931
ItbNAC44	itb03g20240.t1	2.88262e-24	0.998538
ItbNAC44	itb15g02770.t3	1.5096e-18	0.993672
ItbNAC44	itb13g10090.t2	2.4321e-25	0.998889
ItbNAC44	itb07g02200.t7	5.55605e-17	0.990542
ItbNAC44	itb05g16360.t3	2.824e-22	0.997566
ItbNAC44	itb03g25200.t1	4.88437e-24	0.99845
ItbNAC44	itb04g25350.t1	2.51955e-20	0.995988
ItbNAC44	itb05g16690.t5	9.09903e-23	0.997854
ItbNAC44	itb02g13620.t5	5.22697e-25	0.998791
ItbNAC44	itb04g15940.t1	1.41897e-26	0.99919
ItbNAC44	itb04g24890.t1	1.21715e-23	0.998284
ItbNAC44	itb07g20210.t1	2.4321e-25	0.998889
ItbNAC44	itb11g08110.t1	1.84352e-24	0.998609
ItbNAC44	itb06g12920.t1	2.4321e-25	0.998889
ItbNAC44	itb01g12780.t1	2.4321e-25	0.998889
ItbNAC44	itb08g05230.t1	1.09174e-17	0.992112
ItbNAC44	itb10g03610.t1	1.70593e-25	23:58:27.750000
ItbNAC44	itb13g21340.t1	2.4321e-25	0.998889
ItbNAC44	itb15g17850.t1	2.4321e-25	0.998889
ItbNAC44	itb12g17550.t1	2.4321e-25	0.998889
ItbNAC44	itb13g18160.t1	5.40326e-22	0.997384
ItbNAC44	itb14g15970.t1	4.51329e-17	0.990759
ItbNAC44	itb12g19680.t1	6.96594e-26	0.999033
ItbNAC44	itb14g19180.t1	2.4321e-25	0.998889
ItbNAC44	itb14g16430.t2	2.43982e-25	0.998889
ItbNAC44	itb08g16170.t1	2.44019e-25	0.998889
ItbNAC44	itb15g20500.t1	2.4321e-25	0.998889
ItbNAC44	itb11g11880.t5	6.89604e-21	0.996527
ItbNAC44	itb08g07590.t4	3.1674e-23	0.998092
ItbNAC44	itb10g11690.t1	2.4321e-25	0.998889
ItbNAC44	itb13g26460.t1	5.42543e-19	0.994354
ItbNAC44	itb15g11810.t3	4.59653e-20	0.995711
ItbNAC44	itb01g31390.t1	2.4321e-25	0.998889
ItbNAC44	itb06g04290.t1	1.09369e-23	0.998304
ItbNAC44	itb08g08160.t1	6.45152e-18	0.992561
ItbNAC44	itb04g05620.t1	2.4321e-25	0.998889
ItbNAC44	itb05g21390.t1	2.4321e-25	0.998889
ItbNAC44	itb15g13820.t1	2.4321e-25	0.998889
ItbNAC44	itb04g16540.t2	4.08643e-19	0.994529
ItbNAC44	itb11g07010.t1	1.53537e-22	0.997725
ItbNAC44	itb05g16360.t7	3.0376e-18	0.99316
ItbNAC44	itb03g04220.t1	5.96459e-18	0.992626
ItbNAC44	itb04g22440.t2	9.71923e-21	0.996392
ItbNAC44	itb04g30070.t1	2.4321e-25	0.998889
ItbNAC44	itb03g25650.t1	1.02283e-21	0.997191
ItbNAC44	itb08g07670.t2	2.60016e-19	0.994798
ItbNAC44	itb02g13400.t1	7.39921e-18	0.992446
ItbNAC44	itb13g15330.t2	6.3807e-25	0.998764
ItbNAC44	itb02g15250.t4	1.26249e-18	0.993797
ItbNAC44	itb06g12880.t3	5.62025e-30	0.999661
ItbNAC44	itb12g00690.t2	1.20987e-18	0.993826
ItbNAC44	itb07g04230.t3	3.32943e-18	0.993089
ItbNAC44	itb09g08310.t4	2.43259e-25	0.998889
ItbNAC44	itb15g10710.t1	1.05567e-17	0.992141
ItbNAC44	itb12g09120.t2	2.65872e-25	0.998878
ItbNAC44	itb05g02000.t1	9.61304e-19	0.993983
ItbNAC44	itb05g18590.t1	4.19476e-24	0.998476
ItbNAC44	ItbNAC50	1.01598e-20	0.996374
ItbNAC44	itb01g24280.t1	3.3177e-25	0.99885
ItbNAC44	itb14g18270.t2	2.48564e-25	0.998887
ItbNAC44	itb06g13750.t1	4.40043e-18	0.992871
ItbNAC44	itb07g23330.t1	2.4321e-25	0.998889
ItbNAC44	itb06g06710.t2	2.43709e-25	0.998889
ItbNAC44	itb08g16490.t3	8.44944e-25	0.998724
ItbNAC44	itb04g07840.t5	7.46931e-23	0.997901
ItbNAC44	itb07g22690.t2	1.40496e-24	0.99865
ItbNAC44	itb10g02470.t1	9.01647e-17	0.990018
ItbNAC44	itb03g18800.t5	1.21039e-24	0.998672
ItbNAC44	itb08g00910.t1	1.30893e-20	0.99627
ItbNAC44	itb05g18080.t1	2.4321e-25	0.998889
ItbNAC44	itb10g23520.t2	2.34071e-18	0.993355
ItbNAC44	itb04g03720.t1	5.62645e-19	0.994331
ItbNAC44	itb12g16050.t1	2.4321e-25	0.998889
ItbNAC44	itb08g13120.t1	1.49706e-26	0.999185
ItbNAC44	itb13g23430.t1	6.80621e-17	0.990326
ItbNAC44	itb14g21680.t1	8.32935e-18	0.992346
ItbNAC44	itb08g06470.t3	5.97383e-22	0.997354
ItbNAC44	itb01g29080.t1	2.8727e-23	0.998112
ItbNAC44	itb05g24510.t4	2.4321e-25	0.998889
ItbNAC44	itb04g04140.t4	1.11017e-22	0.997806
ItbNAC44	itb03g23720.t1	2.57935e-25	0.998882
ItbNAC44	itb06g07210.t1	1.31714e-17	0.991945
ItbNAC44	itb10g23030.t1	1.33353e-24	0.998658
ItbNAC44	itb15g04220.t2	3.24337e-25	0.998853
ItbNAC44	itb08g08770.t1	2.4321e-25	0.998889
ItbNAC44	itb02g10910.t1	1.58434e-24	0.998632
ItbNAC44	itb04g09450.t2	5.45063e-25	0.998785
ItbNAC44	itb14g21740.t1	2.61248e-25	0.99888
ItbNAC44	itb09g26250.t5	2.3287e-25	0.998895
ItbNAC44	itb10g23920.t6	2.43625e-25	0.998889
ItbNAC44	itb07g24020.t1	1.2912e-19	0.995188
ItbNAC44	itb02g14460.t3	8.63876e-23	0.997866
ItbNAC44	itb12g09130.t1	1.32843e-23	0.998267
ItbNAC44	itb10g25260.t1	3.14128e-18	0.993134
ItbNAC44	itb05g09020.t1	2.4321e-25	0.998889
ItbNAC44	itb03g10300.t1	1.97995e-17	0.99157
ItbNAC44	itb02g00080.t1	2.24385e-25	0.998899
ItbNAC44	itb05g28240.t1	4.03895e-25	0.998825
ItbNAC44	itb14g07330.t4	1.31177e-20	0.996269
ItbNAC44	itb07g02810.t1	2.33715e-20	0.996022
ItbNAC44	itb04g09450.t5	2.4389e-25	0.998889
ItbNAC44	itb03g08840.t4	3.39785e-17	0.991047
ItbNAC44	itb11g07260.t1	5.76777e-18	0.992653
ItbNAC44	itb06g00770.t1	2.4321e-25	0.998889
ItbNAC44	itb13g03720.t3	2.92337e-25	0.998866
ItbNAC44	itb10g00660.t5	4.65621e-22	0.997427
ItbNAC44	itb08g04370.t1	2.38241e-23	0.998151
ItbNAC44	itb09g17960.t1	2.523e-24	0.998559
ItbNAC44	itb02g26160.t9	3.42824e-25	0.998846
ItbNAC44	itb11g02300.t1	1.34559e-17	0.991926
ItbNAC44	itb05g28460.t1	2.4321e-25	0.998889
ItbNAC44	itb05g20810.t1	1.95067e-18	0.993489
ItbNAC44	itb04g25780.t2	6.98031e-19	0.994193
ItbNAC44	itb04g16430.t2	2.52108e-25	0.998885
ItbNAC44	itb01g29720.t2	2.47602e-25	0.998887
ItbNAC44	itb12g19680.t3	1.4157e-26	0.99919
ItbNAC44	itb04g29220.t1	2.4321e-25	0.998889
ItbNAC44	itb02g11270.t5	7.68439e-26	0.999023
ItbNAC44	itb11g14610.t1	7.57031e-24	0.998372
ItbNAC44	itb15g18150.t1	2.4321e-25	0.998889
ItbNAC44	itb01g13080.t1	6.21575e-20	0.995564
ItbNAC44	itb05g16360.t1	2.52418e-25	0.998885
ItbNAC44	itb06g12880.t1	4.68182e-25	0.998805
ItbNAC44	itb08g15210.t1	2.54351e-25	0.998884
ItbNAC44	itb08g07590.t2	1.35958e-23	0.998263
ItbNAC44	itb14g07300.t7	2.28318e-20	0.996032
ItbNAC44	itb12g28390.t1	2.4321e-25	0.998889
ItbNAC44	itb13g04020.t1	1.96463e-22	0.997662
ItbNAC44	itb04g09450.t3	2.4321e-25	0.998889
ItbNAC44	itb09g03740.t1	8.60344e-26	0.999011
ItbNAC44	itb15g21970.t1	6.92193e-20	0.995511
ItbNAC44	itb12g17690.t2	2.1475e-23	0.998172
ItbNAC44	itb11g03490.t4	2.13259e-27	0.999344
ItbNAC44	itb15g16480.t1	2.4321e-25	0.998889
ItbNAC44	itb15g20500.t2	2.4321e-25	0.998889
ItbNAC44	itb13g19570.t3	3.0765e-25	0.99886
ItbNAC44	itb10g20110.t2	3.07183e-17	0.991147
ItbNAC44	itb02g11840.t1	1.27793e-23	0.998275
ItbNAC44	itb09g12420.t5	2.28741e-21	0.996928
ItbNAC44	itb08g02400.t7	6.08986e-17	0.990445
ItbNAC44	itb01g31080.t1	2.4321e-25	0.998889
ItbNAC44	itb09g07180.t2	2.43042e-25	0.998889
ItbNAC44	itb10g26170.t1	2.4321e-25	0.998889
ItbNAC44	itb10g07720.t1	2.4321e-25	0.998889
ItbNAC44	itb08g14580.t1	2.4321e-25	0.998889
ItbNAC44	itb04g23810.t1	2.4321e-25	0.998889
ItbNAC44	itb05g23420.t1	2.43236e-25	0.998889
ItbNAC44	itb14g19320.t1	3.37776e-25	0.998848
ItbNAC44	itb09g04890.t1	2.4321e-25	0.998889
ItbNAC44	itb10g15910.t4	6.59531e-24	0.998397
ItbNAC44	itb15g08560.t1	1.70252e-23	0.998219
ItbNAC44	itb09g26250.t2	1.05346e-25	0.998988
ItbNAC44	itb12g13150.t2	3.4154e-20	0.99585
ItbNAC44	itb15g00310.t1	6.63801e-23	0.997928
ItbNAC44	itb14g16590.t1	2.02705e-23	0.998184
ItbNAC44	itb01g11590.t1	4.96617e-24	0.998447
ItbNAC44	itb09g26130.t1	2.4321e-25	0.998889
ItbNAC44	itb03g21250.t1	1.91134e-18	0.993504
ItbNAC44	itb13g21390.t1	1.04377e-21	0.997185
ItbNAC44	itb03g27370.t1	1.84462e-17	0.991637
ItbNAC44	itb01g17750.t1	2.35157e-19	0.994856
ItbNAC44	itb02g16750.t1	9.54545e-21	0.996399
ItbNAC44	itb05g23020.t1	3.79161e-18	0.992989
ItbNAC44	itb02g10740.t1	2.34846e-20	0.996019
ItbNAC44	itb13g03720.t1	6.07462e-23	0.997948
ItbNAC44	itb14g21350.t1	2.43411e-25	0.998889
ItbNAC44	itb01g35970.t1	1.49047e-24	0.998641
ItbNAC44	itb12g00330.t3	2.46554e-25	0.998888
ItbNAC44	itb02g13210.t3	2.43195e-17	0.991375
ItbNAC44	itb13g06140.t1	1.59538e-18	0.993633
ItbNAC44	itb04g29370.t1	1.41457e-17	0.99188
ItbNAC44	itb13g14850.t5	2.4321e-25	0.998889
ItbNAC44	itb02g09560.t1	2.62269e-23	0.998131
ItbNAC44	ItbNAC75	2.4321e-25	0.998889
ItbNAC44	itb03g14690.t1	1.01338e-18	0.993947
ItbNAC44	itb12g19680.t2	3.41933e-18	0.993069
ItbNAC44	itb12g26910.t2	8.59458e-21	0.996441
ItbNAC44	itb12g23270.t2	4.58053e-21	0.996681
ItbNAC44	itb05g27220.t1	6.48685e-23	0.997933
ItbNAC44	itb04g10610.t1	1.01982e-19	0.995313
ItbNAC44	itb10g04220.t1	3.1711e-21	0.996814
ItbNAC44	itb11g03490.t3	1.98518e-24	0.998597
ItbNAC44	itb09g14620.t3	1.951e-21	0.996982
ItbNAC44	itb12g13140.t1	4.22443e-27	0.999292
ItbNAC44	itb01g16770.t3	1.29613e-22	0.997768
ItbNAC44	itb13g20450.t18	1.59987e-25	0.99894
ItbNAC44	itb12g27890.t2	2.3386e-25	0.998894
ItbNAC44	itb05g01560.t1	3.49031e-25	0.998844
ItbNAC44	itb13g13530.t1	2.44338e-19	0.994834
ItbNAC44	itb05g16290.t1	5.68607e-19	0.994324
ItbNAC44	itb06g15440.t3	2.42067e-25	0.99889
ItbNAC44	itb05g17170.t5	2.65628e-25	0.998878
ItbNAC44	itb10g02270.t1	2.4321e-25	0.998889
ItbNAC44	itb04g24640.t2	2.45019e-25	0.998888
ItbNAC44	itb08g11240.t1	2.4321e-25	0.998889
ItbNAC44	itb09g03870.t6	2.45499e-25	0.998888
ItbNAC44	itb03g25860.t1	2.4321e-25	0.998889
ItbNAC44	itb03g06630.t1	2.4321e-25	0.998889
ItbNAC44	itb03g09530.t1	2.4321e-25	0.998889
ItbNAC44	itb09g14620.t4	1.20962e-18	0.993827
ItbNAC44	itb10g00660.t3	7.11832e-20	0.995497
ItbNAC44	itb10g18110.t1	2.4321e-25	0.998889
ItbNAC44	itb02g05190.t1	6.37209e-20	0.995552
ItbNAC44	itb11g11210.t1	1.32774e-19	0.995173
ItbNAC44	itb07g23160.t1	2.4321e-25	0.998889
ItbNAC44	itb09g09960.t1	8.35363e-19	0.994076
ItbNAC44	itb05g26420.t2	2.38976e-25	0.998892
ItbNAC44	itb01g12500.t1	7.19431e-18	0.99247
ItbNAC44	itb03g07880.t1	4.61041e-22	0.997429
ItbNAC44	itb13g08120.t1	2.4321e-25	0.998889
ItbNAC44	itb04g29040.t8	2.43319e-25	0.998889
ItbNAC44	itb14g03610.t1	1.69402e-23	0.99822
ItbNAC44	itb10g18480.t1	1.8199e-23	0.998206
ItbNAC44	itb01g33160.t1	1.16574e-20	0.996318
ItbNAC44	itb09g17940.t2	3.2719e-20	0.99587
ItbNAC44	itb08g05580.t1	1.94411e-18	0.993491
ItbNAC44	itb11g05480.t1	4.43291e-26	0.999081
ItbNAC44	itb07g04990.t1	4.19358e-18	0.992909
ItbNAC44	itb09g01720.t2	2.54977e-25	0.998884
ItbNAC44	itb10g02630.t1	5.10553e-23	0.997987
ItbNAC44	itb07g22080.t2	2.31484e-25	0.998895
ItbNAC44	itb13g03720.t4	2.436e-25	0.998889
ItbNAC44	itb06g19250.t4	4.25779e-20	0.995747
ItbNAC44	itb10g19900.t1	3.65825e-20	0.995818
ItbNAC44	itb08g06470.t4	5.41033e-20	0.995632
ItbNAC44	itb06g06710.t3	2.42879e-25	0.99889
ItbNAC44	itb05g24860.t1	6.8759e-19	0.994203
ItbNAC44	itb10g15910.t1	1.51666e-25	0.998946
ItbNAC44	itb12g13850.t3	4.23305e-25	0.998819
ItbNAC44	itb13g02510.t1	2.44312e-20	0.996002
ItbNAC44	itb10g12690.t1	6.96333e-21	0.996523
ItbNAC44	itb01g07300.t1	2.03044e-22	0.997654
ItbNAC44	itb09g10130.t1	2.4321e-25	0.998889
ItbNAC44	itb04g08710.t3	2.43223e-25	0.998889
ItbNAC44	itb10g02640.t1	5.679e-27	0.999269
ItbNAC44	itb09g12390.t1	2.4321e-25	0.998889
ItbNAC44	itb04g30620.t1	3.42589e-27	0.999308
ItbNAC44	itb04g29380.t1	4.40639e-21	0.996696
ItbNAC44	itb05g00420.t1	7.37165e-20	0.995479
ItbNAC44	itb07g07200.t2	3.34957e-19	0.994649
ItbNAC44	itb03g10850.t5	1.77448e-21	0.997014
ItbNAC44	itb07g17430.t1	2.4321e-25	0.998889
ItbNAC44	itb13g00790.t1	5.0753e-23	0.997989
ItbNAC44	itb01g35410.t1	1.52318e-25	0.998946
ItbNAC44	itb12g00690.t1	3.38453e-19	0.994643
ItbNAC44	itb14g03440.t2	6.54974e-20	0.995538
ItbNAC44	itb03g10610.t2	5.11426e-25	0.998794
ItbNAC44	itb14g15640.t2	1.6855e-22	0.997702
ItbNAC44	itb08g05180.t1	1.18955e-18	0.993838
ItbNAC44	itb05g18730.t4	8.12008e-25	0.99873
ItbNAC44	itb08g08910.t2	2.43222e-25	0.998889
ItbNAC44	itb11g12240.t1	4.95306e-22	0.997409
ItbNAC44	itb13g20450.t17	2.53009e-25	0.998884
ItbNAC44	itb12g27890.t5	2.47683e-25	0.998887
ItbNAC44	itb10g02550.t1	1.0754e-19	0.995285
ItbNAC44	itb10g23480.t3	2.79086e-23	0.998118
ItbNAC44	itb04g31940.t1	2.80806e-18	0.993219
ItbNAC44	itb12g16170.t1	2.4321e-25	0.998889
ItbNAC44	itb13g20450.t7	2.04917e-25	0.99891
ItbNAC44	itb12g19180.t1	2.4321e-25	0.998889
ItbNAC44	itb02g03900.t1	6.20334e-23	0.997943
ItbNAC44	itb15g03300.t4	1.78652e-17	0.991666
ItbNAC44	itb03g01170.t3	7.11774e-25	0.998749
ItbNAC44	itb11g07020.t2	9.86743e-18	0.9922
ItbNAC44	itb09g29110.t1	1.66092e-21	0.997036
ItbNAC44	itb05g01370.t2	1.35379e-22	0.997757
ItbNAC44	itb02g00070.t1	2.4321e-25	0.998889
ItbNAC44	itb03g01600.t1	1.58722e-19	0.995076
ItbNAC44	itb08g02400.t2	6.31953e-24	0.998405
ItbNAC44	itb15g12060.t2	2.89978e-20	0.995925
ItbNAC44	itb03g09220.t3	6.02169e-19	0.994288
ItbNAC44	itb12g27890.t1	2.37544e-23	0.998152
ItbNAC44	itb12g27130.t6	2.4321e-25	0.998889
ItbNAC44	itb01g10670.t1	2.82776e-25	0.998871
ItbNAC44	itb01g03740.t1	1.84724e-19	0.994992
ItbNAC44	itb09g07680.t1	2.12802e-25	0.998906
ItbNAC44	itb04g28960.t1	1.55503e-25	0.998943
ItbNAC44	itb11g03490.t6	2.3401e-25	0.998894
ItbNAC44	itb01g10670.t2	2.43215e-25	0.998889
ItbNAC44	itb14g11440.t2	1.81277e-24	0.998611
ItbNAC44	itb04g06720.t4	8.20096e-18	0.992359
ItbNAC44	itb04g07340.t1	1.7873e-23	0.998209
ItbNAC44	itb02g09220.t2	2.9366e-19	0.994727
ItbNAC44	itb02g06800.t1	1.66066e-21	0.997036
ItbNAC44	itb07g09100.t1	2.4321e-25	0.998889
ItbNAC44	itb12g13220.t2	4.59409e-26	0.999077
ItbNAC44	itb09g18090.t1	2.39126e-25	0.998891
ItbNAC44	itb02g10480.t2	7.46574e-25	0.998742
ItbNAC44	itb06g16750.t1	4.21369e-23	0.99803
ItbNAC44	itb07g24310.t7	4.15449e-19	0.994519
ItbNAC44	itb09g08030.t1	2.29879e-17	0.991429
ItbNAC44	itb11g14610.t2	1.21765e-19	0.995219
ItbNAC44	itb11g19670.t1	2.4321e-25	0.998889
ItbNAC44	itb05g16360.t2	4.80976e-19	0.994429
ItbNAC44	itb06g00590.t2	3.53735e-24	0.998504
ItbNAC44	itb02g12380.t2	2.55847e-25	0.998883
ItbNAC44	itb01g10580.t2	1.15379e-20	0.996322
ItbNAC44	itb11g11670.t2	2.43468e-25	0.998889
ItbNAC44	itb09g02680.t1	1.23963e-24	0.998669
ItbNAC44	itb10g02540.t1	1.72196e-29	0.999616
ItbNAC44	itb06g03830.t1	4.30802e-24	0.998471
ItbNAC44	itb10g11320.t2	3.5185e-25	0.998843
ItbNAC44	itb02g12620.t2	2.49387e-25	0.998886
ItbNAC44	itb07g02200.t4	1.51133e-18	0.993671
ItbNAC44	itb05g12970.t1	2.4321e-25	0.998889
ItbNAC44	itb07g08620.t1	2.57911e-20	0.995978
ItbNAC44	itb09g13200.t1	3.33936e-26	0.999109
ItbNAC44	itb04g29870.t1	3.71645e-24	0.998496
ItbNAC44	itb12g01080.t1	2.26448e-25	0.998898
ItbNAC44	itb01g27350.t1	3.32436e-20	0.995863
ItbNAC44	itb03g06630.t2	2.4321e-25	0.998889
ItbNAC44	itb09g07250.t1	1.88912e-17	0.991614
ItbNAC44	itb12g27130.t2	2.43211e-25	0.998889
ItbNAC44	itb02g14880.t1	5.07366e-17	0.990638
ItbNAC44	itb13g22050.t1	9.50452e-21	0.996401
ItbNAC44	itb07g18280.t1	2.4321e-25	0.998889
ItbNAC44	itb11g01900.t2	6.50927e-18	0.992553
ItbNAC44	itb15g11810.t2	3.7061e-21	0.996759
ItbNAC44	itb14g01350.t3	2.43275e-25	0.998889
ItbNAC44	itb07g23150.t1	2.4321e-25	0.998889
ItbNAC44	itb12g23900.t3	2.43084e-25	0.998889
ItbNAC44	itb05g27940.t1	8.98615e-23	0.997857
ItbNAC44	itb08g08060.t2	1.1813e-23	0.99829
ItbNAC44	itb01g11590.t2	3.70877e-25	0.998836
ItbNAC44	itb03g25650.t2	4.99112e-23	0.997993
ItbNAC44	itb08g06470.t1	1.7302e-17	0.991696
ItbNAC44	itb01g19240.t1	2.4321e-25	0.998889
ItbNAC44	itb11g03490.t7	1.90839e-21	0.996989
ItbNAC44	itb06g22040.t4	2.18083e-25	0.998903
ItbNAC44	itb15g22920.t1	2.4321e-25	0.998889
ItbNAC44	itb06g05550.t11	2.4321e-25	0.998889
ItbNAC44	itb15g16570.t1	2.4321e-25	0.998889
ItbNAC44	itb03g23360.t1	2.4321e-25	0.998889
ItbNAC44	itb03g18300.t2	2.4321e-25	0.998889
ItbNAC44	itb08g02400.t4	3.83085e-20	0.995797
ItbNAC44	itb09g01620.t1	1.54634e-20	0.9962
ItbNAC44	itb09g30890.t1	2.74456e-28	0.999478
ItbNAC44	itb01g06320.t1	1.9966e-28	0.999496
ItbNAC44	itb12g13180.t1	2.4321e-25	0.998889
ItbNAC44	itb04g28980.t1	2.4321e-25	0.998889
ItbNAC44	itb09g10720.t2	1.79362e-17	0.991663
ItbNAC44	itb01g30550.t1	2.43538e-25	0.998889
ItbNAC44	itb09g18750.t1	4.98488e-21	0.99665
ItbNAC44	itb02g10910.t2	1.29002e-27	0.99938
ItbNAC44	itb12g25560.t1	2.4321e-25	0.998889
ItbNAC44	itb15g22080.t2	1.92982e-25	0.998918
ItbNAC44	itb12g27890.t3	1.0715e-17	0.992128
ItbNAC44	itb01g03180.t1	2.4321e-25	0.998889
ItbNAC44	itb04g08030.t2	6.30728e-21	0.996561
ItbNAC44	itb06g21950.t1	4.75029e-19	0.994437
ItbNAC44	itb01g18010.t1	2.4321e-25	0.998889
ItbNAC44	itb04g11470.t1	2.4321e-25	0.998889
ItbNAC44	itb12g05560.t1	2.4321e-25	0.998889
ItbNAC44	itb14g18450.t1	2.4321e-25	0.998889
ItbNAC44	itb06g11670.t1	2.83926e-18	0.993211
ItbNAC44	itb06g19250.t6	3.44049e-25	0.998846
ItbNAC44	itb08g06470.t2	2.42739e-25	0.99889
ItbNAC44	itb10g01950.t1	2.4321e-25	0.998889
ItbNAC44	ItbNAC110	6.15992e-22	0.997345
ItbNAC44	itb10g15110.t2	2.494e-25	0.998886
ItbNAC44	itb13g14290.t1	2.96303e-22	0.997553
ItbNAC44	itb01g33620.t2	9.55989e-26	0.998999
ItbNAC44	itb01g07870.t1	2.4321e-25	0.998889
ItbNAC44	itb12g27130.t1	2.43232e-25	0.998889
ItbNAC44	itb15g11810.t1	1.68252e-25	0.998934
ItbNAC44	itb15g00030.t2	2.59725e-25	0.998881
ItbNAC44	itb13g21570.t3	2.43218e-25	0.998889
ItbNAC44	itb01g17020.t1	2.4321e-25	0.998889
ItbNAC44	itb07g22970.t1	2.4321e-25	0.998889
ItbNAC44	itb06g05830.t2	4.10906e-25	0.998823
ItbNAC44	itb02g03900.t3	1.442e-18	0.993704
ItbNAC44	itb04g01980.t6	4.5599e-25	0.998809
ItbNAC44	itb05g11090.t1	2.4321e-25	0.998889
ItbNAC44	itb01g07350.t1	2.4321e-25	0.998889
ItbNAC44	itb07g03970.t6	4.42225e-21	0.996694
ItbNAC44	itb13g26780.t1	9.76796e-18	0.992209
ItbNAC44	itb01g34520.t1	4.44633e-20	0.995726
ItbNAC44	itb04g16280.t1	2.4321e-25	0.998889
ItbNAC44	itb04g30060.t1	6.56666e-17	0.990364
ItbNAC44	itb01g29000.t2	1.40569e-18	0.993722
ItbNAC44	itb09g07050.t1	5.57092e-24	0.998427
ItbNAC44	itb13g20450.t15	2.54453e-25	0.998884
ItbNAC44	itb05g01620.t2	1.66049e-20	0.99617
ItbNAC44	itb11g20770.t1	6.04094e-18	0.992615
ItbNAC44	itb01g10670.t3	2.43074e-25	0.998889
ItbNAC44	itb08g13850.t1	1.33034e-22	0.997761
ItbNAC44	itb06g19900.t1	6.63297e-25	0.998758
ItbNAC44	itb04g10810.t1	7.52956e-18	0.992432
ItbNAC44	itb02g09560.t3	2.57473e-20	0.995979
ItbNAC44	itb02g06170.t2	3.07074e-26	0.999118
ItbNAC44	itb10g02690.t1	2.76884e-24	0.998545
ItbNAC44	itb11g11180.t5	1.88042e-18	0.993516
ItbNAC44	itb12g13850.t5	2.56955e-25	0.998883
ItbNAC97	itb04g31510.t1	1.04995e-18	0.993923
ItbNAC97	itb08g14790.t1	1.44092e-21	0.997082
ItbNAC97	itb13g05320.t1	4.80144e-24	0.998453
ItbNAC97	itb03g16890.t1	2.32738e-22	0.997618
ItbNAC97	itb03g19000.t1	2.1184e-19	0.994915
ItbNAC97	itb07g06950.t1	3.87246e-26	0.999095
ItbNAC97	itb03g02790.t1	9.10874e-17	0.990006
ItbNAC97	itb02g11090.t1	1.92483e-20	0.996107
ItbNAC97	itb04g25890.t1	2.54013e-22	0.997594
ItbNAC97	itb05g25190.t1	8.41636e-21	0.996449
ItbNAC97	itb07g06640.t1	9.21471e-22	0.997224
ItbNAC97	itb01g01980.t1	2.47407e-18	0.993314
ItbNAC97	itb07g08410.t1	1.108e-20	0.996339
ItbNAC97	itb10g15010.t1	9.78787e-18	0.992207
ItbNAC97	itb15g07220.t1	2.29016e-21	0.996928
ItbNAC97	itb03g13490.t1	6.95226e-25	0.998752
ItbNAC97	itb14g01190.t1	9.30279e-20	0.99536
ItbNAC97	itb11g05510.t1	1.37967e-26	0.999193
ItbNAC97	itb13g07040.t1	6.9426e-19	0.994197
ItbNAC97	itb10g24410.t1	3.88906e-21	0.996741
ItbNAC97	itb13g06270.t1	2.31244e-17	0.991423
ItbNAC97	itb06g03860.t1	2.22307e-20	0.996044
ItbNAC97	itb12g03690.t1	3.0488e-17	0.991155
ItbNAC20	itb09g06380.t1	1.73655e-17	0.991693
ItbNAC20	itb15g23420.t1	2.54642e-20	0.995983
ItbNAC20	itb14g04770.t1	2.40637e-18	0.993335
ItbNAC20	itb04g29270.t1	2.50033e-17	0.991348
ItbNAC20	itb00g00050.t1	1.25575e-19	0.995203
ItbNAC20	itb13g25490.t1	5.51721e-20	0.995623
ItbNAC20	itb02g00500.t1	8.42522e-19	0.99407
ItbNAC20	itb01g07810.t1	8.18885e-19	0.994089
ItbNAC20	itb13g06000.t1	4.69963e-20	0.9957
ItbNAC20	itb09g12160.t1	7.1613e-20	0.995494
ItbNAC20	itb13g17100.t1	1.03162e-17	0.992161
ItbNAC20	itb05g11390.t1	5.7317e-19	0.994319
ItbNAC20	itb06g03540.t1	1.50096e-18	0.993676
ItbNAC20	itb04g23460.t1	1.87514e-20	0.996118
ItbNAC20	itb11g06570.t1	1.86382e-17	0.991627
ItbNAC20	itb01g26770.t1	8.84845e-21	0.996429
ItbNAC20	itb13g23930.t1	7.80857e-19	0.99412
ItbNAC20	itb08g09940.t1	5.0776e-19	0.994395
ItbNAC20	itb15g07770.t1	1.74648e-19	0.995023
ItbNAC20	itb11g14900.t1	3.13801e-17	0.991126
ItbNAC20	itb10g01090.t1	2.58192e-20	0.995977
ItbNAC20	itb15g12690.t1	7.71399e-21	0.996483
ItbNAC20	itb03g13510.t1	1.3379e-17	0.991931
ItbNAC20	itb10g04480.t1	1.42951e-21	0.997085
ItbNAC20	itb14g07170.t1	1.51093e-18	0.993672
ItbNAC20	itb07g03640.t1	6.98506e-19	0.994193
ItbNAC20	itb12g04390.t1	4.80518e-18	0.992801
ItbNAC20	itb06g11000.t1	7.13744e-21	0.996514
ItbNAC20	itb09g17300.t1	6.28735e-18	0.992582
ItbNAC20	itb15g05950.t1	2.43253e-18	0.993327
ItbNAC20	itb14g19780.t1	2.51658e-21	0.996895
ItbNAC20	itb14g17850.t1	8.08759e-20	0.995432
ItbNAC20	itb04g11590.t1	1.48433e-19	0.995113
ItbNAC20	itb03g21670.t1	1.61343e-18	0.993625
ItbNAC20	itb06g24200.t1	6.95191e-17	0.990303
ItbNAC20	itb08g04300.t1	2.98642e-20	0.995912
ItbNAC20	itb01g22420.t1	6.33749e-20	0.995554
ItbNAC20	itb03g06030.t1	2.60747e-18	0.993275
ItbNAC20	itb07g06950.t1	4.08108e-17	0.990862
ItbNAC20	itb05g15180.t1	7.98428e-19	0.994106
ItbNAC20	itb05g11560.t1	9.53e-18	0.99223
ItbNAC20	itb12g08160.t1	4.75885e-18	0.992809
ItbNAC20	itb05g19980.t1	1.03098e-17	0.992162
ItbNAC20	itb04g31620.t1	2.92415e-20	0.995921
ItbNAC20	itb14g08610.t1	6.65975e-18	0.992534
ItbNAC20	itb11g05810.t1	8.74674e-19	0.994045
ItbNAC20	itb14g12310.t1	6.62295e-17	0.990355
ItbNAC20	itb09g22310.t1	5.06485e-19	0.994397
ItbNAC20	itb08g00840.t1	1.42382e-19	0.995135
ItbNAC20	itb11g22500.t1	2.6378e-17	0.991296
ItbNAC20	itb02g11090.t1	4.66617e-18	0.992825
ItbNAC20	itb02g21810.t1	2.73048e-22	0.997575
ItbNAC20	itb01g04810.t1	9.16616e-18	0.992264
ItbNAC20	itb04g21570.t1	2.37276e-17	0.991398
ItbNAC20	itb03g06860.t1	8.04005e-17	0.990144
ItbNAC20	itb06g13120.t1	9.90634e-21	0.996384
ItbNAC20	itb05g15590.t1	6.96773e-17	0.990301
ItbNAC20	itb11g06940.t1	4.23871e-17	0.990824
ItbNAC20	itb06g03310.t1	1.09319e-20	0.996344
ItbNAC20	itb07g15620.t1	6.06042e-19	0.994284
ItbNAC20	itb07g05190.t1	3.36282e-17	0.991057
ItbNAC20	itb02g09170.t1	1.10633e-21	0.997167
ItbNAC20	itb01g23430.t2	1.49836e-17	0.991828
ItbNAC20	itb15g00270.t1	9.52432e-20	0.995348
ItbNAC20	itb02g09130.t1	3.94352e-17	0.990897
ItbNAC20	itb02g17780.t1	1.84096e-19	0.994994
ItbNAC20	itb03g05860.t1	1.1155e-17	0.992093
ItbNAC20	itb03g19330.t1	5.15797e-19	0.994386
ItbNAC20	itb06g04900.t1	7.92403e-20	0.995443
ItbNAC20	itb01g03280.t2	7.86513e-17	0.990169
ItbNAC20	itb05g26610.t1	1.60616e-17	0.991765
ItbNAC20	itb07g01220.t2	5.60485e-18	0.992676
ItbNAC20	itb09g28900.t1	8.87789e-21	0.996428
ItbNAC20	itb09g18520.t1	1.53545e-20	0.996203
ItbNAC20	itb09g28580.t1	7.08402e-19	0.994184
ItbNAC20	itb02g13710.t1	1.17158e-20	0.996316
ItbNAC20	itb01g02000.t1	2.69156e-17	0.991277
ItbNAC20	itb01g27600.t1	8.81519e-21	0.996431
ItbNAC20	itb02g09160.t1	6.31691e-20	0.995556
ItbNAC20	itb05g18450.t1	1.31165e-20	0.996269
ItbNAC20	itb12g04090.t1	6.37231e-20	0.995552
ItbNAC20	itb13g12650.t2	5.771e-17	0.990502
ItbNAC20	itb09g06460.t4	8.90742e-18	0.992288
ItbNAC20	itb01g34180.t1	1.4449e-19	0.995127
ItbNAC20	itb01g00550.t1	9.49197e-18	0.992234
ItbNAC20	itb04g29550.t1	1.30109e-17	0.991956
ItbNAC20	itb01g31410.t1	2.31287e-18	0.993364
ItbNAC20	itb12g26270.t1	5.66772e-19	0.994326
ItbNAC20	itb09g01970.t1	8.05381e-18	0.992375
ItbNAC20	itb05g10390.t1	7.12301e-20	0.995496
ItbNAC20	itb15g07930.t1	3.25275e-18	0.993107
ItbNAC20	itb08g02530.t1	7.45928e-21	0.996496
ItbNAC20	itb12g03370.t1	1.02683e-19	0.995309
ItbNAC20	itb04g03920.t1	1.71581e-17	0.991704
ItbNAC20	itb05g22140.t1	8.65554e-17	0.990063
ItbNAC20	itb03g23540.t1	6.62774e-18	0.992538
ItbNAC20	itb04g26720.t1	2.63168e-20	0.995969
ItbNAC20	itb11g05970.t1	4.59868e-20	0.99571
ItbNAC20	ItbNAC59	7.12826e-20	0.995496
ItbNAC20	itb12g05420.t1	3.52354e-20	0.995836
ItbNAC20	itb12g00790.t1	8.72559e-18	0.992306
ItbNAC20	itb03g06020.t1	4.50426e-19	0.99447
ItbNAC20	itb07g13450.t1	2.3643e-17	0.991402
ItbNAC20	itb04g05690.t1	1.04821e-17	0.992147
ItbNAC20	itb02g00470.t1	6.78049e-19	0.994212
ItbNAC20	itb13g11740.t1	9.13724e-21	0.996416
ItbNAC20	itb06g16810.t1	3.78334e-18	0.99299
ItbNAC20	itb10g04670.t1	2.9336e-17	0.991193
ItbNAC20	itb14g01190.t1	4.40775e-17	0.990783
ItbNAC20	itb11g03710.t1	3.30677e-18	0.993095
ItbNAC20	itb03g17560.t1	1.49308e-19	0.995109
ItbNAC20	itb01g01700.t1	8.11953e-18	0.992368
ItbNAC20	itb05g15610.t1	3.87749e-22	0.997478
ItbNAC20	itb13g07040.t1	3.00137e-20	0.995909
ItbNAC20	itb01g35960.t1	5.62229e-18	0.992674
ItbNAC20	itb01g29810.t2	1.73556e-20	0.996151
ItbNAC20	itb14g12530.t1	7.3605e-21	0.996502
ItbNAC20	itb01g24360.t1	9.96229e-18	0.992192
ItbNAC20	itb04g27380.t1	5.94059e-20	0.995586
ItbNAC20	itb15g05420.t1	1.05417e-17	0.992142
ItbNAC20	itb06g11640.t1	2.48367e-17	0.991355
ItbNAC20	itb07g08120.t1	8.96495e-19	0.994029
ItbNAC20	itb01g06370.t1	6.91204e-19	0.9942
ItbNAC20	ItbNAC88	2.61273e-19	0.994795
ItbNAC20	itb11g06590.t1	1.33557e-20	0.996262
ItbNAC20	itb10g24410.t1	5.35182e-19	0.994362
ItbNAC20	itb05g22640.t1	1.52158e-18	0.993667
ItbNAC20	itb07g13440.t1	2.47466e-17	0.991358
ItbNAC20	itb14g04810.t1	6.47026e-17	0.99038
ItbNAC20	itb10g02580.t1	1.05041e-20	0.99636
ItbNAC20	itb09g14780.t1	9.64149e-18	0.99222
ItbNAC20	itb14g05160.t1	2.90541e-20	0.995924
ItbNAC20	itb04g17430.t1	5.99584e-18	0.992621
ItbNAC20	itb08g15250.t1	1.19766e-19	0.995228
ItbNAC20	itb03g04160.t1	8.74129e-20	0.995392
ItbNAC20	itb09g11160.t1	2.4871e-17	0.991353
ItbNAC20	itb04g07620.t1	2.76328e-18	0.993231
ItbNAC20	itb03g01770.t2	2.18782e-18	0.993405
ItbNAC20	itb15g23530.t1	7.89525e-21	0.996474
ItbNAC20	itb01g20880.t1	9.83648e-18	0.992203
ItbNAC20	itb03g16890.t4	5.25388e-18	0.992729
ItbNAC20	itb09g11150.t1	8.24341e-20	0.995422
ItbNAC20	itb10g17620.t1	2.93797e-18	0.993185
ItbNAC20	itb02g10570.t2	6.84143e-19	0.994206
ItbNAC20	itb10g04880.t1	1.81774e-17	0.99165
ItbNAC20	itb07g11490.t1	2.61075e-18	0.993274
ItbNAC20	itb10g23980.t1	5.5103e-18	0.99269
ItbNAC20	itb07g06990.t1	3.30192e-17	0.991076
ItbNAC20	itb14g08990.t1	4.6393e-17	0.990731
ItbNAC20	itb08g00560.t1	6.34397e-17	0.990401
ItbNAC20	itb12g05800.t1	2.22024e-20	0.996044
ItbNAC20	itb03g15520.t2	1.94032e-19	0.994965
ItbNAC20	itb06g03860.t1	2.02375e-19	0.994941
ItbNAC20	itb09g12130.t1	1.18023e-20	0.996313
ItbNAC20	itb04g11570.t1	4.56244e-20	0.995714
ItbNAC20	itb04g14310.t1	7.84914e-19	0.994117
ItbNAC20	itb01g29810.t1	3.82561e-19	0.994569
ItbNAC20	itb03g23090.t1	9.48373e-20	0.99535
ItbNAC20	itb13g00490.t1	1.3755e-20	0.99625
ItbNAC20	itb07g07160.t3	1.43293e-17	0.991869
ItbNAC50	itb03g10610.t1	8.0548e-19	0.9941
ItbNAC50	itb09g28220.t1	8.92166e-19	0.994032
ItbNAC50	itb03g02560.t1	4.90335e-18	0.992785
ItbNAC50	itb01g19230.t1	8.92166e-19	0.994032
ItbNAC50	itb09g01620.t2	6.71906e-20	0.995525
ItbNAC50	itb03g00890.t1	5.79002e-17	0.990499
ItbNAC50	itb03g08840.t2	7.03953e-18	0.992488
ItbNAC50	itb05g08290.t2	9.33484e-19	0.994002
ItbNAC50	itb09g17940.t1	4.01984e-18	0.992943
ItbNAC50	itb05g01560.t2	1.18506e-18	0.993841
ItbNAC50	itb04g05220.t2	9.53266e-19	0.993988
ItbNAC50	itb06g11250.t2	8.92166e-19	0.994032
ItbNAC50	itb15g11540.t1	8.92166e-19	0.994032
ItbNAC50	itb07g10810.t1	8.92166e-19	0.994032
ItbNAC50	itb03g16670.t1	3.59573e-19	0.994607
ItbNAC50	itb07g12110.t1	1.90217e-18	0.993507
ItbNAC50	itb06g05900.t1	5.79507e-18	0.992649
ItbNAC50	itb09g15270.t1	1.72841e-18	0.993576
ItbNAC50	itb13g08140.t1	8.92166e-19	0.994032
ItbNAC50	itb04g21980.t1	1.71882e-20	0.996155
ItbNAC50	itb09g12120.t1	2.32411e-17	0.991418
ItbNAC50	itb08g15720.t1	7.28706e-19	0.994165
ItbNAC50	itb07g21050.t3	8.9212e-19	0.994032
ItbNAC50	itb08g07530.t3	8.9178e-19	0.994033
ItbNAC50	itb05g19180.t1	6.01665e-20	0.99558
ItbNAC50	itb06g15210.t1	3.61883e-20	0.995823
ItbNAC50	itb02g14660.t2	1.31093e-17	0.991949
ItbNAC50	itb11g09710.t2	8.84101e-19	0.994038
ItbNAC50	itb09g30870.t1	1.42252e-17	0.991875
ItbNAC50	itb10g15910.t5	2.69489e-19	0.994777
ItbNAC50	itb13g20450.t11	8.99821e-19	0.994027
ItbNAC50	itb08g04670.t1	8.92166e-19	0.994032
ItbNAC50	itb04g09800.t1	8.92166e-19	0.994032
ItbNAC50	itb13g23580.t5	9.29064e-19	0.994005
ItbNAC50	itb06g19250.t7	2.35588e-18	0.993351
ItbNAC50	itb02g21060.t1	8.92166e-19	0.994032
ItbNAC50	itb02g05300.t2	1.88139e-19	0.994982
ItbNAC50	itb13g13980.t1	8.92166e-19	0.994032
ItbNAC50	itb09g07590.t1	1.22253e-18	0.993819
ItbNAC50	itb11g20390.t1	8.92166e-19	0.994032
ItbNAC50	itb14g07170.t4	9.97804e-19	0.993957
ItbNAC50	itb04g05440.t2	1.84395e-18	0.99353
ItbNAC50	itb04g03050.t1	3.47864e-17	0.991024
ItbNAC50	itb06g02020.t1	8.92166e-19	0.994032
ItbNAC50	itb06g19250.t1	5.23933e-19	0.994376
ItbNAC50	itb01g03170.t3	3.74933e-19	0.994582
ItbNAC50	itb04g30920.t1	8.92166e-19	0.994032
ItbNAC50	itb06g23290.t1	8.92166e-19	0.994032
ItbNAC50	itb05g06890.t1	8.92166e-19	0.994032
ItbNAC50	itb06g07170.t1	2.05052e-19	0.994934
ItbNAC50	itb01g20700.t1	1.06963e-17	0.99213
ItbNAC50	itb03g05650.t2	2.31728e-19	0.994864
ItbNAC50	itb08g02670.t2	9.40924e-20	0.995355
ItbNAC50	itb08g05560.t4	1.18605e-17	0.992038
ItbNAC50	itb15g09040.t2	9.9314e-19	0.993961
ItbNAC50	itb09g30950.t1	1.42087e-19	0.995136
ItbNAC50	itb14g03880.t1	4.49706e-17	0.990763
ItbNAC50	itb10g21870.t1	2.38441e-17	0.991394
ItbNAC50	itb12g21200.t1	3.07258e-17	0.991147
ItbNAC50	itb05g01490.t1	8.90445e-20	0.995383
ItbNAC50	itb04g30110.t1	5.07996e-19	0.994395
ItbNAC50	itb14g04390.t2	9.11823e-19	0.994018
ItbNAC50	itb08g06530.t1	5.24759e-19	0.994375
ItbNAC50	itb03g20240.t1	1.35714e-20	0.996255
ItbNAC50	itb13g10090.t2	8.92166e-19	0.994032
ItbNAC50	itb12g19590.t1	2.56791e-17	0.991322
ItbNAC50	itb05g16360.t3	8.42687e-19	0.99407
ItbNAC50	ItbNAC44	1.01598e-20	0.996374
ItbNAC50	itb03g25200.t1	3.85312e-18	0.992976
ItbNAC50	itb04g25350.t1	3.11227e-17	0.991134
ItbNAC50	itb05g16690.t5	6.51524e-18	0.992553
ItbNAC50	itb02g13620.t5	1.14662e-18	0.993863
ItbNAC50	itb04g15940.t1	5.90667e-20	0.995589
ItbNAC50	itb04g24890.t1	1.14298e-21	0.997156
ItbNAC50	itb07g20210.t1	8.92166e-19	0.994032
ItbNAC50	itb11g08110.t1	9.81205e-19	0.993969
ItbNAC50	itb06g12920.t1	8.92166e-19	0.994032
ItbNAC50	itb01g12780.t1	8.92166e-19	0.994032
ItbNAC50	itb08g05230.t1	2.89994e-18	0.993195
ItbNAC50	itb10g03610.t1	8.28981e-20	0.99542
ItbNAC50	itb13g21340.t1	8.92166e-19	0.994032
ItbNAC50	itb15g17850.t1	8.92166e-19	0.994032
ItbNAC50	itb12g17550.t1	8.92166e-19	0.994032
ItbNAC50	itb13g18160.t1	8.68734e-19	0.99405
ItbNAC50	itb14g15970.t1	8.81331e-18	0.992298
ItbNAC50	itb12g19680.t1	5.12762e-19	0.994389
ItbNAC50	itb14g19180.t1	8.92166e-19	0.994032
ItbNAC50	itb14g16430.t2	8.66512e-19	0.994052
ItbNAC50	itb08g16170.t1	8.67235e-19	0.994051
ItbNAC50	itb15g20500.t1	8.92166e-19	0.994032
ItbNAC50	itb11g11880.t5	1.13416e-19	0.995257
ItbNAC50	itb08g07590.t4	3.46301e-19	0.994629
ItbNAC50	itb10g11690.t1	8.92166e-19	0.994032
ItbNAC50	itb15g11810.t3	4.06075e-17	0.990867
ItbNAC50	itb01g31390.t1	8.92166e-19	0.994032
ItbNAC50	itb06g04290.t1	6.8902e-18	0.992506
ItbNAC50	itb04g05620.t1	8.92166e-19	0.994032
ItbNAC50	itb05g21390.t1	8.92166e-19	0.994032
ItbNAC50	itb15g13820.t1	8.92166e-19	0.994032
ItbNAC50	itb04g16540.t2	1.67367e-18	0.993599
ItbNAC50	itb11g07010.t1	4.86462e-22	0.997414
ItbNAC50	itb03g04220.t1	5.59928e-19	0.994334
ItbNAC50	itb04g22440.t2	4.00978e-18	0.992945
ItbNAC50	itb04g30070.t1	8.92166e-19	0.994032
ItbNAC50	itb03g25650.t1	6.226e-19	0.994267
ItbNAC50	itb08g07670.t2	5.17027e-19	0.994384
ItbNAC50	itb02g13400.t1	2.79235e-19	0.994756
ItbNAC50	itb13g15330.t2	2.31943e-18	0.993362
ItbNAC50	itb06g12880.t3	7.26658e-20	0.995486
ItbNAC50	itb09g08310.t4	8.90198e-19	0.994034
ItbNAC50	itb15g10710.t1	4.93889e-19	0.994413
ItbNAC50	itb12g09120.t2	7.64051e-19	0.994134
ItbNAC50	itb05g18590.t1	8.91629e-19	0.994033
ItbNAC50	itb01g24280.t1	9.99109e-19	0.993957
ItbNAC50	itb14g18270.t2	9.09116e-19	0.99402
ItbNAC50	itb06g13750.t1	6.08846e-17	0.990445
ItbNAC50	itb07g23330.t1	8.92166e-19	0.994032
ItbNAC50	itb06g06710.t2	8.91592e-19	0.994033
ItbNAC50	itb08g16490.t3	1.21098e-18	0.993826
ItbNAC50	itb04g07840.t5	6.35546e-18	0.992573
ItbNAC50	itb07g22690.t2	2.22913e-18	0.993391
ItbNAC50	itb03g18800.t5	2.05549e-18	0.993451
ItbNAC50	itb08g00910.t1	7.11035e-19	0.994181
ItbNAC50	itb05g18080.t1	8.92166e-19	0.994032
ItbNAC50	itb04g03720.t1	6.11108e-17	0.990441
ItbNAC50	itb12g16050.t1	8.92166e-19	0.994032
ItbNAC50	itb08g13120.t1	5.61978e-19	0.994332
ItbNAC50	itb14g21680.t1	2.10802e-18	0.993432
ItbNAC50	itb08g06470.t3	2.2384e-18	0.993388
ItbNAC50	itb01g29080.t1	3.34427e-18	0.993086
ItbNAC50	itb05g24510.t4	8.92161e-19	0.994032
ItbNAC50	itb04g04140.t4	6.582e-18	0.992544
ItbNAC50	itb01g24600.t1	9.06085e-17	0.990012
ItbNAC50	itb03g23720.t1	9.17274e-19	0.994014
ItbNAC50	itb06g07210.t1	2.08812e-17	0.99152
ItbNAC50	itb10g23030.t1	6.6228e-20	0.995533
ItbNAC50	itb15g04220.t2	8.97969e-19	0.994028
ItbNAC50	itb08g08770.t1	8.92166e-19	0.994032
ItbNAC50	itb02g10910.t1	9.97741e-19	0.993958
ItbNAC50	itb04g09450.t2	1.14448e-18	0.993864
ItbNAC50	itb14g21740.t1	9.22785e-19	0.99401
ItbNAC50	itb12g19230.t1	2.88472e-17	0.991209
ItbNAC50	itb09g26250.t5	8.6689e-19	0.994051
ItbNAC50	itb10g23920.t6	8.78848e-19	0.994042
ItbNAC50	itb02g14460.t3	4.26912e-18	0.992895
ItbNAC50	itb12g09130.t1	5.61692e-18	0.992675
ItbNAC50	itb10g25260.t1	3.43079e-17	0.991037
ItbNAC50	itb05g09020.t1	8.92166e-19	0.994032
ItbNAC50	itb10g05580.t1	8.86574e-17	0.990036
ItbNAC50	itb02g00080.t1	2.93651e-19	0.994727
ItbNAC50	itb05g28240.t1	6.68529e-19	0.994221
ItbNAC50	itb07g02810.t1	8.67403e-20	0.995396
ItbNAC50	itb04g09450.t5	8.92492e-19	0.994032
ItbNAC50	itb11g07260.t1	3.22296e-18	0.993114
ItbNAC50	itb06g00770.t1	8.92166e-19	0.994032
ItbNAC50	itb13g03720.t3	7.85385e-19	0.994116
ItbNAC50	itb10g00660.t5	9.21407e-20	0.995365
ItbNAC50	itb08g04370.t1	4.84648e-19	0.994424
ItbNAC50	itb09g17960.t1	1.13964e-18	0.993867
ItbNAC50	itb02g26160.t9	9.82125e-19	0.993968
ItbNAC50	itb11g02300.t1	9.70507e-19	0.993976
ItbNAC50	itb05g28460.t1	8.92166e-19	0.994032
ItbNAC50	itb04g16430.t2	8.95049e-19	0.99403
ItbNAC50	itb01g29720.t2	8.97767e-19	0.994028
ItbNAC50	itb12g19680.t3	6.00419e-19	0.99429
ItbNAC50	itb04g29220.t1	8.92166e-19	0.994032
ItbNAC50	itb02g11270.t5	1.26897e-18	0.993793
ItbNAC50	itb11g14610.t1	2.79433e-18	0.993223
ItbNAC50	itb15g18150.t1	8.92166e-19	0.994032
ItbNAC50	itb01g13080.t1	1.73926e-18	0.993572
ItbNAC50	itb05g16360.t1	9.10224e-19	0.994019
ItbNAC50	itb06g12880.t1	8.81058e-19	0.994041
ItbNAC50	itb08g15210.t1	8.08267e-19	0.994098
ItbNAC50	itb08g07590.t2	7.84219e-20	0.995448
ItbNAC50	itb14g07300.t7	1.45383e-19	0.995124
ItbNAC50	itb12g28390.t1	8.92166e-19	0.994032
ItbNAC50	itb13g04020.t1	9.00309e-20	0.995377
ItbNAC50	itb04g09450.t3	8.92166e-19	0.994032
ItbNAC50	itb09g03740.t1	2.13138e-20	0.996062
ItbNAC50	itb15g21970.t1	3.51601e-17	0.991013
ItbNAC50	itb12g17690.t2	1.95044e-18	0.993489
ItbNAC50	itb11g03490.t4	2.36187e-19	0.994853
ItbNAC50	itb15g16480.t1	8.92166e-19	0.994032
ItbNAC50	itb15g20500.t2	8.92166e-19	0.994032
ItbNAC50	itb13g19570.t3	9.66018e-19	0.993979
ItbNAC50	itb02g11840.t1	1.74418e-20	0.996149
ItbNAC50	itb09g12420.t5	2.21493e-17	0.991464
ItbNAC50	itb01g31080.t1	8.92166e-19	0.994032
ItbNAC50	itb09g07180.t2	8.92438e-19	0.994032
ItbNAC50	itb10g26170.t1	8.92166e-19	0.994032
ItbNAC50	itb10g07720.t1	8.92166e-19	0.994032
ItbNAC50	itb08g14580.t1	8.92166e-19	0.994032
ItbNAC50	itb08g00670.t1	3.82483e-17	0.990928
ItbNAC50	itb04g23810.t1	8.92166e-19	0.994032
ItbNAC50	itb05g23420.t1	8.89753e-19	0.994034
ItbNAC50	itb14g19320.t1	7.97162e-19	0.994107
ItbNAC50	itb09g04890.t1	8.92166e-19	0.994032
ItbNAC50	itb10g15910.t4	1.95281e-21	0.996982
ItbNAC50	itb15g08560.t1	1.95824e-18	0.993486
ItbNAC50	itb09g26250.t2	4.89079e-19	0.994419
ItbNAC50	itb12g13150.t2	6.82824e-17	0.990322
ItbNAC50	itb15g00310.t1	3.07882e-18	0.993149
ItbNAC50	itb14g16590.t1	2.73584e-18	0.993239
ItbNAC50	itb01g11590.t1	1.34146e-20	0.99626
ItbNAC50	itb09g26130.t1	8.92166e-19	0.994032
ItbNAC50	itb03g21250.t1	6.50401e-18	0.992554
ItbNAC50	itb13g21390.t1	1.1686e-17	0.992051
ItbNAC50	itb01g17750.t1	7.06451e-19	0.994185
ItbNAC50	itb02g16750.t1	1.55218e-18	0.993653
ItbNAC50	itb03g08460.t2	1.93459e-17	0.991592
ItbNAC50	itb02g10740.t1	2.09678e-19	0.994921
ItbNAC50	itb13g03720.t1	1.24133e-18	0.993809
ItbNAC50	itb14g21350.t1	8.92963e-19	0.994032
ItbNAC50	itb01g35970.t1	3.33421e-20	0.995861
ItbNAC50	itb12g00330.t3	9.01927e-19	0.994025
ItbNAC50	itb13g06140.t1	4.18113e-18	0.992912
ItbNAC50	itb13g14850.t5	8.92166e-19	0.994032
ItbNAC50	itb02g09560.t1	5.30209e-18	0.992722
ItbNAC50	ItbNAC75	8.92166e-19	0.994032
ItbNAC50	itb03g14690.t1	4.14177e-19	0.994521
ItbNAC50	itb12g26910.t2	1.17636e-19	0.995238
ItbNAC50	itb12g23270.t2	2.93337e-19	0.994728
ItbNAC50	itb05g27220.t1	7.14763e-20	0.995495
ItbNAC50	itb04g10610.t1	6.78746e-17	0.990329
ItbNAC50	itb10g04220.t1	1.24962e-17	0.991992
ItbNAC50	itb11g03490.t3	1.36152e-18	0.993745
ItbNAC50	itb09g14620.t3	8.19683e-18	0.99236
ItbNAC50	itb12g13140.t1	3.35725e-19	0.994648
ItbNAC50	itb01g16770.t3	1.25159e-18	0.993803
ItbNAC50	itb13g20450.t18	5.61694e-19	0.994332
ItbNAC50	itb12g27890.t2	8.84899e-19	0.994038
ItbNAC50	itb05g01560.t1	1.07831e-18	0.993905
ItbNAC50	itb13g13530.t1	1.47871e-18	0.993687
ItbNAC50	itb05g16290.t1	1.14996e-18	0.993861
ItbNAC50	itb06g15440.t3	8.90731e-19	0.994033
ItbNAC50	itb05g17170.t5	7.94238e-19	0.994109
ItbNAC50	itb10g02270.t1	8.92166e-19	0.994032
ItbNAC50	itb04g24640.t2	8.96421e-19	0.994029
ItbNAC50	itb08g11240.t1	8.92166e-19	0.994032
ItbNAC50	itb09g03870.t6	9.07784e-19	0.994021
ItbNAC50	itb03g25860.t1	8.92166e-19	0.994032
ItbNAC50	itb03g06630.t1	8.92166e-19	0.994032
ItbNAC50	itb03g09530.t1	8.92166e-19	0.994032
ItbNAC50	itb01g28760.t1	2.34872e-17	0.991408
ItbNAC50	itb10g00660.t3	5.377e-17	0.990577
ItbNAC50	itb10g18110.t1	8.92166e-19	0.994032
ItbNAC50	itb02g05190.t1	1.56753e-17	0.991787
ItbNAC50	itb11g11210.t1	1.55329e-17	0.991795
ItbNAC50	itb07g23160.t1	8.92166e-19	0.994032
ItbNAC50	itb09g09960.t1	1.03905e-19	0.995303
ItbNAC50	itb05g26420.t2	8.94781e-19	0.99403
ItbNAC50	itb03g07880.t1	9.68012e-18	0.992217
ItbNAC50	itb13g08120.t1	8.92166e-19	0.994032
ItbNAC50	itb04g29040.t8	8.92479e-19	0.994032
ItbNAC50	itb14g03610.t1	2.94008e-18	0.993184
ItbNAC50	itb10g18480.t1	1.05413e-20	0.996359
ItbNAC50	itb01g33160.t1	2.76784e-19	0.994762
ItbNAC50	itb09g17940.t2	3.05917e-18	0.993154
ItbNAC50	itb08g05580.t1	5.59188e-21	0.996607
ItbNAC50	itb11g05480.t1	2.02189e-19	0.994942
ItbNAC50	itb07g04990.t1	1.14567e-18	0.993864
ItbNAC50	itb09g01720.t2	8.97032e-19	0.994029
ItbNAC50	itb10g02630.t1	3.65566e-18	0.993017
ItbNAC50	itb07g22080.t2	8.66014e-19	0.994052
ItbNAC50	itb13g03720.t4	8.92544e-19	0.994032
ItbNAC50	itb10g19900.t1	7.45088e-20	0.995474
ItbNAC50	itb06g06710.t3	8.94807e-19	0.99403
ItbNAC50	itb05g24860.t1	4.50476e-18	0.992853
ItbNAC50	itb10g15910.t1	1.70668e-20	0.996158
ItbNAC50	itb12g13850.t3	1.1559e-18	0.993858
ItbNAC50	itb13g02510.t1	1.61601e-20	0.996182
ItbNAC50	itb10g12690.t1	8.83513e-20	0.995387
ItbNAC50	itb01g07300.t1	2.76791e-18	0.99323
ItbNAC50	itb09g10130.t1	8.92166e-19	0.994032
ItbNAC50	itb04g08710.t3	8.92197e-19	0.994032
ItbNAC50	itb10g02640.t1	5.88581e-19	0.994302
ItbNAC50	itb09g12390.t1	8.92166e-19	0.994032
ItbNAC50	itb04g30620.t1	1.08857e-18	0.993899
ItbNAC50	itb04g29380.t1	4.4943e-19	0.994471
ItbNAC50	itb05g00420.t1	3.76413e-18	0.992994
ItbNAC50	itb07g07200.t2	5.76528e-17	0.990503
ItbNAC50	itb03g10850.t5	2.17596e-18	0.993409
ItbNAC50	itb07g17430.t1	8.92166e-19	0.994032
ItbNAC50	itb13g00790.t1	9.11296e-18	0.992269
ItbNAC50	itb01g35410.t1	7.78254e-19	0.994122
ItbNAC50	itb14g03440.t2	4.32289e-19	0.994495
ItbNAC50	itb03g10610.t2	2.02549e-18	0.993462
ItbNAC50	itb14g15640.t2	1.12842e-18	0.993874
ItbNAC50	itb08g05180.t1	3.5832e-18	0.993033
ItbNAC50	itb05g18730.t4	1.40583e-18	0.993722
ItbNAC50	itb08g08910.t2	8.91665e-19	0.994033
ItbNAC50	itb11g12240.t1	8.92386e-20	0.995382
ItbNAC50	itb13g20450.t17	9.07882e-19	0.994021
ItbNAC50	itb12g27890.t5	8.98554e-19	0.994028
ItbNAC50	itb10g02550.t1	7.78108e-17	0.99018
ItbNAC50	itb10g23480.t3	1.30377e-19	0.995183
ItbNAC50	itb12g16170.t1	8.92166e-19	0.994032
ItbNAC50	itb13g20450.t7	7.88463e-19	0.994114
ItbNAC50	itb12g19180.t1	8.92166e-19	0.994032
ItbNAC50	itb02g03900.t1	1.24487e-18	0.993807
ItbNAC50	itb03g01170.t3	1.3175e-18	0.993767
ItbNAC50	itb09g29110.t1	8.48658e-21	0.996446
ItbNAC50	itb05g01370.t2	1.2282e-21	0.997133
ItbNAC50	itb02g00070.t1	8.92166e-19	0.994032
ItbNAC50	itb03g01600.t1	1.29663e-18	0.993779
ItbNAC50	itb08g02400.t2	2.39644e-18	0.993338
ItbNAC50	itb15g12060.t2	1.34958e-21	0.997103
ItbNAC50	itb03g09220.t3	3.79802e-18	0.992987
ItbNAC50	itb12g27890.t1	3.61726e-18	0.993025
ItbNAC50	itb12g27130.t6	8.92166e-19	0.994032
ItbNAC50	itb01g10670.t1	6.05287e-19	0.994285
ItbNAC50	itb01g03740.t1	1.92065e-19	0.99497
ItbNAC50	itb09g07680.t1	9.55624e-19	0.993986
ItbNAC50	itb04g28960.t1	5.20669e-19	0.99438
ItbNAC50	itb11g03490.t6	1.78592e-18	0.993553
ItbNAC50	itb01g10670.t2	8.92165e-19	0.994032
ItbNAC50	itb14g11440.t2	1.20378e-18	0.99383
ItbNAC50	itb04g07340.t1	3.24759e-20	0.995873
ItbNAC50	itb02g06800.t1	1.96127e-19	0.994959
ItbNAC50	itb07g09100.t1	8.92166e-19	0.994032
ItbNAC50	itb12g13220.t2	3.70433e-19	0.994589
ItbNAC50	itb09g18090.t1	9.25321e-19	0.994008
ItbNAC50	itb02g10480.t2	1.35981e-18	0.993746
ItbNAC50	itb06g16750.t1	4.92865e-18	0.992781
ItbNAC50	itb07g24310.t7	3.17101e-17	0.991116
ItbNAC50	itb11g19670.t1	8.92166e-19	0.994032
ItbNAC50	itb06g00590.t2	2.97052e-18	0.993177
ItbNAC50	itb02g12380.t2	9.08806e-19	0.99402
ItbNAC50	itb01g10580.t2	1.24403e-19	0.995208
ItbNAC50	itb11g11670.t2	8.92664e-19	0.994032
ItbNAC50	itb09g02680.t1	4.07637e-22	0.997464
ItbNAC50	itb10g02540.t1	6.38614e-19	0.99425
ItbNAC50	itb06g03830.t1	1.44116e-19	0.995129
ItbNAC50	itb10g11320.t2	8.19232e-19	0.994089
ItbNAC50	itb02g12620.t2	9.15845e-19	0.994015
ItbNAC50	itb05g12970.t1	8.92166e-19	0.994032
ItbNAC50	itb07g08620.t1	9.36552e-18	0.992245
ItbNAC50	itb09g13200.t1	4.04728e-20	0.995771
ItbNAC50	itb04g29870.t1	2.84416e-19	0.994746
ItbNAC50	itb12g01080.t1	8.49831e-19	0.994065
ItbNAC50	itb01g27350.t1	9.61246e-19	0.993983
ItbNAC50	itb03g06630.t2	8.92166e-19	0.994032
ItbNAC50	itb09g07250.t1	4.0338e-18	0.99294
ItbNAC50	itb12g27130.t2	8.92372e-19	0.994032
ItbNAC50	itb15g00740.t1	1.88433e-17	0.991617
ItbNAC50	itb13g22050.t1	1.1981e-19	0.995228
ItbNAC50	itb07g18280.t1	8.92166e-19	0.994032
ItbNAC50	itb15g11810.t2	3.59055e-17	0.990992
ItbNAC50	itb15g11990.t1	7.64374e-17	0.9902
ItbNAC50	itb14g01350.t3	8.91904e-19	0.994033
ItbNAC50	itb07g23150.t1	8.92166e-19	0.994032
ItbNAC50	itb12g23900.t3	8.92176e-19	0.994032
ItbNAC50	itb05g27940.t1	6.96452e-21	0.996523
ItbNAC50	itb08g08060.t2	1.30164e-18	0.993776
ItbNAC50	itb01g11590.t2	8.97474e-22	0.997232
ItbNAC50	itb03g25650.t2	1.97003e-18	0.993482
ItbNAC50	itb15g12000.t1	3.91896e-17	0.990903
ItbNAC50	itb01g19240.t1	8.92166e-19	0.994032
ItbNAC50	itb11g03490.t7	9.9391e-19	0.99396
ItbNAC50	itb06g22040.t4	9.02806e-19	0.994024
ItbNAC50	itb15g22920.t1	8.92166e-19	0.994032
ItbNAC50	itb06g05550.t11	8.92166e-19	0.994032
ItbNAC50	itb15g16570.t1	8.92166e-19	0.994032
ItbNAC50	itb03g23360.t1	8.92166e-19	0.994032
ItbNAC50	itb03g18300.t2	8.92198e-19	0.994032
ItbNAC50	itb08g02400.t4	8.10405e-19	0.994096
ItbNAC50	itb09g01620.t1	1.32232e-19	0.995175
ItbNAC50	itb09g30890.t1	4.36072e-19	0.99449
ItbNAC50	itb01g06320.t1	2.81868e-19	0.994751
ItbNAC50	itb12g13180.t1	8.92166e-19	0.994032
ItbNAC50	itb04g28980.t1	8.92166e-19	0.994032
ItbNAC50	itb01g30550.t1	8.80005e-19	0.994041
ItbNAC50	itb02g10910.t2	4.83937e-19	0.994425
ItbNAC50	itb12g25560.t1	8.92166e-19	0.994032
ItbNAC50	itb15g22080.t2	8.58118e-19	0.994058
ItbNAC50	itb01g03180.t1	8.92166e-19	0.994032
ItbNAC50	itb04g08030.t2	6.46783e-19	0.994242
ItbNAC50	itb01g18010.t1	8.92166e-19	0.994032
ItbNAC50	itb04g11470.t1	8.92166e-19	0.994032
ItbNAC50	itb12g05560.t1	8.92166e-19	0.994032
ItbNAC50	itb14g18450.t1	8.92166e-19	0.994032
ItbNAC50	itb06g19250.t6	2.56699e-19	0.994805
ItbNAC50	itb08g06470.t2	8.92176e-19	0.994032
ItbNAC50	itb10g01950.t1	8.92166e-19	0.994032
ItbNAC50	ItbNAC110	5.51865e-18	0.992689
ItbNAC50	itb10g15110.t2	9.0157e-19	0.994025
ItbNAC50	itb13g14290.t1	2.78717e-24	0.998543
ItbNAC50	itb01g33620.t2	8.57561e-19	0.994059
ItbNAC50	itb01g07870.t1	8.92166e-19	0.994032
ItbNAC50	itb12g27130.t1	8.92289e-19	0.994032
ItbNAC50	itb15g11810.t1	7.38533e-19	0.994157
ItbNAC50	itb15g00030.t2	7.00616e-19	0.994191
ItbNAC50	itb13g21570.t3	8.92178e-19	0.994032
ItbNAC50	itb01g17020.t1	8.92166e-19	0.994032
ItbNAC50	itb07g22970.t1	8.92166e-19	0.994032
ItbNAC50	itb06g05830.t2	1.13589e-18	0.99387
ItbNAC50	itb04g01980.t6	8.6528e-19	0.994053
ItbNAC50	itb05g11090.t1	8.92166e-19	0.994032
ItbNAC50	itb01g07350.t1	8.92166e-19	0.994032
ItbNAC50	itb07g03970.t6	8.92369e-18	0.992287
ItbNAC50	itb13g26780.t1	1.98647e-17	0.991567
ItbNAC50	itb01g34520.t1	1.45601e-19	0.995123
ItbNAC50	itb13g25220.t1	6.03171e-17	0.990455
ItbNAC50	itb04g16280.t1	8.92166e-19	0.994032
ItbNAC50	itb04g30060.t1	8.22164e-18	0.992357
ItbNAC50	itb13g24980.t3	4.14967e-17	0.990845
ItbNAC50	itb09g07050.t1	1.64431e-18	0.993612
ItbNAC50	itb09g07030.t1	1.88247e-17	0.991618
ItbNAC50	itb13g20450.t15	9.11004e-19	0.994018
ItbNAC50	itb05g01620.t2	9.67449e-20	0.99534
ItbNAC50	itb07g04050.t1	1.77893e-19	0.995013
ItbNAC50	itb11g20770.t1	8.36051e-19	0.994075
ItbNAC50	itb01g10670.t3	8.9218e-19	0.994032
ItbNAC50	itb08g13850.t1	1.73252e-21	0.997022
ItbNAC50	itb06g19900.t1	8.099e-19	0.994096
ItbNAC50	itb02g09560.t3	4.26274e-17	0.990818
ItbNAC50	itb02g06170.t2	5.17844e-19	0.994383
ItbNAC50	itb10g02690.t1	1.66932e-19	0.995048
ItbNAC50	itb12g13850.t5	8.86381e-19	0.994037
ItbNAC29	itb01g20030.t2	2.38524e-18	0.993341
ItbNAC29	itb13g18530.t1	8.47217e-20	0.995408
ItbNAC29	itb05g22680.t1	2.04528e-19	0.994935
ItbNAC29	itb09g07420.t1	8.99017e-17	0.990021
ItbNAC29	itb13g26750.t1	1.06359e-18	0.993914
ItbNAC29	itb03g18180.t1	1.17488e-17	0.992047
ItbNAC29	itb15g03550.t1	2.41253e-17	0.991383
ItbNAC37	itb06g16130.t1	4.81072e-19	0.994429
ItbNAC37	itb05g21140.t1	6.99645e-18	0.992493
ItbNAC3	itb06g07210.t1	5.25484e-17	0.990601
ItbNAC3	itb10g25260.t1	4.87753e-18	0.992789
ItbNAC3	itb09g02680.t1	8.12818e-17	0.990132
ItbNAC3	itb09g07250.t1	2.6285e-17	0.9913
ItbNAC88	itb04g31510.t1	8.41468e-17	0.990094
ItbNAC88	itb10g19330.t1	7.42914e-17	0.990231
ItbNAC88	itb03g19000.t1	6.62216e-17	0.990355
ItbNAC88	itb08g15910.t1	7.41099e-17	0.990234
ItbNAC88	itb15g05950.t1	7.11303e-17	0.990278
ItbNAC88	ItbNAC20	2.61273e-19	0.994795
ItbNAC88	itb03g21670.t1	1.43657e-17	0.991866
ItbNAC88	itb06g24200.t1	4.70282e-17	0.990717
ItbNAC88	itb07g06950.t1	2.9125e-18	0.993192
ItbNAC88	itb12g08160.t1	2.59431e-17	0.991312
ItbNAC88	itb11g05810.t1	8.12539e-18	0.992367
ItbNAC88	itb02g11090.t1	1.95335e-18	0.993488
ItbNAC88	itb02g21810.t1	1.92167e-19	0.99497
ItbNAC88	itb02g09170.t1	1.98893e-18	0.993475
ItbNAC88	itb06g04900.t1	1.35133e-18	0.99375
ItbNAC88	itb04g25890.t1	5.61064e-18	0.992676
ItbNAC88	itb05g18450.t1	6.48468e-18	0.992556
ItbNAC88	itb09g06700.t1	4.79496e-17	0.990697
ItbNAC88	itb01g01980.t1	2.09423e-19	0.994922
ItbNAC88	itb15g07220.t1	1.27195e-17	0.991976
ItbNAC88	itb12g05420.t1	8.85478e-19	0.994037
ItbNAC88	itb12g00790.t1	5.48866e-17	0.990555
ItbNAC88	itb13g07040.t1	3.48025e-20	0.995841
ItbNAC88	itb11g06590.t1	7.60118e-19	0.994138
ItbNAC88	itb10g24410.t1	1.26956e-19	0.995197
ItbNAC88	itb07g11490.t1	1.41372e-17	0.991881
ItbNAC88	itb13g06270.t1	4.12409e-21	0.99672
ItbNAC88	itb06g03860.t1	1.63454e-19	0.99506
ItbNAC88	itb09g12130.t1	4.21051e-19	0.994511
ItbNAC88	itb04g14310.t1	1.88685e-17	0.991615
ItbNAC88	itb01g29810.t1	2.79012e-18	0.993224
ItbNAC110	itb07g07770.t1	2.43969e-19	0.994835
ItbNAC110	itb09g28220.t1	9.45346e-21	0.996403
ItbNAC110	itb08g06470.t5	1.44931e-17	0.991858
ItbNAC110	itb01g19230.t1	9.45346e-21	0.996403
ItbNAC110	itb09g01620.t2	1.87591e-19	0.994984
ItbNAC110	itb03g00890.t1	1.46181e-17	0.991851
ItbNAC110	itb03g08840.t2	1.56762e-19	0.995083
ItbNAC110	itb05g08290.t2	9.66235e-21	0.996394
ItbNAC110	itb09g17940.t1	1.46198e-25	0.99895
ItbNAC110	itb05g01560.t2	1.11215e-20	0.996337
ItbNAC110	itb04g05220.t2	8.85909e-21	0.996429
ItbNAC110	itb06g11250.t2	9.45346e-21	0.996403
ItbNAC110	itb15g11540.t1	9.45346e-21	0.996403
ItbNAC110	itb07g10810.t1	9.45346e-21	0.996403
ItbNAC110	itb03g16670.t1	1.23132e-20	0.996295
ItbNAC110	itb06g05900.t1	8.52055e-19	0.994063
ItbNAC110	itb09g15270.t1	1.12956e-20	0.996331
ItbNAC110	itb13g08140.t1	9.45346e-21	0.996403
ItbNAC110	itb04g21980.t1	9.6979e-20	0.995339
ItbNAC110	itb09g12120.t1	8.1296e-17	0.990132
ItbNAC110	itb08g15720.t1	1.01631e-20	0.996374
ItbNAC110	itb07g21050.t3	9.45349e-21	0.996403
ItbNAC110	itb08g07530.t3	9.45756e-21	0.996403
ItbNAC110	itb05g19180.t1	3.72236e-22	0.99749
ItbNAC110	itb06g15210.t1	3.2567e-19	0.994666
ItbNAC110	itb02g14660.t2	1.10283e-20	0.996341
ItbNAC110	itb03g10300.t2	6.09371e-18	0.992608
ItbNAC110	itb11g09710.t2	9.42916e-21	0.996404
ItbNAC110	itb09g30870.t1	1.10115e-20	0.996341
ItbNAC110	itb10g15910.t5	3.69402e-21	0.99676
ItbNAC110	itb13g20450.t11	9.61389e-21	0.996396
ItbNAC110	itb08g04670.t1	9.45346e-21	0.996403
ItbNAC110	itb04g09800.t1	9.45346e-21	0.996403
ItbNAC110	itb13g23580.t5	9.84735e-21	0.996386
ItbNAC110	itb06g19250.t7	8.3132e-21	0.996454
ItbNAC110	itb02g21060.t1	9.45346e-21	0.996403
ItbNAC110	itb02g05300.t2	2.4646e-18	0.993317
ItbNAC110	itb12g27580.t1	3.45809e-19	0.99463
ItbNAC110	itb13g13980.t1	9.45346e-21	0.996403
ItbNAC110	itb09g07590.t1	1.12878e-19	0.995259
ItbNAC110	itb11g20390.t1	9.45346e-21	0.996403
ItbNAC110	itb14g07170.t4	1.05445e-20	0.996359
ItbNAC110	itb04g05440.t2	1.73185e-21	0.997022
ItbNAC110	itb04g03050.t1	7.16187e-22	0.9973
ItbNAC110	itb06g02020.t1	9.45346e-21	0.996403
ItbNAC110	itb06g19250.t1	6.65416e-21	0.996541
ItbNAC110	itb01g03170.t3	3.46488e-17	0.991028
ItbNAC110	itb04g30920.t1	9.45346e-21	0.996403
ItbNAC110	itb06g23290.t1	9.45346e-21	0.996403
ItbNAC110	itb05g06890.t1	9.45346e-21	0.996403
ItbNAC110	itb09g06480.t1	3.47258e-19	0.994628
ItbNAC110	itb06g07170.t1	9.38191e-18	0.992244
ItbNAC110	itb01g20700.t1	2.52987e-19	0.994814
ItbNAC110	itb03g05650.t2	1.18911e-17	0.992036
ItbNAC110	itb08g02670.t2	1.88838e-19	0.99498
ItbNAC110	itb15g09040.t2	1.77854e-22	0.997688
ItbNAC110	itb09g30950.t1	7.53165e-21	0.996493
ItbNAC110	itb14g03880.t1	8.78211e-17	0.990047
ItbNAC110	itb12g21200.t1	9.04403e-17	0.990014
ItbNAC110	itb05g01490.t1	4.01959e-19	0.994539
ItbNAC110	itb04g30110.t1	1.47865e-19	0.995115
ItbNAC110	itb14g04390.t2	9.36667e-21	0.996406
ItbNAC110	itb08g06530.t1	3.13352e-19	0.994689
ItbNAC110	itb03g20240.t1	1.1089e-20	0.996338
ItbNAC110	itb15g02770.t3	3.95683e-17	0.990894
ItbNAC110	itb13g10090.t2	9.45346e-21	0.996403
ItbNAC110	itb05g16360.t3	4.34219e-19	0.994492
ItbNAC110	ItbNAC44	6.15992e-22	0.997345
ItbNAC110	itb03g25200.t1	1.12545e-24	0.998683
ItbNAC110	itb04g25350.t1	4.40499e-18	0.99287
ItbNAC110	itb05g16690.t5	1.10588e-19	0.99527
ItbNAC110	itb02g13620.t5	1.28005e-20	0.996279
ItbNAC110	itb04g24960.t1	6.71682e-17	0.99034
ItbNAC110	itb04g15940.t1	4.60981e-24	0.99846
ItbNAC110	itb04g24890.t1	1.16599e-21	0.99715
ItbNAC110	itb07g20210.t1	9.45346e-21	0.996403
ItbNAC110	itb11g08110.t1	1.31071e-26	0.999197
ItbNAC110	itb06g12920.t1	9.45346e-21	0.996403
ItbNAC110	itb01g12780.t1	9.45346e-21	0.996403
ItbNAC110	itb08g05230.t1	1.99895e-18	0.993471
ItbNAC110	itb10g03610.t1	1.46189e-21	0.997077
ItbNAC110	itb13g21340.t1	9.45346e-21	0.996403
ItbNAC110	itb15g17850.t1	9.45346e-21	0.996403
ItbNAC110	itb12g17550.t1	9.45346e-21	0.996403
ItbNAC110	itb13g18160.t1	9.19848e-26	0.999003
ItbNAC110	itb12g19680.t1	5.74941e-25	0.998778
ItbNAC110	itb14g19180.t1	9.45346e-21	0.996403
ItbNAC110	itb14g16430.t2	9.5417e-21	0.996399
ItbNAC110	itb08g16170.t1	9.56585e-21	0.996398
ItbNAC110	itb15g20500.t1	9.45346e-21	0.996403
ItbNAC110	itb11g11880.t5	2.04364e-18	0.993455
ItbNAC110	itb08g07590.t4	3.23962e-20	0.995874
ItbNAC110	itb10g11690.t1	9.45346e-21	0.996403
ItbNAC110	itb13g26460.t1	3.37506e-18	0.993079
ItbNAC110	itb15g11810.t3	9.12005e-18	0.992268
ItbNAC110	itb01g31390.t1	9.45346e-21	0.996403
ItbNAC110	itb06g04290.t1	6.07542e-20	0.995575
ItbNAC110	itb08g08160.t1	1.25535e-17	0.991988
ItbNAC110	itb04g05620.t1	9.45346e-21	0.996403
ItbNAC110	itb05g21390.t1	9.45346e-21	0.996403
ItbNAC110	itb15g13820.t1	9.45346e-21	0.996403
ItbNAC110	itb04g16540.t2	1.50169e-17	0.991826
ItbNAC110	itb11g07010.t1	3.83129e-19	0.994568
ItbNAC110	itb05g16360.t7	1.2938e-17	0.991961
ItbNAC110	itb04g22440.t2	1.82637e-18	0.993537
ItbNAC110	itb04g30070.t1	9.45346e-21	0.996403
ItbNAC110	itb03g25650.t1	3.78646e-21	0.996751
ItbNAC110	itb07g03970.t4	1.55686e-17	0.991793
ItbNAC110	itb08g07670.t2	9.31137e-18	0.99225
ItbNAC110	itb13g15330.t2	2.2447e-20	0.996039
ItbNAC110	itb02g15250.t4	3.53593e-18	0.993043
ItbNAC110	itb06g12880.t3	5.91738e-22	0.997357
ItbNAC110	itb02g09020.t1	3.06366e-17	0.99115
ItbNAC110	itb12g00690.t2	1.59004e-22	0.997716
ItbNAC110	itb07g04230.t3	7.55909e-17	0.990212
ItbNAC110	itb09g08310.t4	9.45999e-21	0.996403
ItbNAC110	itb15g10710.t1	1.6733e-17	0.991727
ItbNAC110	itb12g09120.t2	9.99729e-21	0.99638
ItbNAC110	itb05g02000.t1	2.2766e-23	0.99816
ItbNAC110	itb05g18590.t1	1.39498e-20	0.996244
ItbNAC110	ItbNAC50	5.51865e-18	0.992689
ItbNAC110	itb01g24280.t1	1.17185e-20	0.996316
ItbNAC110	itb14g18270.t2	9.6134e-21	0.996396
ItbNAC110	itb06g13750.t1	2.33296e-18	0.993358
ItbNAC110	itb07g23330.t1	9.45346e-21	0.996403
ItbNAC110	itb06g06710.t2	9.46554e-21	0.996402
ItbNAC110	itb08g16490.t3	1.31935e-20	0.996267
ItbNAC110	itb04g07840.t5	9.84396e-20	0.995331
ItbNAC110	itb07g22690.t2	2.26911e-20	0.996035
ItbNAC110	itb10g02470.t1	1.08032e-17	0.992121
ItbNAC110	itb03g18800.t5	3.07451e-20	0.995898
ItbNAC110	itb08g00910.t1	1.23596e-19	0.995211
ItbNAC110	itb05g18080.t1	9.45346e-21	0.996403
ItbNAC110	itb10g23520.t2	1.56973e-17	0.991786
ItbNAC110	itb04g03720.t1	9.1319e-19	0.994017
ItbNAC110	itb12g16050.t1	9.45346e-21	0.996403
ItbNAC110	itb08g13120.t1	3.85643e-22	0.99748
ItbNAC110	itb08g06470.t3	5.71084e-20	0.995606
ItbNAC110	itb01g29080.t1	7.1713e-20	0.995493
ItbNAC110	itb05g24510.t4	9.45347e-21	0.996403
ItbNAC110	itb04g04140.t4	1.18144e-19	0.995235
ItbNAC110	itb03g23720.t1	9.58722e-21	0.996397
ItbNAC110	itb06g07210.t1	8.81842e-17	0.990042
ItbNAC110	itb10g23030.t1	5.98401e-23	0.997952
ItbNAC110	itb15g04220.t2	1.07542e-20	0.996351
ItbNAC110	itb08g08770.t1	9.45346e-21	0.996403
ItbNAC110	itb02g10910.t1	3.64232e-20	0.99582
ItbNAC110	itb04g09450.t2	1.35346e-20	0.996256
ItbNAC110	itb14g21740.t1	9.77629e-21	0.996389
ItbNAC110	itb09g26250.t5	9.22338e-21	0.996413
ItbNAC110	itb10g23920.t6	9.4873e-21	0.996401
ItbNAC110	itb07g24020.t1	7.01597e-18	0.992491
ItbNAC110	itb02g14460.t3	1.514e-19	0.995102
ItbNAC110	itb12g09130.t1	1.09832e-21	0.997169
ItbNAC110	itb10g25260.t1	1.3091e-17	0.99195
ItbNAC110	itb05g09020.t1	9.45346e-21	0.996403
ItbNAC110	itb03g10300.t1	7.04743e-18	0.992487
ItbNAC110	itb01g21740.t1	5.36096e-17	0.99058
ItbNAC110	itb02g00080.t1	7.66857e-21	0.996486
ItbNAC110	itb05g28240.t1	5.20155e-21	0.996634
ItbNAC110	itb14g07330.t4	3.44341e-18	0.993063
ItbNAC110	itb07g02810.t1	6.83882e-20	0.995517
ItbNAC110	itb04g09450.t5	9.46723e-21	0.996402
ItbNAC110	itb03g08840.t4	7.96324e-17	0.990155
ItbNAC110	itb06g00770.t1	9.45346e-21	0.996403
ItbNAC110	itb13g03720.t3	9.57885e-21	0.996398
ItbNAC110	itb10g00660.t5	4.43957e-19	0.994479
ItbNAC110	itb08g04370.t1	4.19171e-22	0.997457
ItbNAC110	itb09g17960.t1	7.13855e-22	0.997301
ItbNAC110	itb02g26160.t9	9.83428e-21	0.996387
ItbNAC110	itb05g28460.t1	9.45346e-21	0.996403
ItbNAC110	itb05g20810.t1	3.29983e-17	0.991076
ItbNAC110	itb04g25780.t2	2.32912e-17	0.991416
ItbNAC110	itb04g16430.t2	8.61026e-21	0.99644
ItbNAC110	itb01g29720.t2	9.78944e-21	0.996389
ItbNAC110	itb12g19680.t3	1.03376e-21	0.997188
ItbNAC110	itb04g29220.t1	9.45346e-21	0.996403
ItbNAC110	itb02g11270.t5	3.91053e-21	0.996739
ItbNAC110	itb11g14610.t1	5.88243e-27	0.999266
ItbNAC110	itb15g18150.t1	9.45346e-21	0.996403
ItbNAC110	itb01g13080.t1	4.90482e-18	0.992785
ItbNAC110	itb05g16360.t1	9.491e-21	0.996401
ItbNAC110	itb06g12880.t1	1.29626e-20	0.996274
ItbNAC110	itb08g15210.t1	9.96566e-21	0.996382
ItbNAC110	itb08g07590.t2	5.13133e-20	0.995658
ItbNAC110	itb14g07300.t7	4.30812e-18	0.992888
ItbNAC110	itb12g28390.t1	9.45346e-21	0.996403
ItbNAC110	itb13g04020.t1	2.84316e-19	0.994746
ItbNAC110	itb04g09450.t3	9.45346e-21	0.996403
ItbNAC110	itb09g03740.t1	3.08551e-21	0.996824
ItbNAC110	itb15g21970.t1	1.66517e-21	0.997035
ItbNAC110	itb12g17690.t2	6.34019e-20	0.995554
ItbNAC110	itb11g03490.t4	3.1178e-22	0.997539
ItbNAC110	itb15g16480.t1	9.45346e-21	0.996403
ItbNAC110	itb15g20500.t2	9.45346e-21	0.996403
ItbNAC110	itb13g19570.t3	1.11681e-20	0.996335
ItbNAC110	itb10g20110.t2	6.59779e-17	0.990359
ItbNAC110	itb02g11840.t1	2.43708e-22	0.997605
ItbNAC110	itb09g12420.t5	8.14462e-19	0.994093
ItbNAC110	itb01g31080.t1	9.45346e-21	0.996403
ItbNAC110	itb09g07180.t2	9.45384e-21	0.996403
ItbNAC110	itb10g26170.t1	9.45346e-21	0.996403
ItbNAC110	itb10g07720.t1	9.45346e-21	0.996403
ItbNAC110	itb08g14580.t1	9.45346e-21	0.996403
ItbNAC110	itb04g23810.t1	9.45346e-21	0.996403
ItbNAC110	itb05g23420.t1	9.4983e-21	0.996401
ItbNAC110	itb14g19320.t1	1.02986e-20	0.996368
ItbNAC110	itb09g04890.t1	9.45346e-21	0.996403
ItbNAC110	itb10g15910.t4	1.1689e-19	0.995241
ItbNAC110	itb15g09040.t1	4.90425e-19	0.994417
ItbNAC110	itb15g08560.t1	5.61197e-20	0.995614
ItbNAC110	itb09g26250.t2	2.82953e-21	0.996855
ItbNAC110	itb12g13150.t2	6.41577e-18	0.992565
ItbNAC110	itb15g00310.t1	6.22828e-21	0.996566
ItbNAC110	itb14g16590.t1	1.70095e-20	0.99616
ItbNAC110	itb01g11590.t1	9.06899e-21	0.996419
ItbNAC110	itb09g26130.t1	9.45346e-21	0.996403
ItbNAC110	itb13g21390.t1	5.9947e-20	0.995582
ItbNAC110	itb03g27370.t1	2.05389e-22	0.997651
ItbNAC110	itb01g17750.t1	2.06166e-17	0.991532
ItbNAC110	itb02g16750.t1	4.28719e-18	0.992892
ItbNAC110	itb05g23020.t1	5.13485e-17	0.990625
ItbNAC110	itb02g10740.t1	2.35558e-21	0.996918
ItbNAC110	itb13g03720.t1	6.03001e-20	0.995579
ItbNAC110	itb14g21350.t1	9.46023e-21	0.996403
ItbNAC110	itb01g35970.t1	4.29202e-21	0.996705
ItbNAC110	itb12g00330.t3	9.53809e-21	0.996399
ItbNAC110	itb02g13210.t3	4.66677e-17	0.990725
ItbNAC110	itb13g06140.t1	3.64788e-17	0.990976
ItbNAC110	itb13g14850.t5	9.45346e-21	0.996403
ItbNAC110	itb02g09560.t1	2.3776e-22	0.997612
ItbNAC110	ItbNAC75	9.45346e-21	0.996403
ItbNAC110	itb03g14690.t1	1.37967e-18	0.993735
ItbNAC110	itb12g26910.t2	2.37037e-18	0.993346
ItbNAC110	itb12g23270.t2	5.58688e-19	0.994335
ItbNAC110	itb05g27220.t1	1.88569e-19	0.994981
ItbNAC110	itb04g10610.t1	1.59178e-20	0.996188
ItbNAC110	itb10g04220.t1	2.66084e-24	0.998551
ItbNAC110	itb11g03490.t3	8.51769e-27	0.999235
ItbNAC110	itb09g14620.t3	3.23648e-20	0.995875
ItbNAC110	itb12g13140.t1	5.8143e-25	0.998776
ItbNAC110	itb01g16770.t3	2.82917e-21	0.996855
ItbNAC110	itb13g20450.t18	1.19854e-20	0.996307
ItbNAC110	itb12g27890.t2	9.05082e-21	0.99642
ItbNAC110	itb05g01560.t1	8.70314e-21	0.996436
ItbNAC110	itb13g13530.t1	3.9957e-19	0.994543
ItbNAC110	itb05g16290.t1	3.17219e-19	0.994681
ItbNAC110	itb06g15440.t3	9.41612e-21	0.996404
ItbNAC110	itb05g17170.t5	1.01703e-20	0.996373
ItbNAC110	itb10g02270.t1	9.45346e-21	0.996403
ItbNAC110	itb04g24640.t2	9.44517e-21	0.996403
ItbNAC110	itb08g11240.t1	9.45346e-21	0.996403
ItbNAC110	itb09g03870.t6	9.71599e-21	0.996392
ItbNAC110	itb03g25860.t1	9.45346e-21	0.996403
ItbNAC110	itb03g06630.t1	9.45346e-21	0.996403
ItbNAC110	itb03g09530.t1	9.45346e-21	0.996403
ItbNAC110	itb09g14620.t4	3.30297e-17	0.991075
ItbNAC110	itb10g00660.t3	1.34577e-17	0.991925
ItbNAC110	itb10g18110.t1	9.45346e-21	0.996403
ItbNAC110	itb02g05190.t1	2.04283e-18	0.993455
ItbNAC110	itb11g11210.t1	6.38622e-21	0.996556
ItbNAC110	itb07g23160.t1	9.45346e-21	0.996403
ItbNAC110	itb09g09960.t1	1.89518e-17	0.991611
ItbNAC110	itb05g26420.t2	9.41208e-21	0.996405
ItbNAC110	itb03g07880.t1	1.05832e-19	0.995293
ItbNAC110	itb13g08120.t1	9.45346e-21	0.996403
ItbNAC110	itb04g29040.t8	9.45516e-21	0.996403
ItbNAC110	itb14g03610.t1	1.91513e-22	0.997669
ItbNAC110	itb10g18480.t1	6.88083e-21	0.996528
ItbNAC110	itb01g33160.t1	2.69582e-18	0.99325
ItbNAC110	itb09g17940.t2	6.22805e-25	0.998767
ItbNAC110	itb11g05480.t1	7.96947e-21	0.996471
ItbNAC110	itb09g01720.t2	9.30352e-21	0.996409
ItbNAC110	itb10g02630.t1	9.08007e-25	0.998714
ItbNAC110	itb07g22080.t2	9.62707e-21	0.996396
ItbNAC110	itb13g03720.t4	9.47443e-21	0.996402
ItbNAC110	itb06g19250.t4	1.68475e-19	0.995043
ItbNAC110	itb10g19900.t1	3.04613e-18	0.993158
ItbNAC110	itb08g06470.t4	7.89594e-18	0.992391
ItbNAC110	itb06g06710.t3	9.27529e-21	0.99641
ItbNAC110	itb05g24860.t1	4.18547e-18	0.992911
ItbNAC110	itb10g15910.t1	8.77734e-21	0.996432
ItbNAC110	itb12g13850.t3	1.02688e-20	0.99637
ItbNAC110	itb13g02510.t1	4.49465e-19	0.994471
ItbNAC110	itb10g12690.t1	7.46752e-18	0.992438
ItbNAC110	itb01g07300.t1	1.77562e-19	0.995014
ItbNAC110	itb03g16340.t1	1.42837e-18	0.993711
ItbNAC110	itb09g10130.t1	9.45346e-21	0.996403
ItbNAC110	itb04g08710.t3	9.45376e-21	0.996403
ItbNAC110	itb10g02640.t1	5.86545e-24	0.998418
ItbNAC110	itb09g12390.t1	9.45346e-21	0.996403
ItbNAC110	itb04g30620.t1	8.33473e-22	0.997254
ItbNAC110	itb04g29380.t1	8.72101e-19	0.994047
ItbNAC110	itb05g00420.t1	6.13791e-19	0.994276
ItbNAC110	itb07g07200.t2	6.44478e-21	0.996553
ItbNAC110	itb03g10850.t5	2.74868e-22	0.997573
ItbNAC110	itb07g17430.t1	9.45346e-21	0.996403
ItbNAC110	itb13g00790.t1	5.58488e-20	0.995617
ItbNAC110	itb01g35410.t1	1.51912e-22	0.997728
ItbNAC110	itb12g00690.t1	4.55e-25	0.998809
ItbNAC110	itb14g03440.t2	1.80696e-18	0.993544
ItbNAC110	itb03g10610.t2	4.79677e-21	0.996664
ItbNAC110	itb14g15640.t2	9.79392e-19	0.99397
ItbNAC110	itb08g05180.t1	4.53514e-18	0.992847
ItbNAC110	itb05g18730.t4	1.80181e-20	0.996135
ItbNAC110	itb08g08910.t2	9.45511e-21	0.996403
ItbNAC110	itb11g12240.t1	4.65019e-19	0.99445
ItbNAC110	itb13g20450.t17	9.62436e-21	0.996396
ItbNAC110	itb12g27890.t5	9.54185e-21	0.996399
ItbNAC110	itb10g02550.t1	1.75025e-26	0.999171
ItbNAC110	itb10g23480.t3	1.06172e-19	0.995292
ItbNAC110	itb12g16170.t1	9.45346e-21	0.996403
ItbNAC110	itb13g20450.t7	9.64285e-21	0.996395
ItbNAC110	itb12g19180.t1	9.45346e-21	0.996403
ItbNAC110	itb02g03900.t1	1.95586e-28	0.999497
ItbNAC110	itb03g01170.t3	2.08498e-20	0.996072
ItbNAC110	itb11g07020.t2	3.16722e-17	0.991117
ItbNAC110	itb09g29110.t1	2.70719e-18	0.993247
ItbNAC110	itb05g01370.t2	9.16295e-19	0.994015
ItbNAC110	itb02g00070.t1	9.45346e-21	0.996403
ItbNAC110	itb03g01600.t1	7.61202e-22	0.997282
ItbNAC110	itb08g02400.t2	4.37405e-20	0.995734
ItbNAC110	itb15g12060.t2	2.90773e-19	0.994733
ItbNAC110	itb03g09220.t3	3.44823e-18	0.993062
ItbNAC110	itb12g27890.t1	6.13216e-20	0.995571
ItbNAC110	itb12g27130.t6	9.45346e-21	0.996403
ItbNAC110	itb01g10670.t1	1.10767e-20	0.996339
ItbNAC110	itb01g03740.t1	4.25966e-22	0.997452
ItbNAC110	itb09g07680.t1	9.5577e-21	0.996398
ItbNAC110	itb04g28960.t1	6.87154e-21	0.996528
ItbNAC110	itb11g03490.t6	2.99014e-23	0.998104
ItbNAC110	itb01g10670.t2	9.45347e-21	0.996403
ItbNAC110	itb14g11440.t2	1.70201e-20	0.99616
ItbNAC110	itb04g07340.t1	1.80329e-22	0.997684
ItbNAC110	itb02g09220.t2	8.17051e-19	0.994091
ItbNAC110	itb02g03120.t2	7.92746e-17	0.99016
ItbNAC110	itb02g06800.t1	1.01292e-18	0.993947
ItbNAC110	itb07g09100.t1	9.45346e-21	0.996403
ItbNAC110	itb12g13220.t2	7.84062e-26	0.999021
ItbNAC110	itb09g18090.t1	9.29752e-21	0.996409
ItbNAC110	itb12g19680.t4	7.73069e-19	0.994127
ItbNAC110	itb02g10480.t2	1.29986e-20	0.996273
ItbNAC110	itb06g16750.t1	7.5765e-20	0.995465
ItbNAC110	itb07g24310.t7	1.82575e-18	0.993537
ItbNAC110	itb09g08030.t1	9.03042e-17	0.990016
ItbNAC110	itb11g14610.t2	5.97538e-23	0.997952
ItbNAC110	itb11g19670.t1	9.45346e-21	0.996403
ItbNAC110	itb05g16360.t2	4.00361e-18	0.992946
ItbNAC110	itb09g00410.t2	9.06338e-17	0.990012
ItbNAC110	itb06g00590.t2	5.77371e-20	0.9956
ItbNAC110	itb02g12380.t2	9.71965e-21	0.996392
ItbNAC110	itb01g10580.t2	2.83153e-18	0.993213
ItbNAC110	itb11g11670.t2	9.43818e-21	0.996403
ItbNAC110	itb09g02680.t1	2.2148e-22	0.997631
ItbNAC110	itb10g02540.t1	4.54259e-22	0.997434
ItbNAC110	itb06g03830.t1	6.40345e-24	0.998402
ItbNAC110	itb10g11320.t2	1.00153e-20	0.99638
ItbNAC110	itb02g12620.t2	9.5701e-21	0.996398
ItbNAC110	itb07g02200.t4	2.40062e-17	0.991387
ItbNAC110	itb05g12970.t1	9.45346e-21	0.996403
ItbNAC110	itb07g08620.t1	2.98514e-20	0.995912
ItbNAC110	itb09g13200.t1	2.25436e-20	0.996038
ItbNAC110	itb04g29870.t1	2.13813e-25	0.998905
ItbNAC110	itb12g01080.t1	9.50207e-21	0.996401
ItbNAC110	itb01g27350.t1	1.95396e-19	0.994961
ItbNAC110	itb03g06630.t2	9.45346e-21	0.996403
ItbNAC110	itb09g07250.t1	5.95273e-17	0.990469
ItbNAC110	itb12g27130.t2	9.45686e-21	0.996403
ItbNAC110	itb13g22050.t1	2.51823e-18	0.993301
ItbNAC110	itb07g18280.t1	9.45346e-21	0.996403
ItbNAC110	itb11g01900.t2	9.36253e-18	0.992245
ItbNAC110	itb15g11810.t2	6.36771e-21	0.996558
ItbNAC110	itb14g01350.t3	9.45563e-21	0.996403
ItbNAC110	itb07g23150.t1	9.45346e-21	0.996403
ItbNAC110	itb12g23900.t3	9.46321e-21	0.996402
ItbNAC110	itb05g27940.t1	2.2794e-20	0.996033
ItbNAC110	itb08g08060.t2	4.58993e-20	0.995711
ItbNAC110	itb01g11590.t2	1.49686e-20	0.996214
ItbNAC110	itb03g25650.t2	5.66678e-21	0.996602
ItbNAC110	itb15g12000.t1	1.09171e-17	0.992112
ItbNAC110	itb01g19240.t1	9.45346e-21	0.996403
ItbNAC110	itb11g03490.t7	1.72945e-20	0.996153
ItbNAC110	itb06g22040.t4	9.00933e-21	0.996422
ItbNAC110	itb15g22920.t1	9.45346e-21	0.996403
ItbNAC110	itb06g05550.t11	9.45346e-21	0.996403
ItbNAC110	itb15g16570.t1	9.45346e-21	0.996403
ItbNAC110	itb03g23360.t1	9.45346e-21	0.996403
ItbNAC110	itb10g10750.t4	1.28925e-17	0.991964
ItbNAC110	itb03g18300.t2	9.45399e-21	0.996403
ItbNAC110	itb08g02400.t4	5.56081e-18	0.992683
ItbNAC110	itb09g01620.t1	3.38512e-18	0.993077
ItbNAC110	itb09g30890.t1	1.00656e-21	0.997196
ItbNAC110	itb01g06320.t1	6.49763e-22	0.997329
ItbNAC110	itb12g13180.t1	9.45346e-21	0.996403
ItbNAC110	itb04g28980.t1	9.45346e-21	0.996403
ItbNAC110	itb01g30550.t1	9.49442e-21	0.996401
ItbNAC110	itb09g18750.t1	5.99665e-19	0.994291
ItbNAC110	itb02g10910.t2	2.03124e-21	0.996968
ItbNAC110	itb11g09880.t1	7.76089e-18	0.992406
ItbNAC110	itb12g25560.t1	9.45346e-21	0.996403
ItbNAC110	itb15g22080.t2	8.87368e-21	0.996428
ItbNAC110	itb12g27890.t3	3.53197e-19	0.994617
ItbNAC110	itb01g03180.t1	9.45346e-21	0.996403
ItbNAC110	itb04g08030.t2	5.17182e-19	0.994384
ItbNAC110	itb06g21950.t1	9.61803e-21	0.996396
ItbNAC110	itb01g18010.t1	9.45346e-21	0.996403
ItbNAC110	itb04g11470.t1	9.45346e-21	0.996403
ItbNAC110	itb12g05560.t1	9.45346e-21	0.996403
ItbNAC110	itb14g18450.t1	9.45346e-21	0.996403
ItbNAC110	itb06g11670.t1	6.3999e-17	0.990392
ItbNAC110	itb06g19250.t6	8.24659e-21	0.996457
ItbNAC110	itb08g06470.t2	9.43867e-21	0.996403
ItbNAC110	itb10g01950.t1	9.45346e-21	0.996403
ItbNAC110	itb10g15110.t2	9.50538e-21	0.996401
ItbNAC110	itb13g14290.t1	4.95876e-19	0.99441
ItbNAC110	itb01g33620.t2	2.61679e-21	0.996882
ItbNAC110	itb01g07870.t1	9.45346e-21	0.996403
ItbNAC110	itb12g27130.t1	9.45527e-21	0.996403
ItbNAC110	itb15g11810.t1	3.04877e-25	0.998861
ItbNAC110	itb15g00030.t2	1.03551e-20	0.996366
ItbNAC110	itb13g21570.t3	9.45358e-21	0.996403
ItbNAC110	itb01g17020.t1	9.45346e-21	0.996403
ItbNAC110	itb07g22970.t1	9.45346e-21	0.996403
ItbNAC110	itb06g05830.t2	1.20976e-20	0.996303
ItbNAC110	itb02g03900.t3	3.48454e-19	0.994626
ItbNAC110	itb04g01980.t6	1.26335e-20	0.996285
ItbNAC110	itb05g11090.t1	9.45346e-21	0.996403
ItbNAC110	itb01g07350.t1	9.45346e-21	0.996403
ItbNAC110	itb07g03970.t6	2.84273e-22	0.997564
ItbNAC110	itb01g34520.t1	5.26282e-18	0.992728
ItbNAC110	itb04g16280.t1	9.45346e-21	0.996403
ItbNAC110	itb01g29000.t2	7.98318e-17	0.990152
ItbNAC110	itb09g07050.t1	4.18167e-22	0.997457
ItbNAC110	itb13g20450.t15	9.64949e-21	0.996395
ItbNAC110	itb05g01620.t2	6.04324e-19	0.994286
ItbNAC110	itb11g20770.t1	1.56852e-18	0.993645
ItbNAC110	itb01g10670.t3	9.45124e-21	0.996403
ItbNAC110	itb08g13850.t1	6.72461e-19	0.994217
ItbNAC110	itb06g19900.t1	1.24584e-20	0.996291
ItbNAC110	itb04g10810.t1	1.95097e-17	0.991584
ItbNAC110	itb02g09560.t3	1.60716e-20	0.996184
ItbNAC110	itb02g06170.t2	1.15805e-21	0.997152
ItbNAC110	itb10g02690.t1	3.95977e-21	0.996735
ItbNAC110	itb11g11180.t5	2.21177e-17	0.991466
ItbNAC110	itb12g13850.t5	9.73747e-21	0.996391

## Sheet: Sheet3
Supplementary file 3：Gene interaction network in ItfNACs
ItfNAC name	Interaction gene ID	P value	correlation coefficients (R)
ItfNAC58	itf12g27350.t2	3.03228e-12	0.951746
ItfNAC58	itf07g01990.t1	3.32518e-12	0.951311
ItfNAC58	itf06g10620.t1	3.00946e-14	0.969127
ItfNAC58	itf13g20420.t1	8.50325e-13	0.95735
ItfNAC58	itf03g17750.t1	2.21457e-13	0.962561
ItfNAC58	itf10g14460.t1	7.35315e-14	0.966346
ItfNAC58	itf08g14310.t1	1.42766e-12	0.955151
ItfNAC58	itf03g14830.t1	1.34177e-14	0.971441
ItfNAC58	itf12g23930.t1	1.35839e-13	0.96429
ItfNAC58	itf12g17940.t1	7.73838e-13	0.957738
ItfNAC58	itf14g01380.t1	2.65213e-12	0.95237
ItfNAC58	itf15g19400.t1	1.04096e-12	0.956505
ItfNAC58	itf09g06090.t1	3.96909e-14	0.968291
ItfNAC58	itf09g02000.t1	3.89053e-13	0.960462
ItfNAC58	itf01g24580.t1	6.26851e-16	0.978733
ItfNAC58	itf10g18590.t1	1.24002e-12	0.95576
ItfNAC58	itf14g03860.t1	3.73289e-12	0.95076
ItfNAC58	itf04g00400.t1	1.75935e-12	0.954232
ItfNAC58	itf12g15890.t1	1.38451e-15	0.97705
ItfNAC58	itf15g10620.t1	3.55977e-13	0.960801
ItfNAC58	itf03g01950.t1	1.42999e-15	0.976978
ItfNAC58	itf03g30810.t1	1.10922e-12	0.956236
ItfNAC58	itf11g03380.t2	6.13619e-14	0.966929
ItfNAC58	itf12g15880.t1	1.55873e-15	0.976787
ItfNAC58	itf01g02060.t4	1.53297e-12	0.95484
ItfNAC58	itf11g03840.t1	1.17729e-12	0.955982
ItfNAC58	itf12g16980.t1	2.92106e-12	0.951921
ItfNAC58	itf12g07860.t1	3.67738e-13	0.960677
ItfNAC58	itf00g34070.t1	1.47821e-15	0.976905
ItfNAC58	itf09g06130.t6	3.44562e-15	0.974946
ItfNAC58	itf15g07620.t1	8.46196e-13	0.95737
ItfNAC58	itf12g02710.t1	9.71635e-14	0.965428
ItfNAC58	itf15g01910.t1	1.96222e-13	0.962997
ItfNAC58	itf00g09200.t1	5.87719e-13	0.95885
ItfNAC58	itf01g03990.t1	9.23644e-13	0.957006
ItfNAC58	itf01g32680.t1	2.99596e-12	0.951802
ItfNAC58	itf12g21430.t1	2.99037e-12	0.951811
ItfNAC58	itf01g34440.t2	2.17811e-15	0.976028
ItfNAC58	itf10g09100.t1	3.76141e-14	0.968456
ItfNAC58	itf03g13910.t1	9.98797e-13	0.956679
ItfNAC58	itf15g06380.t2	9.38033e-13	0.956942
ItfNAC58	itf15g19420.t1	1.09689e-13	0.96502
ItfNAC58	itf11g20690.t1	3.76346e-13	0.960589
ItfNAC58	itf04g13530.t1	7.20928e-14	0.96641
ItfNAC58	itf03g14000.t1	3.47236e-12	0.951106
ItfNAC58	itf04g30300.t1	2.3534e-13	0.96234
ItfNAC58	itf03g21690.t1	2.82777e-12	0.952072
ItfNAC58	itf06g18240.t1	2.00823e-17	0.984714
ItfNAC58	itf11g03380.t1	6.92248e-14	0.966542
ItfNAC54	itf01g33910.t1	3.39878e-12	0.951207
ItfNAC106	itf01g30840.t1	4.19922e-12	0.950193
ItfNAC106	itf10g24530.t1	5.31056e-13	0.959252
ItfNAC106	itf13g20650.t1	2.05518e-12	0.953536
ItfNAC106	itf01g02060.t4	3.46588e-13	0.960902
ItfNAC107	itf11g05670.t1	5.69875e-17	0.983106
ItfNAC107	itf15g07570.t1	3.73219e-13	0.960621
ItfNAC107	itf09g01190.t2	6.97951e-13	0.958159
ItfNAC107	itf02g07520.t1	2.62054e-12	0.952425
ItfNAC107	itf03g04660.t1	2.08253e-15	0.976131
ItfNAC107	itf05g02870.t1	3.09784e-15	0.975201
ItfNAC107	itf13g07190.t1	8.97829e-13	0.957124
ItfNAC107	itf03g25740.t1	5.00065e-13	0.959489
ItfNAC107	itf14g01640.t1	4.79349e-13	0.959655
ItfNAC107	itf02g01270.t1	7.28485e-14	0.966377
ItfNAC107	itf08g04020.t1	1.075e-13	0.965088
ItfNAC107	itf01g04600.t1	1.32081e-13	0.964386
ItfNAC107	itf08g01360.t1	9.13773e-16	0.977949
ItfNAC107	itf10g20470.t1	9.5918e-13	0.956849
ItfNAC66	ItfNAC9	1.21636e-20	0.992476
ItfNAC66	itf15g04180.t1	2.79897e-12	0.95212
ItfNAC66	itf00g02030.t1	4.88408e-13	0.959581
ItfNAC71	itf09g16150.t1	1.86489e-12	0.953972
ItfNAC71	itf04g32220.t1	1.56689e-12	0.954744
ItfNAC71	itf07g23820.t1	1.38318e-13	0.964227
ItfNAC71	itf15g05280.t1	9.06988e-13	0.957082
ItfNAC71	itf03g21450.t1	1.48536e-13	0.96398
ItfNAC71	itf04g15340.t1	1.52449e-12	0.954864
ItfNAC71	itf15g11020.t1	6.47445e-14	0.966757
ItfNAC71	itf06g24050.t1	2.41369e-13	0.962248
ItfNAC71	itf01g07780.t1	2.50007e-12	0.952642
ItfNAC71	itf07g04110.t1	1.67193e-12	0.954458
ItfNAC71	itf13g05900.t1	1.23587e-12	0.955774
ItfNAC71	itf10g16230.t1	2.44919e-13	0.962194
ItfNAC71	itf06g13740.t1	8.46759e-14	0.965884
ItfNAC71	itf08g11100.t1	6.86824e-13	0.958224
ItfNAC71	itf08g12110.t1	3.0987e-12	0.951644
ItfNAC71	itf15g04730.t1	5.34191e-14	0.967369
ItfNAC71	itf01g30550.t1	4.00399e-12	0.950424
ItfNAC71	itf05g08040.t1	5.67542e-13	0.958989
ItfNAC71	itf11g06900.t1	6.96693e-13	0.958166
ItfNAC17	itf07g06650.t1	5.83706e-14	0.967089
ItfNAC17	itf15g11350.t1	2.84458e-12	0.952045
ItfNAC17	itf11g04680.t1	6.2906e-14	0.96685
ItfNAC17	itf12g11220.t1	2.51445e-12	0.952616
ItfNAC17	itf04g04410.t1	2.96506e-14	0.969171
ItfNAC17	itf12g05520.t1	2.02204e-12	0.953609
ItfNAC17	itf09g06090.t2	2.18319e-12	0.953262
ItfNAC17	ItfNAC59	2.07053e-12	0.953502
ItfNAC17	itf07g15800.t1	3.83496e-12	0.950631
ItfNAC17	itf03g01000.t1	4.64888e-13	0.959774
ItfNAC17	itf12g25400.t3	3.00555e-12	0.951787
ItfNAC17	itf03g21690.t1	1.42034e-12	0.955173
ItfNAC17	itf06g21640.t1	3.45375e-12	0.951131
ItfNAC102	itf04g07250.t1	1.17238e-16	0.981895
ItfNAC102	itf14g17200.t9	1.68216e-12	0.954431
ItfNAC102	itf06g26310.t1	6.47322e-14	0.966758
ItfNAC102	itf10g02660.t1	8.17377e-14	0.966001
ItfNAC102	itf01g30330.t3	1.7948e-14	0.970629
ItfNAC102	itf14g15470.t3	1.85006e-12	0.954008
ItfNAC102	itf00g21910.t1	9.13217e-13	0.957054
ItfNAC102	itf12g23440.t1	2.43413e-14	0.969753
ItfNAC102	itf12g27350.t1	2.43111e-12	0.952771
ItfNAC102	itf02g09950.t1	3.05642e-12	0.951708
ItfNAC102	itf01g31690.t1	2.11792e-15	0.976092
ItfNAC102	itf03g24920.t1	1.50316e-12	0.954926
ItfNAC130	itf12g19280.t1	5.93396e-13	0.958812
ItfNAC59	itf07g01990.t1	2.12217e-14	0.97015
ItfNAC59	itf10g14460.t1	2.70251e-12	0.952283
ItfNAC59	itf07g06650.t1	1.9761e-14	0.970355
ItfNAC59	itf03g14720.t1	1.09541e-15	0.977561
ItfNAC59	itf11g04680.t1	1.17849e-13	0.964777
ItfNAC59	itf12g11220.t1	1.91499e-14	0.970444
ItfNAC59	ItfNAC17	2.07053e-12	0.953502
ItfNAC59	itf09g06090.t2	3.32467e-12	0.951312
ItfNAC59	itf06g21640.t2	4.47466e-13	0.959923
ItfNAC59	itf07g15800.t1	1.23484e-13	0.964617
ItfNAC59	itf03g01000.t1	5.85964e-14	0.967076
ItfNAC59	itf15g06380.t2	1.16734e-13	0.964809
ItfNAC59	itf12g17900.t1	2.69482e-13	0.961843
ItfNAC59	itf01g00320.t2	4.4634e-14	0.96793
ItfNAC59	itf03g21690.t1	5.12627e-13	0.959391
ItfNAC59	itf06g18240.t1	3.56519e-12	0.95098
ItfNAC59	itf03g18310.t1	3.65268e-13	0.960703
ItfNAC59	itf06g21640.t1	6.15655e-16	0.97877
ItfNAC9	ItfNAC66	1.21636e-20	0.992476
ItfNAC37	itf12g17880.t1	4.54825e-14	0.967872
ItfNAC37	itf07g07290.t1	3.46694e-12	0.951113
ItfNAC37	itf10g16000.t1	7.61188e-13	0.957805
ItfNAC37	itf10g00610.t2	1.37496e-13	0.964248
ItfNAC37	itf07g22910.t1	2.03904e-13	0.962859
ItfNAC37	itf01g35410.t2	2.08619e-14	0.970199
ItfNAC37	itf15g11350.t1	6.31225e-13	0.958564
ItfNAC37	itf01g21440.t1	6.41973e-13	0.958496
ItfNAC37	itf01g33910.t1	1.19696e-12	0.955911
ItfNAC37	itf06g09230.t6	1.47699e-14	0.971175
ItfNAC37	itf06g19570.t1	4.49979e-13	0.959901
ItfNAC37	itf12g03750.t1	7.2684e-13	0.957994
ItfNAC37	itf15g07620.t2	1.26289e-12	0.955681
ItfNAC37	itf12g05520.t1	2.01458e-12	0.953626
ItfNAC37	itf13g20470.t1	1.08496e-12	0.95633
ItfNAC37	itf06g24870.t1	2.38941e-12	0.95285
ItfNAC37	itf13g20690.t1	2.47516e-12	0.952689
ItfNAC37	itf06g18560.t1	3.89447e-12	0.950557
ItfNAC118	itf11g10940.t1	8.98928e-14	0.965687
ItfNAC118	itf08g12620.t1	1.67285e-13	0.963563
ItfNAC118	itf05g21050.t1	1.23637e-15	0.977298
ItfNAC118	itf03g12740.t1	9.72746e-13	0.95679
ItfNAC118	itf08g09050.t1	4.1048e-18	0.98687
ItfNAC118	itf12g19400.t1	3.03438e-17	0.984097
ItfNAC118	itf02g11750.t1	2.17426e-12	0.953281
ItfNAC118	itf12g23260.t1	1.83705e-14	0.970563
ItfNAC118	itf12g00780.t1	1.56542e-20	0.992292
ItfNAC118	itf06g01170.t1	8.24869e-16	0.978164
ItfNAC118	itf03g02930.t1	9.96806e-20	0.990801
ItfNAC118	itf15g05600.t1	5.95434e-15	0.973591
ItfNAC118	itf01g31670.t1	3.41104e-12	0.95119
ItfNAC118	itf01g31520.t1	3.62907e-21	0.993297
ItfNAC118	itf11g21360.t1	4.56309e-14	0.967862
ItfNAC118	itf05g24220.t1	1.05713e-17	0.985625
ItfNAC118	itf03g14940.t1	1.21938e-13	0.964661
ItfNAC118	itf15g18280.t1	2.08121e-13	0.962785
ItfNAC118	itf01g31250.t1	2.41358e-12	0.952804
ItfNAC118	itf10g18820.t1	6.94426e-16	0.978523
ItfNAC118	itf04g00240.t1	2.25731e-12	0.95311
ItfNAC118	itf13g17230.t1	3.23202e-15	0.9751
ItfNAC118	itf08g17240.t1	2.05862e-14	0.970238
ItfNAC118	itf05g17080.t1	5.89846e-13	0.958836
ItfNAC118	itf06g16870.t1	4.96e-15	0.974052
ItfNAC118	itf02g08570.t1	7.06188e-18	0.98617
ItfNAC118	itf09g16860.t1	2.57783e-19	0.989926
ItfNAC118	itf02g13770.t1	4.83306e-22	0.994471
ItfNAC118	itf05g21470.t1	1.49449e-15	0.97688
ItfNAC118	itf02g13730.t1	2.76105e-14	0.969383
ItfNAC118	itf04g07710.t1	2.53897e-12	0.952571
ItfNAC118	itf08g04610.t1	7.05923e-15	0.973155
ItfNAC118	itf14g10050.t1	4.06192e-20	0.991557
ItfNAC118	itf03g28950.t1	2.86771e-17	0.984182
ItfNAC118	itf04g29960.t1	1.61176e-12	0.954619
ItfNAC118	itf02g07810.t1	5.02094e-15	0.974021
ItfNAC118	itf12g00920.t1	3.59192e-13	0.960767
ItfNAC118	itf01g33740.t1	3.11437e-16	0.980115
ItfNAC118	itf11g10530.t1	1.22582e-13	0.964643
ItfNAC118	itf14g12670.t1	2.86883e-12	0.952005
ItfNAC118	itf15g17020.t1	4.88099e-13	0.959584
ItfNAC118	itf15g11770.t1	4.91333e-13	0.959558
ItfNAC118	itf03g30550.t1	2.24195e-18	0.987609
ItfNAC118	itf09g02700.t1	3.22954e-17	0.984001
ItfNAC118	itf11g07210.t1	6.72897e-22	0.994293
ItfNAC118	itf04g04570.t1	9.01056e-14	0.965679
ItfNAC118	itf13g17540.t1	4.91873e-14	0.967628
ItfNAC118	itf11g13330.t1	5.45474e-17	0.983177
ItfNAC118	itf15g05000.t1	1.68203e-12	0.954431
ItfNAC118	itf02g07930.t3	1.2274e-13	0.964638
ItfNAC118	itf10g02920.t1	2.16452e-14	0.970093
ItfNAC118	itf14g00310.t1	1.97231e-12	0.953721
ItfNAC118	itf15g08030.t2	9.83381e-13	0.956744
ItfNAC118	itf02g10950.t1	1.65671e-13	0.963598
ItfNAC118	itf04g24600.t1	1.28067e-12	0.955621
ItfNAC118	itf13g13210.t1	7.51492e-15	0.972992
ItfNAC118	itf05g24200.t1	1.73028e-13	0.963444
ItfNAC14	itf12g07720.t1	1.97105e-12	0.953724
ItfNAC14	itf12g06640.t2	2.74771e-13	0.961771
ItfNAC14	itf15g11740.t7	4.42897e-13	0.959963
ItfNAC14	itf11g00670.t2	2.1222e-12	0.95339
ItfNAC14	itf07g17670.t1	1.11112e-12	0.956229
ItfNAC14	itf02g22060.t2	8.20373e-14	0.965989
ItfNAC14	itf14g06700.t1	2.18442e-18	0.98764
ItfNAC14	itf06g07790.t2	1.81943e-12	0.954082
ItfNAC14	itf09g01420.t2	5.91424e-13	0.958825
ItfNAC14	itf01g03330.t1	1.51655e-17	0.985119
ItfNAC74	itf12g01480.t1	2.14925e-12	0.953333
ItfNAC74	itf04g09330.t1	1.86374e-16	0.981072
ItfNAC74	itf08g03020.t1	6.52276e-15	0.973358
ItfNAC74	itf14g06850.t6	4.07386e-16	0.979595
ItfNAC74	itf02g20150.t1	1.703e-13	0.9635
ItfNAC74	itf04g12110.t1	9.75671e-15	0.972304
ItfNAC74	itf05g13030.t1	2.78888e-15	0.975451
ItfNAC74	itf12g02150.t1	3.09213e-15	0.975206
ItfNAC74	itf13g11860.t1	4.22202e-16	0.979525
ItfNAC74	itf02g12260.t1	6.57451e-14	0.966708
ItfNAC74	itf07g07450.t1	6.35736e-18	0.986309
ItfNAC74	itf04g01870.t1	1.24703e-15	0.977279
ItfNAC74	itf05g15060.t1	4.31323e-15	0.974398
ItfNAC74	itf10g12380.t1	8.1939e-15	0.972766
ItfNAC74	itf07g12230.t1	6.95802e-15	0.973192
ItfNAC74	itf00g30840.t1	1.205e-16	0.981847
ItfNAC74	itf01g07570.t1	1.31487e-13	0.964402
ItfNAC74	itf02g05880.t1	8.30243e-13	0.957448
ItfNAC74	itf05g18900.t2	1.20351e-15	0.977357
ItfNAC74	itf03g14040.t2	6.64173e-14	0.966675
ItfNAC74	itf03g20650.t1	6.86096e-16	0.978548
ItfNAC74	itf02g03080.t1	2.87908e-12	0.951988
ItfNAC74	itf11g08590.t1	2.5745e-13	0.962011
ItfNAC74	itf15g06930.t1	1.74167e-13	0.963421
ItfNAC74	itf05g11930.t1	4.43217e-16	0.97943
ItfNAC74	itf12g20040.t1	7.60164e-19	0.988828
ItfNAC74	itf07g02000.t1	3.62987e-13	0.960727
ItfNAC74	itf15g21290.t1	1.63891e-17	0.985008
ItfNAC74	itf14g00400.t1	8.7166e-13	0.957247
ItfNAC74	itf13g20640.t1	3.26575e-14	0.968883
ItfNAC74	itf15g11180.t1	1.29845e-12	0.955562
ItfNAC74	itf04g34230.t1	1.15315e-12	0.956071
ItfNAC74	itf08g12380.t2	3.59384e-16	0.97984
ItfNAC74	itf10g21360.t1	3.57017e-16	0.979852
ItfNAC74	itf02g10400.t1	6.20588e-13	0.958632
ItfNAC74	itf06g01740.t1	3.36248e-15	0.975005
ItfNAC74	itf03g09290.t1	1.73635e-15	0.976545
ItfNAC74	itf05g13900.t1	3.57017e-16	0.979852
ItfNAC74	itf05g12540.t1	8.29337e-14	0.965953
ItfNAC74	itf04g09190.t1	4.91628e-14	0.96763
ItfNAC74	itf09g04050.t2	1.48554e-12	0.954977
ItfNAC74	itf06g18450.t1	5.27333e-14	0.96741
ItfNAC74	itf01g19350.t1	3.09557e-12	0.951649
ItfNAC74	itf05g15900.t2	1.47011e-14	0.971188
ItfNAC74	itf00g39910.t1	9.47258e-14	0.965513
ItfNAC74	itf01g05260.t1	2.92179e-12	0.95192
ItfNAC74	itf06g26340.t1	4.82303e-13	0.959631
ItfNAC74	itf04g22440.t1	3.17716e-12	0.951526
ItfNAC74	itf09g13890.t1	3.12905e-16	0.980106
ItfNAC74	itf12g07450.t1	4.10234e-13	0.960259
ItfNAC74	itf03g05250.t2	2.97795e-12	0.95183
ItfNAC74	itf02g13940.t1	1.80236e-12	0.954124
ItfNAC74	itf01g19330.t1	3.57017e-16	0.979852
ItfNAC74	itf00g23360.t1	9.74053e-18	0.985738
ItfNAC74	itf01g00320.t1	6.50978e-14	0.96674
ItfNAC74	itf07g12890.t1	1.13142e-16	0.981957
ItfNAC74	itf05g23220.t1	9.52204e-13	0.956879
ItfNAC74	itf12g22170.t1	3.57017e-16	0.979852
ItfNAC74	itf14g14400.t1	2.3021e-17	0.984512
ItfNAC74	itf06g12000.t1	1.93415e-16	0.981004
ItfNAC74	itf13g15370.t1	2.96608e-14	0.96917
ItfNAC74	itf06g26170.t1	5.05911e-13	0.959443
ItfNAC74	itf12g01650.t1	3.57017e-16	0.979852
ItfNAC74	itf02g08700.t1	6.53759e-13	0.958423
ItfNAC74	itf03g14300.t1	3.57017e-16	0.979852
ItfNAC74	itf13g18390.t1	1.99482e-13	0.962938
ItfNAC74	itf05g22780.t1	1.64386e-16	0.981298
ItfNAC74	itf01g28770.t1	1.42068e-15	0.976993
ItfNAC74	itf13g12640.t1	3.60894e-16	0.979832
ItfNAC74	itf07g02770.t1	2.58712e-12	0.952485
ItfNAC74	itf01g02650.t1	1.78615e-13	0.963332
ItfNAC74	itf03g21600.t1	1.5662e-15	0.976776
ItfNAC74	itf02g10030.t1	6.10868e-18	0.986361
ItfNAC74	itf04g16660.t1	1.50539e-12	0.954919
ItfNAC74	itf02g15470.t1	1.59792e-14	0.970956
ItfNAC74	itf13g18350.t1	7.69436e-15	0.972931
ItfNAC74	itf03g22890.t1	2.54091e-18	0.98746
ItfNAC74	itf04g19190.t1	1.01095e-12	0.956628
ItfNAC74	itf10g17740.t1	1.78621e-13	0.963332
ItfNAC74	itf04g00640.t1	4.7502e-14	0.967737
ItfNAC74	itf04g11850.t1	1.10691e-16	0.981995
ItfNAC74	itf05g09510.t1	3.3765e-16	0.97996
ItfNAC74	itf05g23360.t1	9.80737e-16	0.977798
ItfNAC74	itf09g01910.t1	1.84691e-14	0.970547
ItfNAC74	itf05g08010.t1	1.59882e-15	0.97673
ItfNAC74	itf12g25420.t1	3.16371e-13	0.961246
ItfNAC74	itf09g06360.t1	9.53459e-15	0.972366
ItfNAC74	itf07g07470.t1	8.4831e-16	0.978106
ItfNAC74	itf07g07460.t1	6.00492e-15	0.97357
ItfNAC74	itf00g00430.t1	8.57935e-17	0.98243
ItfNAC74	itf09g09720.t1	2.25422e-13	0.962497
ItfNAC74	itf11g06460.t1	4.249e-13	0.960123
ItfNAC74	itf04g05790.t1	2.07043e-16	0.980879
ItfNAC74	itf06g04480.t1	1.75563e-12	0.954241
ItfNAC74	itf07g03880.t4	8.83206e-14	0.965745
ItfNAC74	itf12g24090.t1	1.27408e-17	0.985366
ItfNAC74	itf07g10980.t1	1.70359e-15	0.976587
ItfNAC74	itf15g04060.t1	4.69053e-13	0.959739
ItfNAC74	itf09g05450.t1	3.42307e-16	0.979934
ItfNAC74	itf09g17530.t1	8.66218e-16	0.978062
ItfNAC74	itf09g09700.t1	4.3893e-13	0.959998
ItfNAC74	itf05g02160.t1	7.05292e-16	0.978491
ItfNAC74	itf01g10160.t1	6.96163e-17	0.982778
ItfNAC74	itf07g00540.t2	1.57642e-23	0.996011
ItfNAC74	itf04g26050.t1	3.66392e-16	0.979802
ItfNAC74	itf06g22400.t1	3.6794e-14	0.968523
ItfNAC74	itf04g09320.t1	8.57514e-13	0.957315
ItfNAC74	itf00g09180.t1	1.32787e-15	0.977142
ItfNAC74	itf02g12480.t1	5.36839e-14	0.967353
ItfNAC74	itf08g13510.t1	1.01742e-14	0.972192
ItfNAC74	itf00g16800.t3	3.51703e-12	0.951045
ItfNAC74	itf04g30030.t1	2.26854e-16	0.980711
ItfNAC74	itf05g19400.t2	1.41354e-15	0.977004
ItfNAC74	itf06g20610.t1	6.14924e-18	0.986352
ItfNAC74	itf07g12990.t1	3.56516e-16	0.979855
ItfNAC74	itf07g09890.t1	2.18681e-13	0.962607
ItfNAC74	itf15g06550.t1	4.55896e-15	0.974261
ItfNAC74	itf11g14250.t1	4.9895e-17	0.98332
ItfNAC74	itf05g25250.t1	3.57017e-16	0.979852
ItfNAC74	itf15g10570.t2	7.3696e-16	0.9784
ItfNAC74	itf11g11000.t2	1.61191e-14	0.970931
ItfNAC74	itf07g07550.t1	1.57698e-13	0.963771
ItfNAC74	itf15g10610.t1	2.01786e-12	0.953618
ItfNAC74	itf03g17120.t1	3.57017e-16	0.979852
ItfNAC74	itf05g02130.t1	4.60101e-13	0.959815
ItfNAC74	itf06g16820.t1	1.25621e-12	0.955704
ItfNAC74	itf07g05510.t1	3.57017e-16	0.979852
ItfNAC74	itf03g00390.t1	2.0757e-14	0.970214
ItfNAC74	itf01g03550.t1	3.57017e-16	0.979852
ItfNAC74	itf01g03980.t1	1.89804e-16	0.981038
ItfNAC74	itf13g03350.t1	5.19428e-14	0.967457
ItfNAC74	itf07g02870.t1	3.39505e-16	0.97995
ItfNAC74	itf04g33620.t1	1.19401e-12	0.955922
ItfNAC74	itf05g11960.t1	1.39027e-16	0.981597
ItfNAC74	itf00g30830.t1	1.61195e-12	0.954619
ItfNAC74	itf05g06190.t1	1.55574e-14	0.971031
ItfNAC74	itf13g17220.t1	5.92936e-15	0.973602
ItfNAC74	itf02g07850.t1	1.31974e-14	0.971486
ItfNAC74	itf01g04280.t1	8.62527e-14	0.965823
ItfNAC74	itf09g08160.t1	4.91175e-15	0.974076
ItfNAC74	itf11g01320.t1	3.83246e-14	0.968399
ItfNAC74	itf02g05890.t1	3.69583e-16	0.979785
ItfNAC74	itf15g13350.t2	6.83494e-16	0.978555
ItfNAC74	itf08g07110.t1	3.37427e-12	0.951242
ItfNAC74	itf05g11950.t1	2.50131e-16	0.980529
ItfNAC74	itf02g12160.t1	1.49193e-13	0.963964
ItfNAC74	itf06g24400.t1	3.15489e-13	0.961256
ItfNAC74	itf11g14270.t1	1.69265e-15	0.976602
ItfNAC74	itf03g16570.t1	2.98118e-15	0.975293
ItfNAC74	itf10g17150.t3	1.90679e-16	0.98103
ItfNAC74	itf07g16480.t1	3.74865e-12	0.95074
ItfNAC74	itf08g04130.t1	2.40583e-13	0.96226
ItfNAC74	itf04g04100.t1	1.52874e-16	0.981428
ItfNAC74	itf03g00710.t1	6.93429e-15	0.973201
ItfNAC74	itf15g13350.t1	2.60573e-15	0.97561
ItfNAC74	itf02g21160.t1	5.92291e-15	0.973605
ItfNAC74	itf13g12020.t1	3.87558e-14	0.968364
ItfNAC74	itf02g24200.t1	4.17053e-17	0.983604
ItfNAC74	itf00g38080.t1	4.5051e-13	0.959896
ItfNAC74	itf10g17770.t1	1.37808e-12	0.955304
ItfNAC74	itf09g07510.t1	1.44218e-12	0.955107
ItfNAC74	itf02g24210.t1	4.69484e-17	0.983417
ItfNAC74	itf07g07480.t1	8.39181e-16	0.978128
ItfNAC74	itf09g25960.t2	1.84022e-14	0.970558
ItfNAC74	itf01g33100.t1	3.38522e-13	0.960991
ItfNAC74	itf09g04990.t1	1.20911e-12	0.955868
ItfNAC74	itf05g13050.t1	8.23886e-15	0.972752
ItfNAC74	itf02g03950.t1	7.61613e-14	0.966232
ItfNAC74	itf10g20490.t1	2.34726e-15	0.975854
ItfNAC74	itf02g13460.t1	1.84693e-13	0.963213
ItfNAC74	itf06g16470.t1	3.6107e-15	0.974833
ItfNAC74	itf05g18900.t1	1.22973e-15	0.97731
ItfNAC74	itf04g07450.t1	1.92865e-14	0.970424
ItfNAC74	itf05g02150.t1	4.0875e-15	0.97453
ItfNAC74	itf00g36940.t1	3.85809e-14	0.968378
ItfNAC74	itf08g05490.t1	3.57017e-16	0.979852
ItfNAC74	itf04g06710.t1	3.57017e-16	0.979852
ItfNAC74	itf13g15660.t1	3.57017e-16	0.979852
ItfNAC74	itf06g13820.t1	3.13057e-16	0.980105
ItfNAC74	itf07g15200.t1	1.39575e-12	0.955249
ItfNAC74	itf12g11350.t1	5.41829e-16	0.979029
ItfNAC74	itf03g07350.t1	2.17342e-14	0.970081
ItfNAC74	itf12g07810.t2	1.66749e-13	0.963575
ItfNAC74	itf02g14910.t1	1.65941e-14	0.97085
ItfNAC74	itf13g19630.t1	5.53107e-13	0.959091
ItfNAC74	itf11g01580.t1	3.088e-18	0.987223
ItfNAC74	itf05g20920.t1	5.03557e-13	0.959462
ItfNAC74	itf05g06180.t1	5.67549e-14	0.967178
ItfNAC74	itf12g21620.t1	2.15125e-13	0.962666
ItfNAC74	itf14g01420.t1	2.32598e-15	0.975876
ItfNAC74	itf04g06690.t1	1.96618e-12	0.953735
ItfNAC74	itf06g00340.t1	1.26559e-12	0.955672
ItfNAC74	itf07g12930.t1	5.7985e-14	0.96711
ItfNAC74	itf15g16710.t1	5.70623e-14	0.967161
ItfNAC74	itf07g12910.t1	2.58435e-13	0.961997
ItfNAC74	itf01g17910.t2	3.38037e-16	0.979958
ItfNAC74	itf14g14820.t1	1.52313e-12	0.954868
ItfNAC74	itf02g18410.t1	3.57017e-16	0.979852
ItfNAC74	itf09g05480.t1	1.8589e-13	0.96319
ItfNAC74	itf12g11100.t1	4.37903e-15	0.974361
ItfNAC74	itf12g06560.t1	3.8995e-15	0.974646
ItfNAC74	itf01g18030.t1	9.6321e-15	0.972339
ItfNAC74	itf03g16300.t1	3.5199e-15	0.974894
ItfNAC74	itf07g12950.t1	2.09347e-16	0.980859
ItfNAC74	itf14g10000.t1	1.85755e-12	0.95399
ItfNAC74	itf07g16140.t2	3.83306e-18	0.986956
ItfNAC74	itf13g20660.t1	1.31872e-15	0.977157
ItfNAC74	itf12g05390.t1	3.51954e-12	0.951041
ItfNAC74	itf11g00550.t1	1.29893e-15	0.97719
ItfNAC74	itf00g20620.t1	1.13894e-14	0.971888
ItfNAC74	itf12g01620.t1	1.13237e-12	0.956148
ItfNAC74	itf02g13450.t1	3.32445e-12	0.951312
ItfNAC74	itf09g07950.t1	2.19838e-14	0.970048
ItfNAC74	itf12g04690.t1	9.06861e-15	0.972499
ItfNAC74	itf09g09570.t1	2.91218e-16	0.980243
ItfNAC74	itf12g22510.t1	1.35686e-13	0.964294
ItfNAC74	itf15g05580.t1	7.3042e-13	0.957974
ItfNAC74	itf04g26160.t1	3.57017e-16	0.979852
ItfNAC74	itf12g04000.t1	1.14071e-16	0.981943
ItfNAC74	itf10g05870.t1	9.74386e-15	0.972308
ItfNAC74	itf01g00150.t1	9.42862e-17	0.98227
ItfNAC74	itf02g07650.t1	1.91803e-12	0.953846
ItfNAC74	itf11g00960.t1	5.73771e-16	0.978913
ItfNAC74	itf04g27440.t1	6.95623e-14	0.966526
ItfNAC74	itf13g05830.t1	1.64396e-16	0.981298
ItfNAC74	itf09g09730.t1	2.39166e-14	0.969804
ItfNAC74	itf09g09710.t1	4.90932e-13	0.959561
ItfNAC74	itf11g08240.t1	2.53369e-14	0.969636
ItfNAC74	itf03g19950.t1	8.55667e-16	0.978087
ItfNAC74	itf12g11640.t1	3.57017e-16	0.979852
ItfNAC74	itf11g03890.t1	1.15151e-17	0.985507
ItfNAC29	itf13g17170.t1	4.3488e-12	0.950023
ItfNAC55	itf09g07690.t1	2.13558e-18	0.987667
ItfNAC55	itf05g02720.t1	2.90027e-18	0.9873
ItfNAC55	itf08g02600.t1	9.01664e-14	0.965677
ItfNAC55	itf05g07740.t1	2.90027e-18	0.9873
ItfNAC55	itf11g07900.t4	2.88608e-18	0.987306
ItfNAC55	itf11g15700.t1	2.90027e-18	0.9873
ItfNAC55	itf07g21280.t3	2.7909e-18	0.987347
ItfNAC55	itf15g08820.t1	1.51637e-15	0.976848
ItfNAC55	itf03g07100.t1	1.7307e-18	0.987912
ItfNAC55	itf03g08210.t1	2.32005e-18	0.987568
ItfNAC55	itf03g25840.t17	2.40426e-16	0.980603
ItfNAC55	itf04g01310.t1	8.03282e-13	0.957584
ItfNAC55	itf06g09590.t3	4.23907e-14	0.968089
ItfNAC55	itf01g06770.t3	2.83239e-18	0.987329
ItfNAC55	itf08g05290.t1	5.64156e-16	0.978947
ItfNAC55	itf12g25180.t1	3.13418e-14	0.969006
ItfNAC55	itf09g16810.t1	2.90662e-15	0.975353
ItfNAC55	itf12g23270.t1	2.90027e-18	0.9873
ItfNAC55	itf01g30410.t1	6.41348e-18	0.986297
ItfNAC55	itf06g20520.t1	1.79854e-18	0.987868
ItfNAC55	itf13g16250.t2	1.40621e-14	0.971311
ItfNAC55	itf13g17190.t1	5.76548e-14	0.967128
ItfNAC55	itf10g20410.t1	1.44855e-16	0.981524
ItfNAC55	itf02g28820.t1	2.90027e-18	0.9873
ItfNAC55	itf06g07970.t1	4.4432e-18	0.98677
ItfNAC55	itf04g32230.t1	5.18887e-14	0.967461
ItfNAC55	itf05g22110.t2	2.92446e-18	0.98729
ItfNAC55	itf01g06810.t1	2.90027e-18	0.9873
ItfNAC55	itf10g20240.t1	3.98691e-14	0.968278
ItfNAC55	itf13g22710.t1	8.64917e-13	0.957279
ItfNAC55	itf12g02790.t1	4.82332e-17	0.983374
ItfNAC55	itf03g27990.t2	8.40162e-18	0.985938
ItfNAC55	itf02g15980.t1	1.41272e-12	0.955196
ItfNAC55	itf15g06570.t6	1.90294e-12	0.953882
ItfNAC55	itf07g21630.t1	2.90027e-18	0.9873
ItfNAC55	itf01g21360.t2	1.46632e-15	0.976923
ItfNAC55	itf00g28630.t1	6.26414e-14	0.966863
ItfNAC55	itf12g14660.t1	2.90027e-18	0.9873
ItfNAC55	itf10g18550.t1	7.73248e-16	0.9783
ItfNAC55	itf00g58420.t1	2.90027e-18	0.9873
ItfNAC55	itf05g25790.t2	1.72548e-15	0.976559
ItfNAC55	itf14g14030.t2	2.89524e-18	0.987302
ItfNAC55	itf06g22290.t1	3.33878e-18	0.987128
ItfNAC55	itf07g10430.t1	4.1962e-17	0.983595
ItfNAC55	itf15g11380.t2	2.97077e-13	0.961481
ItfNAC55	itf01g30420.t1	4.63922e-16	0.979339
ItfNAC55	itf04g18360.t1	2.90027e-18	0.9873
ItfNAC55	itf15g01320.t5	3.02548e-18	0.987248
ItfNAC55	itf06g14760.t1	7.57104e-19	0.988832
ItfNAC55	itf01g05850.t1	2.93659e-13	0.961524
ItfNAC55	itf11g20360.t3	1.58823e-17	0.985053
ItfNAC55	itf04g05370.t4	8.4953e-16	0.978103
ItfNAC55	itf13g07460.t1	2.90027e-18	0.9873
ItfNAC55	itf00g43790.t1	9.3673e-20	0.990855
ItfNAC55	itf11g00420.t1	3.02284e-17	0.984102
ItfNAC55	itf00g43060.t1	2.97021e-15	0.975301
ItfNAC55	itf03g08410.t1	6.36099e-14	0.966814
ItfNAC55	itf05g18440.t1	2.90027e-18	0.9873
ItfNAC55	itf15g23200.t2	2.64246e-14	0.969512
ItfNAC55	itf07g02260.t3	2.93161e-18	0.987287
ItfNAC55	itf02g10120.t5	2.93597e-14	0.969201
ItfNAC55	itf03g16160.t5	2.87599e-18	0.98731
ItfNAC55	itf03g04160.t1	4.57855e-13	0.959834
ItfNAC55	itf09g15640.t1	8.39989e-19	0.98872
ItfNAC55	itf09g11260.t2	4.13168e-18	0.986862
ItfNAC55	itf15g08840.t1	2.10618e-13	0.962742
ItfNAC55	itf05g17850.t2	1.74018e-13	0.963424
ItfNAC55	itf11g03490.t1	9.43057e-18	0.985782
ItfNAC55	itf12g25530.t2	2.90905e-18	0.987296
ItfNAC55	itf12g05990.t4	1.89129e-15	0.976351
ItfNAC55	itf11g21180.t1	1.39198e-14	0.97134
ItfNAC55	itf03g14340.t1	8.64905e-14	0.965814
ItfNAC55	itf09g11330.t3	4.18537e-12	0.950209
ItfNAC55	itf08g05640.t3	6.81004e-13	0.958258
ItfNAC55	itf09g14780.t1	2.90027e-18	0.9873
ItfNAC55	itf14g14130.t3	6.65942e-17	0.982851
ItfNAC55	itf02g06400.t1	2.88585e-13	0.961589
ItfNAC55	itf03g01080.t1	2.90027e-18	0.9873
ItfNAC55	itf12g24820.t1	2.90027e-18	0.9873
ItfNAC55	itf11g13020.t1	9.57269e-18	0.985761
ItfNAC55	itf09g04500.t1	2.90027e-18	0.9873
ItfNAC55	itf05g18540.t3	1.38819e-17	0.985245
ItfNAC55	itf13g14550.t1	1.03226e-17	0.985658
ItfNAC55	itf06g26040.t3	3.00076e-18	0.987258
ItfNAC55	itf02g04870.t4	2.80405e-12	0.952111
ItfNAC55	itf02g26510.t2	1.10248e-12	0.956262
ItfNAC55	itf11g08060.t2	8.63582e-16	0.978068
ItfNAC55	itf00g59160.t1	6.47785e-16	0.978666
ItfNAC55	itf01g26070.t1	2.47769e-13	0.962152
ItfNAC55	itf00g05480.t1	2.90027e-18	0.9873
ItfNAC55	itf12g15390.t1	1.97395e-14	0.970358
ItfNAC55	itf12g06630.t2	2.29824e-14	0.96992
ItfNAC55	itf06g12180.t4	4.21594e-14	0.968106
ItfNAC55	itf07g07020.t1	3.15289e-13	0.961259
ItfNAC55	itf05g22640.t1	2.90027e-18	0.9873
ItfNAC55	itf03g05780.t1	1.85613e-18	0.987831
ItfNAC55	itf03g08580.t1	2.01719e-14	0.970296
ItfNAC55	itf15g03640.t1	2.12216e-17	0.984632
ItfNAC55	itf15g03650.t1	1.70675e-17	0.98495
ItfNAC55	itf12g06000.t1	8.23481e-19	0.988742
ItfNAC55	itf02g14710.t1	2.90027e-18	0.9873
ItfNAC55	itf02g24560.t1	2.90027e-18	0.9873
ItfNAC55	itf15g04340.t1	2.16037e-14	0.970099
ItfNAC55	itf06g13760.t1	2.83532e-18	0.987327
ItfNAC55	itf01g06760.t1	2.90028e-18	0.9873
ItfNAC55	itf00g10960.t1	9.39596e-18	0.985787
ItfNAC55	itf02g17170.t3	1.59965e-16	0.981347
ItfNAC55	itf04g13810.t1	2.90027e-18	0.9873
ItfNAC55	itf01g03080.t1	1.72856e-16	0.981208
ItfNAC55	itf14g13500.t1	6.21512e-13	0.958626
ItfNAC55	itf14g09710.t2	2.10309e-13	0.962748
ItfNAC55	itf01g17000.t1	2.90027e-18	0.9873
ItfNAC55	itf11g07800.t1	3.15792e-18	0.987196
ItfNAC55	itf04g26040.t1	3.44247e-15	0.974948
ItfNAC55	itf13g18090.t2	3.98889e-12	0.950442
ItfNAC55	itf14g14130.t4	2.32896e-14	0.969881
ItfNAC55	itf00g25530.t1	2.90027e-18	0.9873
ItfNAC55	itf12g07320.t2	2.90271e-18	0.987299
ItfNAC55	itf10g04950.t1	2.67573e-18	0.987398
ItfNAC55	itf09g02160.t1	1.09255e-16	0.982017
ItfNAC55	itf05g21810.t1	1.35146e-14	0.971421
ItfNAC55	itf14g03210.t7	2.92222e-18	0.987291
ItfNAC55	itf14g02850.t4	1.1e-17	0.98557
ItfNAC55	itf02g17170.t2	6.27603e-16	0.97873
ItfNAC55	ItfNAC78	2.90027e-18	0.9873
ItfNAC55	itf06g27080.t1	2.90027e-18	0.9873
ItfNAC55	itf11g19660.t1	5.39158e-16	0.979039
ItfNAC55	itf12g26710.t1	2.31826e-15	0.975883
ItfNAC55	itf07g03700.t1	8.93418e-18	0.985855
ItfNAC55	itf04g02310.t1	4.16553e-18	0.986852
ItfNAC55	itf05g21810.t2	3.91061e-17	0.983705
ItfNAC55	itf05g14450.t1	1.51824e-13	0.963904
ItfNAC55	itf06g13060.t3	2.96105e-18	0.987275
ItfNAC55	itf15g01410.t1	1.02409e-13	0.965252
ItfNAC55	itf04g11670.t2	1.58073e-15	0.976755
ItfNAC55	itf05g23930.t1	1.0828e-15	0.977586
ItfNAC55	itf02g24700.t1	8.90044e-17	0.982368
ItfNAC55	itf12g05990.t3	2.48905e-13	0.962135
ItfNAC55	itf07g02440.t1	2.53828e-19	0.989941
ItfNAC55	itf08g00940.t1	3.92156e-14	0.968328
ItfNAC55	itf03g13930.t1	1.10884e-12	0.956237
ItfNAC55	itf12g05990.t2	2.6262e-15	0.975592
ItfNAC55	itf08g04350.t5	2.87976e-18	0.987309
ItfNAC55	itf00g17570.t1	2.90027e-18	0.9873
ItfNAC55	itf01g16960.t1	2.49666e-13	0.962124
ItfNAC55	itf02g21010.t1	2.90027e-18	0.9873
ItfNAC55	itf05g27260.t2	7.11123e-14	0.966455
ItfNAC55	itf08g16780.t1	2.90027e-18	0.9873
ItfNAC55	itf13g09180.t1	2.90027e-18	0.9873
ItfNAC55	itf01g07370.t1	2.733e-18	0.987372
ItfNAC55	itf03g05980.t1	2.45345e-17	0.984417
ItfNAC55	itf13g17160.t8	3.84034e-12	0.950624
ItfNAC55	itf03g19010.t1	3.79841e-13	0.960554
ItfNAC55	itf09g03380.t1	3.1284e-18	0.987208
ItfNAC55	itf08g13290.t1	2.90027e-18	0.9873
ItfNAC55	itf03g22420.t2	3.61515e-18	0.987029
ItfNAC55	itf11g08630.t1	6.47739e-15	0.973376
ItfNAC55	itf06g03520.t2	2.85374e-18	0.98732
ItfNAC55	itf02g11270.t3	3.20284e-18	0.987179
ItfNAC55	itf14g15040.t1	6.87768e-15	0.973222
ItfNAC55	itf06g00490.t1	2.90027e-18	0.9873
ItfNAC55	itf06g16690.t2	2.3292e-13	0.962378
ItfNAC55	itf14g06940.t11	5.31384e-18	0.986542
ItfNAC55	itf06g22100.t2	3.24101e-15	0.975093
ItfNAC55	itf03g07380.t1	3.47653e-12	0.9511
ItfNAC55	itf14g15780.t1	1.65291e-17	0.984996
ItfNAC55	itf15g06570.t15	1.08456e-16	0.98203
ItfNAC55	itf07g06760.t3	8.70447e-13	0.957253
ItfNAC55	itf02g17120.t2	7.15676e-18	0.986153
ItfNAC55	itf03g19800.t1	2.90027e-18	0.9873
ItfNAC55	itf12g21330.t1	1.88869e-14	0.970484
ItfNAC55	itf06g20530.t1	3.20189e-18	0.987179
ItfNAC55	itf12g03170.t2	2.7972e-15	0.975444
ItfNAC55	itf15g13150.t2	1.32758e-16	0.981678
ItfNAC55	itf00g30540.t1	2.90027e-18	0.9873
ItfNAC55	itf01g23830.t3	8.96367e-13	0.957131
ItfNAC55	itf07g22890.t1	3.8141e-13	0.960538
ItfNAC55	itf04g02310.t3	1.00687e-17	0.985692
ItfNAC55	itf01g16160.t3	1.42966e-16	0.981547
ItfNAC55	itf04g33400.t1	3.14206e-12	0.951579
ItfNAC55	itf03g09690.t3	2.09172e-12	0.953456
ItfNAC55	itf09g27160.t1	1.30812e-17	0.985329
ItfNAC55	itf09g04250.t4	4.16232e-16	0.979553
ItfNAC55	itf14g03060.t1	2.90027e-18	0.9873
ItfNAC55	itf08g06120.t1	6.4336e-17	0.982908
ItfNAC55	itf13g20450.t1	2.90027e-18	0.9873
ItfNAC55	itf00g57230.t1	2.90027e-18	0.9873
ItfNAC55	itf01g23040.t3	3.01016e-18	0.987255
ItfNAC55	itf13g19710.t1	2.90027e-18	0.9873
ItfNAC55	itf05g15000.t1	1.27073e-17	0.98537
ItfNAC55	itf05g02210.t1	2.90027e-18	0.9873
ItfNAC55	itf10g22580.t1	6.13003e-19	0.989055
ItfNAC55	itf06g22990.t1	2.08963e-13	0.962771
ItfNAC55	itf05g12930.t1	2.22273e-18	0.987619
ItfNAC55	itf04g08880.t1	2.90027e-18	0.9873
ItfNAC55	itf00g38430.t1	2.90027e-18	0.9873
ItfNAC55	itf08g05640.t2	4.08077e-18	0.986878
ItfNAC55	itf04g30720.t1	3.26351e-15	0.975076
ItfNAC55	itf09g22590.t1	9.3474e-14	0.965557
ItfNAC55	itf00g68570.t1	2.90027e-18	0.9873
ItfNAC55	itf02g10700.t5	2.58676e-18	0.987438
ItfNAC55	itf00g55490.t1	2.81084e-15	0.975432
ItfNAC55	itf07g06340.t2	5.58381e-13	0.959054
ItfNAC55	itf04g15270.t1	2.90027e-18	0.9873
ItfNAC55	itf02g13590.t1	4.42864e-13	0.959963
ItfNAC55	itf13g11410.t1	2.45451e-13	0.962187
ItfNAC55	itf15g11640.t1	4.15035e-19	0.989456
ItfNAC55	itf01g33360.t1	3.78231e-18	0.986973
ItfNAC55	itf04g17080.t2	2.89848e-18	0.987301
ItfNAC55	itf05g17480.t1	5.70139e-17	0.983105
ItfNAC55	itf03g21100.t1	2.90027e-18	0.9873
ItfNAC55	itf13g20300.t1	2.90027e-18	0.9873
ItfNAC55	itf05g27240.t1	3.28389e-12	0.95137
ItfNAC55	itf08g04210.t6	2.56344e-12	0.952527
ItfNAC55	itf05g06480.t1	2.90027e-18	0.9873
ItfNAC55	itf10g04230.t1	2.90027e-18	0.9873
ItfNAC55	itf06g18030.t1	3.06143e-14	0.969076
ItfNAC55	itf01g17370.t1	6.81213e-18	0.986218
ItfNAC55	itf00g12820.t1	2.90027e-18	0.9873
ItfNAC55	itf15g15960.t1	9.34127e-13	0.956959
ItfNAC55	itf05g24030.t1	3.46537e-17	0.983893
ItfNAC55	itf05g22160.t1	1.9498e-13	0.963019
ItfNAC55	itf11g20430.t3	2.55937e-14	0.969606
ItfNAC55	itf08g02820.t1	2.90027e-18	0.9873
ItfNAC55	itf04g23250.t1	2.90027e-18	0.9873
ItfNAC55	itf02g12010.t2	2.8943e-18	0.987302
ItfNAC55	itf05g24770.t1	2.23427e-18	0.987613
ItfNAC55	itf08g03070.t1	2.84677e-12	0.952041
ItfNAC55	itf13g01250.t1	2.90027e-18	0.9873
ItfNAC55	itf11g07150.t3	1.81352e-18	0.987858
ItfNAC55	itf03g27320.t1	2.90027e-18	0.9873
ItfNAC55	itf04g18380.t1	2.90027e-18	0.9873
ItfNAC55	itf02g23920.t1	3.38415e-12	0.951228
ItfNAC55	itf12g25310.t1	8.08506e-13	0.957558
ItfNAC55	itf01g28560.t1	3.42853e-14	0.968736
ItfNAC55	itf04g16110.t1	1.15153e-18	0.988375
ItfNAC55	itf11g01750.t1	2.90027e-18	0.9873
ItfNAC55	itf03g01660.t2	3.97503e-15	0.974599
ItfNAC55	itf04g29150.t4	6.92101e-17	0.982788
ItfNAC55	itf09g03960.t1	1.50192e-18	0.988075
ItfNAC55	itf05g21940.t1	9.39197e-17	0.982276
ItfNAC55	itf08g00560.t1	2.96045e-18	0.987275
ItfNAC55	itf06g15460.t3	2.8888e-18	0.987305
ItfNAC55	itf06g18370.t1	4.53084e-20	0.991468
ItfNAC55	itf05g17450.t1	2.90027e-18	0.9873
ItfNAC55	itf03g02460.t1	5.31919e-14	0.967382
ItfNAC55	itf12g14590.t1	2.90027e-18	0.9873
ItfNAC55	itf04g07650.t1	2.90027e-18	0.9873
ItfNAC55	itf03g09860.t1	2.90027e-18	0.9873
ItfNAC55	itf09g15440.t1	2.90027e-18	0.9873
ItfNAC55	itf05g12980.t1	2.90027e-18	0.9873
ItfNAC55	itf08g01650.t1	2.90027e-18	0.9873
ItfNAC55	itf13g13790.t1	2.53436e-12	0.95258
ItfNAC55	itf07g07060.t1	2.90027e-18	0.9873
ItfNAC55	itf14g18440.t1	2.76566e-16	0.980341
ItfNAC55	itf03g01660.t3	4.81094e-17	0.983378
ItfNAC55	itf14g04300.t1	2.63974e-16	0.980428
ItfNAC55	itf14g02540.t2	2.91555e-18	0.987294
ItfNAC55	itf05g19580.t2	3.41838e-18	0.987099
ItfNAC55	itf12g02760.t1	2.23622e-14	0.969999
ItfNAC55	itf12g04900.t1	1.99317e-18	0.987748
ItfNAC55	itf03g19790.t1	2.90027e-18	0.9873
ItfNAC55	itf12g27400.t4	1.69653e-14	0.970788
ItfNAC55	itf07g00640.t1	1.61903e-17	0.985026
ItfNAC55	itf13g21940.t3	1.88084e-17	0.984809
ItfNAC55	itf15g06570.t8	2.90027e-18	0.9873
ItfNAC55	itf13g14320.t1	1.35724e-18	0.98819
ItfNAC55	itf06g06430.t1	2.90027e-18	0.9873
ItfNAC55	itf12g27150.t1	3.51063e-16	0.979885
ItfNAC55	itf11g07000.t1	2.90027e-18	0.9873
ItfNAC55	itf15g06570.t16	2.82074e-18	0.987334
ItfNAC55	itf06g17710.t3	3.48396e-14	0.968688
ItfNAC55	itf00g55610.t1	4.91975e-13	0.959553
ItfNAC55	itf15g08850.t1	2.26605e-13	0.962478
ItfNAC55	itf00g30960.t3	5.99564e-14	0.967003
ItfNAC55	itf00g41340.t2	3.6286e-13	0.960728
ItfNAC55	ItfNAC116	2.55961e-18	0.987451
ItfNAC55	itf14g03210.t9	2.99403e-18	0.987261
ItfNAC55	itf15g05960.t1	1.08363e-12	0.956335
ItfNAC55	itf12g10000.t1	6.79161e-15	0.973254
ItfNAC55	itf09g04710.t1	7.31341e-14	0.966364
ItfNAC55	itf03g10980.t1	2.90027e-18	0.9873
ItfNAC55	itf02g14150.t2	5.27729e-15	0.973896
ItfNAC55	itf09g10950.t4	2.88502e-18	0.987306
ItfNAC55	itf08g03580.t3	2.90393e-18	0.987298
ItfNAC55	itf14g03210.t11	3.89366e-15	0.974649
ItfNAC55	itf09g01110.t2	1.22087e-14	0.9717
ItfNAC55	itf13g10280.t1	2.90027e-18	0.9873
ItfNAC55	itf00g33730.t1	1.42852e-18	0.988132
ItfNAC55	itf03g05140.t1	8.9815e-18	0.985848
ItfNAC55	itf08g00420.t1	1.48006e-12	0.954993
ItfNAC55	itf11g07870.t1	3.67317e-16	0.979797
ItfNAC55	itf13g15440.t1	2.90027e-18	0.9873
ItfNAC55	itf07g06350.t1	1.73787e-17	0.984924
ItfNAC55	itf06g26430.t1	7.73829e-13	0.957738
ItfNAC55	itf06g06350.t1	7.2692e-18	0.986132
ItfNAC55	itf13g20190.t1	7.64779e-16	0.978323
ItfNAC55	itf05g17460.t1	1.67068e-14	0.970831
ItfNAC55	itf00g18850.t1	2.22623e-16	0.980746
ItfNAC55	itf08g00350.t1	1.41839e-14	0.971288
ItfNAC55	itf07g15790.t1	2.90027e-18	0.9873
ItfNAC55	itf06g13100.t4	1.51274e-18	0.988067
ItfNAC55	itf12g12730.t1	2.74988e-14	0.969395
ItfNAC55	itf03g21140.t1	3.83307e-12	0.950633
ItfNAC55	itf09g23930.t1	9.27206e-16	0.977918
ItfNAC55	itf10g24850.t1	1.44194e-16	0.981532
ItfNAC55	itf15g08090.t1	7.8031e-18	0.986037
ItfNAC55	itf15g13150.t1	3.81328e-14	0.968414
ItfNAC55	itf14g15780.t2	6.61975e-18	0.986256
ItfNAC55	itf05g15660.t3	2.90012e-18	0.9873
ItfNAC55	itf05g22990.t1	2.90027e-18	0.9873
ItfNAC55	itf03g10100.t2	1.08203e-16	0.982034
ItfNAC55	itf10g15600.t1	2.32722e-14	0.969883
ItfNAC55	itf14g01970.t1	6.39686e-19	0.989011
ItfNAC55	itf02g15980.t4	2.99486e-18	0.987261
ItfNAC55	itf10g22570.t1	1.69071e-17	0.984964
ItfNAC55	itf11g13080.t1	2.46738e-17	0.984409
ItfNAC55	itf08g07590.t2	1.3222e-15	0.977151
ItfNAC55	itf05g15220.t1	4.24421e-15	0.974438
ItfNAC55	itf00g46060.t1	2.90027e-18	0.9873
ItfNAC55	itf07g06340.t1	2.23282e-14	0.970004
ItfNAC55	itf05g17490.t1	1.90064e-16	0.981036
ItfNAC55	itf05g18240.t1	3.82569e-13	0.960526
ItfNAC55	itf04g03640.t1	2.62236e-17	0.984318
ItfNAC55	itf09g09840.t1	1.74579e-13	0.963413
ItfNAC55	itf04g23760.t3	2.90499e-18	0.987298
ItfNAC55	itf14g00910.t1	2.90027e-18	0.9873
ItfNAC55	itf03g06010.t1	1.78899e-18	0.987874
ItfNAC55	itf06g23610.t1	7.85688e-15	0.972876
ItfNAC55	itf12g18830.t1	2.64717e-15	0.975573
ItfNAC55	itf15g08640.t7	1.8043e-15	0.976458
ItfNAC55	itf10g20250.t1	2.90027e-18	0.9873
ItfNAC55	itf13g22480.t1	4.00956e-15	0.974578
ItfNAC55	itf01g03100.t1	2.90027e-18	0.9873
ItfNAC55	itf03g02870.t2	2.95794e-18	0.987276
ItfNAC55	itf05g21800.t1	1.20804e-16	0.981843
ItfNAC55	itf01g17860.t1	2.90027e-18	0.9873
ItfNAC55	itf09g27120.t1	1.44552e-16	0.981528
ItfNAC55	itf12g27260.t1	2.93156e-13	0.961531
ItfNAC55	itf02g27270.t1	2.90027e-18	0.9873
ItfNAC55	itf02g08980.t1	6.63569e-18	0.986252
ItfNAC55	itf01g30670.t4	4.53727e-15	0.974273
ItfNAC55	itf11g11290.t1	2.90027e-18	0.9873
ItfNAC55	itf13g08270.t1	2.90027e-18	0.9873
ItfNAC55	itf13g02010.t1	1.98267e-12	0.953697
ItfNAC55	itf12g11240.t1	2.90027e-18	0.9873
ItfNAC55	itf05g07760.t1	2.90027e-18	0.9873
ItfNAC55	itf11g07860.t1	1.4549e-16	0.981516
ItfNAC55	itf07g21890.t1	2.90027e-18	0.9873
ItfNAC55	itf09g00480.t1	1.15731e-12	0.956055
ItfNAC55	itf04g05370.t2	2.54888e-14	0.969618
ItfNAC55	itf06g26420.t1	2.90027e-18	0.9873
ItfNAC55	itf07g07780.t1	2.86844e-13	0.961612
ItfNAC55	itf12g04910.t1	4.0263e-17	0.983659
ItfNAC55	itf09g00400.t1	3.76308e-13	0.960589
ItfNAC55	itf13g06910.t1	2.90027e-18	0.9873
ItfNAC55	itf03g26660.t1	1.54907e-18	0.98804
ItfNAC55	itf12g18840.t1	3.87671e-12	0.950579
ItfNAC55	itf00g67090.t1	2.90027e-18	0.9873
ItfNAC55	itf11g07800.t2	2.90058e-18	0.9873
ItfNAC55	itf02g04970.t1	2.90027e-18	0.9873
ItfNAC55	itf09g03130.t1	2.90027e-18	0.9873
ItfNAC55	itf11g00420.t3	6.59055e-18	0.986261
ItfNAC55	itf03g28960.t5	6.08711e-16	0.978793
ItfNAC55	itf02g14260.t1	3.07369e-14	0.969064
ItfNAC55	itf15g08830.t1	5.14611e-13	0.959376
ItfNAC55	itf11g00260.t1	2.6338e-13	0.961928
ItfNAC55	itf02g14460.t1	3.30064e-16	0.980004
ItfNAC55	itf04g12710.t3	3.04886e-18	0.987239
ItfNAC55	itf02g10970.t1	3.88261e-16	0.979689
ItfNAC55	itf05g27260.t1	2.05049e-19	0.990144
ItfNAC55	itf10g10900.t1	2.90027e-18	0.9873
ItfNAC55	itf06g06870.t1	1.24196e-15	0.977288
ItfNAC55	itf07g07130.t1	2.90027e-18	0.9873
ItfNAC55	itf15g06570.t11	3.79383e-14	0.968429
ItfNAC55	itf04g15300.t2	1.2108e-12	0.955862
ItfNAC55	itf13g09030.t1	2.90027e-18	0.9873
ItfNAC55	itf03g28960.t2	4.19976e-16	0.979536
ItfNAC55	itf11g02970.t1	7.95556e-14	0.966089
ItfNAC55	itf11g13060.t1	2.90027e-18	0.9873
ItfNAC55	itf05g21790.t1	1.27884e-16	0.981744
ItfNAC55	itf05g26480.t1	2.90027e-18	0.9873
ItfNAC55	itf14g11170.t1	2.90027e-18	0.9873
ItfNAC55	itf06g23070.t1	1.20151e-12	0.955895
ItfNAC55	itf12g02900.t1	3.96179e-19	0.989503
ItfNAC55	itf11g11300.t1	2.76023e-18	0.98736
ItfNAC55	itf10g20010.t1	8.95039e-16	0.977992

## Sheet: Sheet4
Supplementary file 4: FPKM value of ItbNACs in different tissues
Gene name	flower	flowerbud	leaf	root1	root2	stem
ItbNAC42	4.99e-07	1.63e-06	9.05e-05	0.749675	0.723347	1.0577
ItbNAC47	0.0408622	2.34007	38.4039	25.2159	17.9896	9.17596
ItbNAC41	0	0	0	0	0	0
ItbNAC96	3.88011	1.68007	3.19124	21.5522	31.8917	4.05916
ItbNAC105	0	0	0	1.24756	1.19885	0
ItbNAC23	0.0712187	0.165618	2.48478	1.0555	0.95587	3.5583
ItbNAC5	12.8418	15.5959	19.6219	27.2374	29.4558	21.0751
ItbNAC4	1.32407	3.15171	4.88909	4.03845	3.8639	4.82165
ItbNAC11	0	0	0	0.413878	0.275689	0
ItbNAC30	0	0	0	0	0	0
ItbNAC72	0	0	0	0.276642	0	0
ItbNAC1	0	0.442193	1.15849	0.625996	0.225094	0
ItbNAC87	0	0	0.11289	0.278666	0.598314	0
ItbNAC44	543.626	4.30319	1.06626	0.291001	0.860554	1.54678
ItbNAC128	0	0	0	0	0	0
ItbNAC16	0.947914	0.000828265	1.48e-05	7.31e-06	5.01e-05	7.55e-05
ItbNAC76	0.359943	0.753207	1.85215	7.85532	5.99024	3.72214
ItbNAC89	0	0.114923	1.35401	1.16555	1.32273	2.10315
ItbNAC25	2.4895	3.3013	83.7095	506.652	355.426	61.7336
ItbNAC51	0.467979	9.67867	6.30679	2.96067	3.18954	18.2828
ItbNAC93	0	0.477418	0.133645	2.01896	1.97396	5.68912
ItbNAC66	0	0	0	0	0	0
ItbNAC46	45.014	32.7545	84.6485	155.21	145.983	83.7938
ItbNAC97	0	0	0	9.49619	14.972	0
ItbNAC38	0.0550737	0.153589	0.928236	0.681953	1.26728	0.639998
ItbNAC20	1.18969	1.05697	8.61116	184.75	220.093	2.48996
ItbNAC48	0.916074	4.27363	9.93915	35.9179	27.4671	11.3287
ItbNAC109	0	0.85555	0	0	0	0
ItbNAC50	1099.05	71.9705	0.619558	1.3158	1.99207	1.20385
ItbNAC132	0.0684906	1.09156	9.09379	1.34216	0.863827	0.72951
ItbNAC116	0	0	0	0	0	0
ItbNAC52	0	0.400619	6.62022	0.0732817	0	0.555823
ItbNAC63	0.0632302	0.603938	29.5704	1.69711	0.829735	10.5983
ItbNAC103	3.74427	16.3674	16.3725	20.6128	29.2709	21.4382
ItbNAC74	14.7747	4.53503	8.66199	4.3556	5.96633	3.56288
ItbNAC13	0.733113	0.17253	0.75003	0	0	0.279702
ItbNAC69	8.54079	9.56069	0.746555	1.5151	0.608721	6.84958
ItbNAC112	1.72532	10.2141	3.62986	2.28024	2.51582	6.44177
ItbNAC106	0.00248394	4.74995	10.3325	7.10315	11.479	11.7187
ItbNAC111	0.00171737	0.00280058	0.143075	0.00112882	0.001381	0.642207
ItbNAC56	31.4059	5.7331	2.13816	5.88021	6.54333	0.517194
ItbNAC54	44.9168	33.7178	202.418	48.138	47.6199	49.8062
ItbNAC6	0.658371	9.80825	45.0654	144.096	116.46	73.7505
ItbNAC117	91.7844	5.20329	10.5062	13.0388	14.2711	5.32376
ItbNAC65	0	0	0	0	0.0855332	0
ItbNAC92	0	0	0	0	0	0
ItbNAC14	703.428	28.3506	18.7788	4.59492	5.76223	10.7798
ItbNAC85	0	0	0	0	0	0
ItbNAC45	0	0	0	0	0	0
ItbNAC120	0	0	0	0	0	0
ItbNAC121	0	0	0	0	0	0
ItbNAC12	0.110976	0.0969198	0	0.43087	1.12101	0
ItbNAC104	0.272752	1.52664	2.12259	1.09851	1.04543	3.90491
ItbNAC79	0.464072	0.3047	3.26332	54.5797	42.0959	15.9612
ItbNAC113	78.2137	17.1509	338.361	273.193	333.035	115.472
ItbNAC21	0	0.636024	0.975507	0.208924	0	2.08509
ItbNAC94	21.2661	6.17264	12.5569	4.96094	3.99506	7.52375
ItbNAC39	20.8323	19.1581	15.7813	30.4566	25.1972	29.8964
ItbNAC84	0.0671925	0.0572779	3.90502	16.9506	17.3763	1.08983
ItbNAC29	0	0.23458	2.17313	47.3387	57.8154	0.376162
ItbNAC119	0	0.150763	0	0	0.122937	0.185051
ItbNAC36	0.5563	0.127925	1.55046	0.108422	0	0.171507
ItbNAC49	0.0951247	0.200718	1.27668	0.263857	0.0740826	1.63229
ItbNAC123	0	0	0	0	0	0
ItbNAC82	0	0	0	0	0	0
ItbNAC122	0	0	0	0	0	0
ItbNAC37	1.13803	0.717468	27.0797	1.49321	1.47913	3.34839
ItbNAC34	488.194	42.7423	10.6183	28.7028	55.2422	9.26161
ItbNAC90	0	0	0	0	0	0
ItbNAC68	0	0	0	0	0.220549	0.445251
ItbNAC75	0.140232	0	0	0	0	0
ItbNAC81	21.7364	2.80985	1.18796	1.04448	1.40718	0.906755
ItbNAC101	0.979578	5.15043	3.38486	0.118031	0.761755	5.30819
ItbNAC125	0	0	0	0.85276	0.215804	0.268971
ItbNAC124	0	0	0	0	0	0
ItbNAC2	10.3755	26.5611	1.34524	5.68998	3.42482	0.359726
ItbNAC15	6.3e-05	0.515341	0.035762	0.000241114	5.51e-06	0
ItbNAC114	20.0838	4.77273	5.27319	25.3217	35.7682	7.19027
ItbNAC61	1.74e-21	0.435291	6.35e-10	1.07e-41	9.85e-05	8.3e-05
ItbNAC55	0.182863	0.123355	0.504166	8.64799	6.09711	1.25543
ItbNAC9	0.149285	0.169045	0.269639	1.26139	3.53645	0.103017
ItbNAC22	7.58238	3.74402	22.2456	34.2013	33.8423	10.9959
ItbNAC67	0	0	0	0	0	0
ItbNAC43	9.23397	8.14984	11.6667	24.7785	24.5971	12.5342
ItbNAC115	0.297285	1.4895	1.71171	0.100947	0.0682612	1.2872
ItbNAC3	1840.3	18.148	3.39523	33.3311	21.4981	10.4776
ItbNAC32	0.504594	2.12635	2.15039	3.26385	3.78387	3.7978
ItbNAC8	104.783	65.8753	29.7364	67.4244	54.1967	22.2931
ItbNAC86	0.163858	1.63475	2.05197	2.40505	1.56518	40.9406
ItbNAC78	0	0	0	0	0	0
ItbNAC59	0	0	0	0.416313	0.456197	0
ItbNAC102	0	0	0	0	0	0
ItbNAC40	0	0	0	0	0	0
ItbNAC73	0.0411341	1.42063	1.31041	5.88882	6.93611	2.81
ItbNAC27	0	0.317197	0.87951	0.462367	0.567161	0.556029
ItbNAC10	0.159536	4.81861	6.64156	1.27391	1.86049	9.22071
ItbNAC100	0	0.109537	2.74082	0.465076	0.55355	5.22725
ItbNAC131	0	0	0	0	0	0
ItbNAC31	0	0	0	0	0	0
ItbNAC18	0.136207	0.642079	0.273466	0.968602	1.65212	0.217773
ItbNAC26	0.693766	2.46969	4.75649	0.253156	0.63827	6.92038
ItbNAC24	0.000223991	0.507121	0.375059	0.287263	4.01e-05	0.908272
ItbNAC126	0	0	0	0	0	0
ItbNAC107	0	0.767346	0.816387	0.812901	0	0.993077
ItbNAC35	0.0884178	0.369359	1.33321	0.802102	0.384359	1.26931
ItbNAC91	0	0	0	0	0	0
ItbNAC64	0	1.24832	1.20695	0.325499	0.226323	3.57531
ItbNAC7	184.849	20.2564	28.1044	32.8993	29.5903	13.9086
ItbNAC129	0	0	0	0.37096	0.362348	0
ItbNAC53	0	0.452077	0.282623	0	0	0.216834
ItbNAC88	2.02018	2.0035	1.59622	30.4318	37.9962	1.35827
ItbNAC83	6.57477	3.30019	1.46767	72.5015	56.3435	2.69072
ItbNAC70	0	0	0	0	0	0
ItbNAC95	5.21816	29.4767	0	0	0	0
ItbNAC28	19.8736	5.03031	0.821866	11.5094	10.4067	2.17389
ItbNAC99	62.785	20.7161	26.5407	25.5802	17.8651	34.3538
ItbNAC17	0.485798	0.57484	0.835669	2.37799	2.10263	0.238759
ItbNAC62	23.0117	1.27916	0.194313	1.58713	1.08427	0.350888
ItbNAC127	0.966683	0.290594	1.16621	2.10467	1.83501	3.43808
ItbNAC110	580.867	0.96347	0.468753	0.379032	0.517751	0.744586
ItbNAC80	14.9039	8.07012	0.718209	2.68e-05	8.36e-06	0.970981
ItbNAC57	0	0	0	0	0	0
ItbNAC118	0.453228	10.5337	22.32	24.6898	24.3032	36.6258
ItbNAC60	1.54371	2.60357	8.0965	0.526964	0.7862	2.07749
ItbNAC108	0	0.245331	0	0	0	0.148695
ItbNAC33	0	0	0	0	0	0
ItbNAC58	0	0	0	0	0	0
ItbNAC130	0	0	0	0	0	0
ItbNAC71	114.365	3.07913	1.61566	0.432875	0.0810251	1.22354
ItbNAC77	0	0.217729	0.19461	0.391707	0.428604	0

## Sheet: Sheet5
Supplementary file 5: FPKM value of ItfNACs in different tissues
Gene name	callus_flower	callus_stem	flower	flowerbud	leaf	root1	root2	stem
ItfNAC41	2.24447	0.569547	0	7.74e-05	2.24885	5.32415	14.3479	0.922627
ItfNAC146	8.32863	1.41601	0.156283	0.383436	0.92183	0.521346	0.0731468	3.47541
ItfNAC83	0	0	0	0	0	0	0	0
ItfNAC136	1.31591	0.176986	0.0431538	1.61722	1.34698	0	0	2.33188
ItfNAC23	25.4599	18.1619	0.516468	0.0965541	5.0096	4.58181	7.33338	0.400913
ItfNAC36	3.28618	1.37424	1.25724	1.33312	0.872465	1.07071	0.809618	1.5458
ItfNAC56	0	0	0	0	0	0	0	0
ItfNAC46	12.103	7.50495	29.7164	10.1308	9.61034	8.96597	18.8601	18.4103
ItfNAC100	0	0	0	0	0	0	0	0
ItfNAC15	364.971	230.849	197.435	5.12721	4.37021	19.1894	70.9836	10.0205
ItfNAC123	0	0	0	0	0	0	0	0
ItfNAC1	0	0	0	0	0	0	0	0
ItfNAC133	1.46298	0.618952	1.74605	6.55457	6.20264	0.00360377	0.673189	4.06247
ItfNAC42	0	0	0	0	0	0	0	0
ItfNAC28	36.0902	43.4975	50.3127	12.3414	138.205	11.6727	21.5603	43.2452
ItfNAC142	0	0	0	0	0	0	0	0
ItfNAC117	7.42068	2.23341	1.21244	2.02676	1.80424	15.4437	3.46588	6.4042
ItfNAC88	2.2131	0.991487	0.98895	0.687263	0.930227	4.2063	1.18706	0.803695
ItfNAC67	25.1115	14.2127	0.325064	0.0654683	1.96063	4.19455	5.49853	0.346196
ItfNAC120	140.543	69.1139	72.7265	28.8193	22.7921	28.8688	32.5789	51.326
ItfNAC92	23.1951	3.25352	0.1484	1.2546	7.6405	1.01512	3.59096	4.17747
ItfNAC58	20.3588	25.4679	30.2909	11.6603	49.9296	200.489	268.386	116.997
ItfNAC54	22.1931	25.8008	15.0994	5.29911	14.8757	19.0062	26.8027	15.6271
ItfNAC144	0	0	0	0	0	0	0	0
ItfNAC106	52.9601	31.0296	1.96382	1.31974	3.99706	29.6415	110.345	3.8934
ItfNAC5	0	0	0	0	0.146062	0.726723	2.79221	0.367425
ItfNAC4	0	0	0	0	0	0	0	0
ItfNAC127	0.748008	5.29352	0	0	0.560381	2.24747	0.166287	0
ItfNAC101	1.9707	2.62806	0	0	1.16041	0	0	2.38331
ItfNAC70	0	0	0	0	0	0	0	0
ItfNAC111	7.93542	5.92235	0.0993283	0.149565	0.228361	2.06491	0.359124	1.4578
ItfNAC3	1.58037	0.115723	0	0.754178	0.520894	0	1.25843	2.40203
ItfNAC38	0	0	0	0	0.132627	0	0	0
ItfNAC108	2.18365	14.4844	0.371062	2.08783	5.52699	3.06592	1.33703	10.4152
ItfNAC50	0	0	0	0	0	0	0	0
ItfNAC119	2.26084	0	0	0	0	0.922767	7.31762	2.16238
ItfNAC72	6.35489	10.3489	2.24213	6.72281	6.11931	12.4739	4.58839	4.40734
ItfNAC141	0.284065	0.106234	0	0	0	0	0	0.147222
ItfNAC105	0	0	0	0	0	0	0	0
ItfNAC2	0	0	0	0	0	0	0	0
ItfNAC52	0	0	0	0	0	0	0	0
ItfNAC26	0	0	0	0	0	0	0	0.994686
ItfNAC78	0	0	0.0863359	0	0	0	0	0
ItfNAC8	0	0	0	0	0	0	0	0
ItfNAC107	0	0	0.469772	0.151005	1.11681	12.9756	45.0464	0.577691
ItfNAC131	0	0	0	0	0	0	0	0
ItfNAC91	0.739289	0.153661	0	0	0	0.0860916	0	0
ItfNAC61	0.189834	0.0880309	0.107493	3.40555	0.934109	0.0422142	0.123563	2.27606
ItfNAC94	0	0.237051	0	0	0	0	0	0
ItfNAC151	0	0.0757527	0.726631	1.01808	8.8063	2.51611	0.910406	1.48975
ItfNAC33	11.053	13.6535	51.09	2.90331	52.0625	39.8191	48.4204	16.0734
ItfNAC110	0.0565564	0	0.19417	0.173326	0.832642	3.33625	4.81801	0
ItfNAC31	7.74036	1.75753	0.0565267	0	12.4992	1.53913	14.9643	2.53415
ItfNAC21	19.9729	17.4036	42.4184	21.917	36.6816	28.9721	32.2436	49.4543
ItfNAC39	4.47336	1.83024	0.188862	0.346033	0.641607	0	1.02617	1.15722
ItfNAC19	0.168403	0.115254	0.409086	0.622813	0.525098	3.45728	7.91746	0.924943
ItfNAC68	8.47409	8.99688	56.7198	6.22937	4.58335	2.86433	5.64493	1.60391
ItfNAC24	1.22311	0.0673169	0.353722	5.56586	2.683	0.408903	0.199555	7.98393
ItfNAC82	0	0	0	0	0	0	0	0
ItfNAC90	3.8537	2.52694	34.1238	2.52552	0.442757	1.54139	7.66616	1.09143
ItfNAC66	93.5843	97.1818	28.3257	7.83286	193.898	20.4448	28.4534	44.1454
ItfNAC71	1.55867	0.604581	6.61575	3.13401	18.4992	1.1308	1.22747	5.46524
ItfNAC75	2.91e-06	0.0893914	0	1.95436	0.242997	0.0925514	0	0.261743
ItfNAC137	0	0	0	0	0	0	0	0
ItfNAC112	0	0	0	0	0	0	0	0
ItfNAC17	42.6404	45.4201	26.2681	16.3888	38.1137	72.862	65.1388	50.0101
ItfNAC143	0	0	0	0	0	0	0	0
ItfNAC97	0	0	0	0	0	0	0	0
ItfNAC40	20.5631	0.666636	0.768257	1.93894	0.892098	0.639332	3.8396	2.49642
ItfNAC32	0.411433	0.12566	0.0778122	3.20846	0.687306	0	0	2.06092
ItfNAC48	246.722	62.2834	91.9588	43.3474	29.338	31.1366	21.4154	17.1537
ItfNAC73	56.1606	5.59158	7.25163	8.14861	0.30376	1.04797	1.97594	1.14888
ItfNAC128	0	0	0	0	0	0	0	0
ItfNAC102	1.62273	3.15196	0.411372	0.462917	23.3007	310.984	153.274	20.0517
ItfNAC57	0	0	0	0	0	0	0	0
ItfNAC80	0	0	0	0	0	0	0	0
ItfNAC130	24.1592	3.02725	59.0841	2.1501	1.53204	0.766392	4.19938	0.285394
ItfNAC149	0	0	0	0	0	0	0	0
ItfNAC135	19.0676	19.4669	11.3803	4.20376	5.74305	22.5303	17.0687	10.5098
ItfNAC16	0.499103	1.14451	2.17715	0.315916	1.16614	0.481807	1.74744	1.33263
ItfNAC98	0	0	0	0	0	0	0	0
ItfNAC87	0	0	0	0	0.0789217	0	0	0.0927134
ItfNAC25	0	0	0	0	0	0.1615	1.03709	0.366202
ItfNAC93	19.7538	27.358	10.5616	3.519	12.7158	16.8935	16.5631	6.28699
ItfNAC64	0	0	0	0.138734	4.94757	0	0	0.446137
ItfNAC96	0	0	0	0	0	0	0	0
ItfNAC62	55.0946	12.0219	405.37	68.408	1.86023	0.479292	22.3	1.74707
ItfNAC69	0	0	0	0	0	0	0	0
ItfNAC86	0	0	0	0	0	0	0	0
ItfNAC59	7.04778	2.80585	0.411119	0.667467	46.5738	106.845	82.1693	16.3021
ItfNAC27	0	0	0	0	0	0	0	0
ItfNAC53	2.52e-07	1.61e-06	0.0341168	0.209871	0.329005	0.684016	1.39603	3.23816
ItfNAC76	4.13005	0	0	0	0	0	0	0
ItfNAC13	0	0.0528786	0.122891	0	0.258784	0.285513	0	0.0697429
ItfNAC51	0	0	0	0	0	0	0	0
ItfNAC30	2.28031	5.03421	0.493353	0.0978544	0.673618	1.80503	0.393666	0.323451
ItfNAC132	1.95721	0.223452	0	2.34459	0.416411	0.0668017	0	3.94638
ItfNAC9	80.2005	96.4213	24.7803	5.81319	114.264	10.0343	21.0212	28.1476
ItfNAC89	0	0	0	0	0	0.486696	0	0
ItfNAC116	0	0	11.4003	1.16778	0.0544643	0	0	0
ItfNAC79	0	0	0	0	0	0	0	0
ItfNAC37	44.3646	42.5715	0.675042	0.914948	83.6985	30.7282	109.566	81.903
ItfNAC139	46.921	40.8616	19.8918	7.61699	88.4099	28.8905	14.4064	6.67344
ItfNAC103	4.6909	0.454051	11.6616	21.9625	0.379695	0.164613	0.324017	3.17815
ItfNAC124	0.292268	6e-12	0	0.0749105	0.132277	0	0	1.8283
ItfNAC145	0	0	0	0	0	0	0	0
ItfNAC122	1.18786	0.375459	6.22022	1.77763	2.01874	1.65875	0.416761	2.58039
ItfNAC22	48.6469	40.1254	84.8986	56.0907	85.1445	51.4292	70.369	44.4433
ItfNAC43	0	0	0	0	0	0	0	0
ItfNAC125	1.71312	2.1877	29.7795	5.64153	12.8103	45.009	129.826	17.3488
ItfNAC147	0	0	0	0	0.195912	0	0	0
ItfNAC118	0.71168	0	0	0	0	5.29851	11.2461	1.00351
ItfNAC34	2.49192	0.177431	0	0.000149725	1.43982	0	0.000171174	6.28466
ItfNAC14	39.889	13.2983	71.0532	72.574	2.99925	7.2052	2.895	0.045102
ItfNAC65	0	0	0	0.316959	0.734207	0.601173	0.762891	0.16351
ItfNAC84	0	0	0	0	0	0	0	0
ItfNAC74	4.02249	2.48905	2.30576	0.115398	28.1832	1.35259	8.75597	10.8438
ItfNAC148	0	0.14897	0	0	1.35057	0.653277	1.03638	0.084785
ItfNAC63	0.930906	2.57811	0	0	0.421757	0.794867	2.07899	0
ItfNAC20	40.176	44.3284	56.6397	1.946	0.514594	3.26749	17.5877	0.437613
ItfNAC95	0	0	0.131011	0.458483	0.7051	0.958559	4.25125	6.97227
ItfNAC104	1.45598	0.000133	0.398677	0.259048	0.448367	0.000757135	0.308087	1.02544
ItfNAC49	10.335	3.74439	0	0.411898	0.181844	0.382391	0.338763	1.77166
ItfNAC140	16.6411	12.3262	2.45298	9.31822	18.1177	26.5719	32.5176	23.9262
ItfNAC85	0	0	0	0	0	0	0	0
ItfNAC121	0	0.0861612	0	0	0.922773	0.198184	0.17514	0.966212
ItfNAC29	45.0769	7.81832	3.05436	17.0016	1.54172	3.9238	11.1804	0.0486273
ItfNAC77	0	0	0	0	0	0	0	0
ItfNAC55	8.36683	20.2868	184.451	15.1547	5.36479	0.229298	1.54265	2.72276
ItfNAC109	87.0315	0.309884	0	0.0983548	0.0573193	0.290417	0.281413	0.0707322
ItfNAC129	0	0	0	0	0	0	0	0
ItfNAC113	0	0	0	0	0	0	0	0
ItfNAC47	0.238353	0.273216	0.458095	2.60644	2.67648	0.415893	0.2413	3.56668
ItfNAC18	10.3841	18.2165	0.259448	1.8461	25.9596	93.5304	26.5114	22.406
ItfNAC99	0	0	0	0	0	0	0	0
ItfNAC114	0	0.257141	0	0	0.424894	0	0	11.9897
ItfNAC44	4.11973	4.96222	1.7082	2.84937	3.40008	3.91374	2.68557	3.53486
ItfNAC134	182.075	52.8219	38.672	2.10962	610.117	182.664	600.597	348.86
ItfNAC150	0	0	0	0	0	0	0	0
ItfNAC60	11.1339	15.5891	2.32215	1.01822	2.563	18.8133	18.1794	5.85478
ItfNAC81	0	0	0	0	0	0	0	0
ItfNAC6	0	0	0	0.177008	0.173759	0.949545	6.19208	0.746516
ItfNAC126	0.739454	1.52244	0.2516	0.911537	0	0.139252	0.135184	0
ItfNAC115	17.4191	11.9002	10.9328	4.49679	12.8617	9.21515	4.66664	6.13723

## Sheet: Sheet6
Supplementary file 6: FPKM value of ItbNACs under various stress
Gene name	ITB_ABAT	ITB_BABA	ITB_BAPT	ITB_BICO	ITB_BTHT	ITB_COCO	ITB_COLD	ITB_DSCO	ITB_GA3T	ITB_HEAT	ITB_HECO	ITB_HOCO	ITB_IAAT	ITB_MANN	ITB_NACL
ItbNAC42	0.000247149	0.0345816	0.97622	0.000264121	0.000231538	0.866929	0.00230314	1.62e-06	0.724441	0.00028576	0.640909	0.921804	3.78e-19	0.00011177	0.72161
ItbNAC47	3.14628	20.8047	3.19226	0.124952	3.28156	1.06551	141.546	1.07495	48.2923	0.415178	0.77456	2.86748	1.97599	0.706786	20.4827
ItbNAC41	0	0	0	0	0	0	0	0	0	0	0	0	0	0	0
ItbNAC96	141.182	3.41294	8.85091	7.86152	23.9749	9.90752	13.0604	4.90238	17.0805	9.61976	4.84514	11.7575	9.52771	23.1147	3.77141
ItbNAC105	0	0	0	0.112932	0.104799	0.0927732	0	0	0	0	0.0988267	0	0	0.0999715	0
ItbNAC23	1.02024	1.71356	1.98406	0.520609	0.000405271	0.000402669	0.757506	2.74756	1.98754	0.433949	0.874249	9.59e-05	0.912741	1.69875	3.49746
ItbNAC5	24.9725	54.1317	20.4924	20.9195	31.8241	16.1522	72.0763	16.6229	22.7713	18.4606	17.6257	20.4538	18.8168	29.3744	19.8856
ItbNAC4	7.3933	13.3157	7.03298	3.91703	7.81203	5.01392	30.0537	5.5989	6.85129	6.14097	4.78695	7.7709	7.71968	6.91775	4.69911
ItbNAC11	0	0	0	0	0	0	0	0	0	0	0	0	0	0	0
ItbNAC30	0	0	0	0	0	0.302094	0	0	0	0.409683	0	0	0	0	0
ItbNAC72	0	0	0	0	0	0	0	0	0	0	0	0	0	0	0
ItbNAC1	0.0724499	0	0.0700453	0	0	0.557661	0.1505	0.414449	0	0.173717	0.322438	0.0702689	0	0.404255	0
ItbNAC87	0	0	0.0718793	0	0	0	0	0	0	0	0	0	0	0	0
ItbNAC44	24.4825	14.6099	3.25059	3.05595	5.97484	2.12189	4.73071	0.635061	8.46339	1.35528	1.08065	2.986	2.52794	4.61984	3.67599
ItbNAC128	0	0	0.124095	0	0	0	0	0	0	0	0	0	0	0	0
ItbNAC16	0.000361086	0.000140186	0.000164993	0.00444997	0.00112168	0.000273713	0.000396178	0.000452046	0.000250236	2.00839	0.000599454	0.000110312	0.000134232	0.00130846	2.77246
ItbNAC76	2.17418	0.313382	1.52225	0.280107	0.350618	1.11952	1.39996	2.94806	3.19776	1.05312	1.61563	1.95772	1.27649	1.07352	5.11627
ItbNAC89	0.401584	0	0.617937	0	0.104372	0.592178	0	0.362936	0.206839	0.365224	0.21156	0	0.108323	0.427649	0.26418
ItbNAC25	82.876	366.766	28.9117	35.2696	48.1975	7.65974	277.973	15.9968	34.4583	11.2761	6.44368	28.9065	16.3536	27.6613	29.4158
ItbNAC51	6.97789	3.20718	6.46252	3.00474	4.7786	5.41365	1.95902	7.44625	5.44432	6.08594	5.31289	7.11572	4.65073	6.08341	7.40594
ItbNAC93	0.860815	0	1.77955	0.0794636	0	0.630765	0.710987	3.43235	4.45441	0.330079	2.17056	2.92645	1.92748	1.51288	5.48591
ItbNAC66	0	0	0	0	0	0	0	0	0	0	0	0	0	0	0
ItbNAC46	56.7025	97.8923	41.6901	25.8453	49.5931	30.7549	183.719	28.7006	49.2576	24.3599	27.4305	36.2529	36.2267	41.5193	41.2679
ItbNAC97	0	0	0	0	0	0	0	0	0	0	0	0	0	0	0
ItbNAC38	0.163047	1.1499	0.686782	0.828554	0.743237	0.611711	0.173969	1.30137	0.598291	0.688943	1.23339	0.797586	0.304968	1.69557	1.07703
ItbNAC20	23.3104	0.88947	1.36902	0	0	1.61537	5.06369	0.846687	0.794837	1.68503	1.47263	0.957672	1.58022	0.675026	2.63971
ItbNAC48	21.4214	21.3441	23.2255	8.97921	22.248	15.4391	69.354	18.2105	34.2313	25.8861	13.5517	19.6668	16.4103	21.4849	20.6363
ItbNAC109	0	1.01344	0	0	0	0	0	0	0	0	0	1.11048	0	0	0
ItbNAC50	57.6776	90.8511	0.997961	12.6157	19.2355	0.722247	10.6963	0.613825	0.684488	1.71533	0.395881	10.2117	0.930379	35.0985	33.4518
ItbNAC132	1.315	4.68756	3.9452	5.65695	6.5095	4.73373	2.78026	4.58079	4.50391	2.88192	3.05175	3.33846	4.53296	2.56151	1.95658
ItbNAC116	0	0	0	0	0	0	0	0	0	0	0	0	0	0	0
ItbNAC52	0.609493	5.5521	4.65443	3.65007	1.95098	4.69815	2.2166	4.24254	5.0576	3.92821	3.4083	4.88722	6.20878	2.24166	1.09301
ItbNAC63	9.84558	67.715	7.78302	51.8546	238.45	7.24208	94.8001	13.7621	18.9063	9.70128	2.33155	14.6728	11.6272	14.5983	7.92323
ItbNAC103	8.66629	4.83479	9.91459	5.29416	6.72783	8.32817	11.3105	9.87296	8.12178	6.43532	9.29376	9.59196	8.52724	9.24435	10.2528
ItbNAC74	7.96451	12.9334	8.37659	12.9638	20.3055	5.5447	10.584	4.90822	8.14238	5.81562	5.4068	7.13149	5.9606	8.45224	14.8207
ItbNAC13	0.381016	0	0.476956	0	0	0.56014	0	0.436888	0.597806	0.522743	0.383086	0.408784	0.0648114	0.206837	0.345983
ItbNAC69	7.37415	1.39029	2.19108	6.60944	16.5722	2.08122	0.970548	2.70733	4.12217	2.88428	3.05791	1.34645	1.64205	12.0598	7.45943
ItbNAC112	6.82134	3.74187	7.54515	3.05464	7.26033	4.8576	11.9719	3.70996	8.26981	5.85193	4.31229	6.95383	5.81218	3.47786	14.6285
ItbNAC106	7.47861	7.79057	7.68167	4.97225	5.60889	6.21628	1.39206	7.49663	9.11569	11.5988	7.20389	6.38417	5.60773	9.83692	7.32059
ItbNAC111	0.000149806	0.119893	0.000154753	0	0.0505913	1.38e-05	0.115917	0.000430617	2.53e-05	0.141307	0.000108986	0.0524323	0.170014	0.000158906	1.68e-05
ItbNAC56	53.1868	7.80549	16.0273	13.7207	19.8735	6.45482	8.66236	6.14117	9.33342	4.24281	1.39047	28.6665	16.4407	23.0248	27.581
ItbNAC54	270.025	788.034	300.103	326.25	390.68	227.491	898.649	198.355	458.8	185.003	139.833	291.238	310.372	220.439	265.233
ItbNAC6	39.8273	38.0557	35.4079	45.1876	50.0706	29.4351	31.5028	32.5478	32.3807	32.5433	26.9191	37.0865	35.9793	29.5993	29.6206
ItbNAC117	72.5858	50.9268	135.657	27.3685	42.2104	81.6836	36.2828	79.2953	67.5526	76.3459	68.0119	109.808	136.708	88.0118	72.5729
ItbNAC65	0	0	0	0	0	0	0.192789	0	0.0798044	0.102869	0	0.33498	0	0	0
ItbNAC92	0	0	0	0	0	0	0	0	0	0	0	0	0	0	0
ItbNAC14	359.314	142.813	103.634	171.761	222.651	71.8261	127.624	71.5739	178.21	36.9806	35.0388	223.071	142.308	171.19	135.271
ItbNAC85	0	0	0	0	0	0	0	0	0	0	0	0	0	0	0
ItbNAC45	0	0	0	0	0	0	0	0	0	0	0	0	0	0	0
ItbNAC120	0	0	0	0	0	0	0	0	0	0	0	0	0	0	0
ItbNAC121	0	0	0	0	0	0	0	0	0	0	0	0	0	0	0
ItbNAC12	0.677377	0.114107	0	0	0.126315	0.109388	1.78008	0.104109	0.112517	0	0.114245	0.124534	0	0.124489	0
ItbNAC104	21.9432	1.99945	11.059	0.567428	1.56593	14.5892	20.2747	11.3694	17.3058	13.5132	13.9602	13.0453	12.5831	8.5551	7.97071
ItbNAC79	7.73592	42.072	2.19003	21.4791	62.1163	2.55534	20.5127	3.81079	1.7703	0.814372	2.18579	4.70914	4.22625	10.922	5.36768
ItbNAC113	176.937	520.693	46.3666	83.4928	220.711	21.8288	438.484	32.024	220.024	15.6528	12.1999	62.1518	51.0228	64.7605	131.202
ItbNAC21	1.06594	0.405762	0.696037	0.210908	0.130559	0.930447	1.72002	0.94046	0.749868	0.0829903	0.720095	0.19325	0.305806	1.14263	0.956117
ItbNAC94	14.8738	14.3138	10.865	12.6911	16.957	8.70204	7.80267	9.29156	9.35486	11.3525	9.09645	11.944	10.7306	16.1614	14.8397
ItbNAC39	21.7202	16.0147	10.7527	15.0196	20.7049	10.9708	7.64307	14.7111	12.0124	15.4443	15.6108	7.80059	8.24868	17.9418	14.8841
ItbNAC84	0.603658	3.81316	2.07763	3.14366	1.9729	2.69791	5.3812	4.98182	1.24482	2.67668	2.43843	2.75952	3.60554	3.79033	2.57862
ItbNAC29	1.19181	2.10562	0.157089	1.25437	3.08659	0.214382	20.8177	0.774604	0.226465	0.204814	0.819127	0.624383	0.149836	0.731707	0.808129
ItbNAC119	0.39534	0	0	0	0	0	0	0	0	0	0	0	0	0.0905433	0
ItbNAC36	0.14074	0	0.1309	0.146752	0.0643885	0.234878	0.0734628	0.218767	0.187889	0	0.0609411	0.197001	0.125984	0.259246	0.238037
ItbNAC49	0.912436	0.185528	0.729484	0.0660556	0.150017	0.576508	0.392146	0.624217	0.823177	0.183729	0.725008	0.354293	0.139833	0.575693	0.90297
ItbNAC123	0	0	0	0	0	0	0	0	0	0	0	0	0	0	0
ItbNAC82	0	0	0.103944	0	0	0	0	0	0	0	0	0	0	0	0
ItbNAC122	0	0	0	0	0	0	0	0	0	0	0	0	0	0	0
ItbNAC37	0.0497984	2.04413	1.22485	2.42591	2.14254	2.39866	1.01676	1.04607	0.601144	0.758704	2.18967	0.839212	0.941634	1.00622	1.75089
ItbNAC34	101.781	42.5608	28.8606	13.0139	18.4564	52.8642	31.1876	45.7803	56.0246	47.0194	65.8958	77.5897	32.6742	77.3381	88.4692
ItbNAC90	0	0	0	0	0	0	0	0	0	0	0	0	0	0	0
ItbNAC68	0.164195	0.147861	0.412107	1.17882	0.976574	0.143899	0.0855519	0.815688	0	0.411233	0.463239	0.247762	0	0.391907	0.580142
ItbNAC75	0	0	0	0	0	0	0	0	0	0	0	0	0	0	0
ItbNAC81	4.16761	4.07418	0.0320737	0.990498	0.00110788	1.97703	11.174	2.22396	4.56438	3.17758	0.000655466	2.02451	1.8446	1.81614	2.94754
ItbNAC101	4.19505	2.44489	2.70974	1.9061	3.23109	1.28913	1.03366	5.3504	4.61464	1.37915	3.0001	1.6964	2.73697	2.82336	4.92543
ItbNAC125	0.324759	0.119181	0.675119	0.153523	0.129975	0.244007	0.482887	0.235588	0	0.194241	0.545734	0.531768	0	0.595813	0.89403
ItbNAC124	0	0	0	0	0	0	0	0	0	0	0	0	0	0	0
ItbNAC2	2.8833	1.59919	1.43694	1.23906	0.500078	1.10078	3.98636	2.30829	1.95447	1.75352	1.6084	1.1981	1.19147	1.49426	2.15334
ItbNAC15	0.00159668	0.893619	0.0552022	0.000994704	0.994535	0.0984278	0.618844	0.194747	0	0.260859	0.0967747	8.88e-06	0.104596	8.3e-05	0.602788
ItbNAC114	18.692	21.0851	11.7707	11.4851	16.5592	9.91773	13.4434	7.84647	15.9949	17.5631	12.401	13.1437	10.2242	17.8369	17.7494
ItbNAC61	2.05e-65	4.03e-10	8.41e-20	3.73e-13	6.8e-12	1.25e-33	2.64e-15	2.73e-35	1.66e-07	4.67e-15	8.81e-08	1.73e-60	6.67e-27	3.44e-28	2.76e-07
ItbNAC55	3.89759	7.28508	4.1114	1.51083	4.37462	1.34861	19.9825	4.04895	2.67332	1.6891	1.01141	8.8338	4.05423	7.48651	3.52664
ItbNAC9	3.68787	9.14451	3.66041	0.645573	7.26748	0.924401	7.25328	3.71158	0.451832	1.45488	4.15129	6.21639	2.48074	6.41213	5.3043
ItbNAC22	48.5507	103.887	47.3229	73.9842	152.866	32.4428	49.5133	62.8611	45.6591	33.7521	17.269	56.2141	44.2659	52.6318	30.691
ItbNAC67	0	0	0	0	0	0	0	0	0	0	0	0	0	0	0
ItbNAC43	19.1981	38.2349	15.4453	10.816	25.6061	10.7314	61.3936	12.6243	23.1981	18.1844	14.0938	13.607	12.7296	20.3501	18.4719
ItbNAC115	1.21483	1.0567	1.39064	0.479468	0.493989	0.658712	2.07951	1.09289	1.9083	0.557808	1.61311	1.70582	0.713633	1.50706	1.58741
ItbNAC3	274.631	199.139	50.4308	116.863	171.589	29.3878	228.22	25.9456	59.9436	23.4576	19.9408	123.05	59.2505	138.916	75.765
ItbNAC32	4.92719	3.40763	3.65562	4.37059	4.01965	3.29632	8.32829	4.25295	3.53925	3.88356	2.63921	4.04316	3.34568	4.33081	6.24433
ItbNAC8	66.8035	54.1601	33.2809	47.4432	91.1937	26.4293	124.113	32.9397	62.8173	37.7599	30.1599	38.1359	28.6437	63.5379	66.5212
ItbNAC86	4.18127	0.774016	6.48992	0.575213	0.957926	8.90033	4.38959	11.0345	10.4072	5.31811	10.325	9.12307	3.90444	5.92643	6.72487
ItbNAC78	0	0	0	0	0	0	0	0	0	0	0	0	0	0	0
ItbNAC59	0	0	0	0	0	0	0	0	0	0	0	0	0	0	0
ItbNAC102	0	0	0	0	0	0	0	0	0.0560774	0	0	0	0	0	0
ItbNAC40	0	0	0	0	0	0	0	0	0	0	0	0	0	0	0
ItbNAC73	3.57168	16.8994	5.64434	9.87032	23.8173	2.38146	2.4395	3.07411	2.74368	2.90977	2.44344	2.4266	3.12297	11.7379	5.38374
ItbNAC27	1.63897	2.38854	0.48594	0.653778	1.62075	1.22732	1.12036	1.64952	1.27762	1.13061	1.48433	1.35518	0.373585	1.80815	2.65192
ItbNAC10	3.06364	0.787005	4.07154	0.976555	0.473133	3.57143	4.89791	6.13246	8.20395	3.05629	7.0412	5.19234	3.88323	6.36854	8.14108
ItbNAC100	1.59185	0.223366	1.42308	1.67e-06	3.36e-05	0.955559	0.539257	0.818265	1.37308	0.473006	1.80805	0.761074	0.314075	1.12252	0.751587
ItbNAC131	0	0	0	0	0	0	0	0	0	0	0	0	0	0	0
ItbNAC31	0	0	0	0	0	0	0	0	0	0	0	0	0	0	0
ItbNAC18	1.56133	2.5494	3.15905	1.80303	7.85075	1.40548	8.41054	1.14462	5.73231	1.22693	2.68673	0.527611	1.31006	2.21303	5.27531
ItbNAC26	4.64142	6.75649	7.52052	10.0831	4.91863	10.2707	2.17308	5.57095	8.00104	9.87149	10.9048	6.2385	7.60237	8.44968	4.67795
ItbNAC24	0.522401	0.12384	8.44e-05	9.07e-05	7.38e-05	7e-05	0.557425	0.4176	0.482945	0.641919	0.930055	9.1e-05	0.925296	0.924994	8.54e-05
ItbNAC126	0	0	0	0	0	0	0	0	0	0	0	0	0	0	0
ItbNAC107	0.801277	0.327791	0.122187	0	0.479422	0.214969	0.136487	0.10228	0	0	0.236409	0.245201	0	0.370782	0.301529
ItbNAC35	0.893779	0.190894	0.34379	0	0.435644	0.245325	0.699412	0.300178	0.63761	0.260168	0.315703	0.41353	0.198555	0.683409	1.13071
ItbNAC91	0	0.0857297	0	0	0	0.176269	0	0	0	0	0.0928596	0	0	0	0.122098
ItbNAC64	1.58815	0.780431	0.758832	0.239032	0.217211	0.437205	0.184388	0.934919	0.722159	0.554723	0.919497	0.431686	0.309886	2.03745	1.86566
ItbNAC7	100.357	62.0031	46.8745	33.5891	142.586	25.6181	123.105	23.1172	96.8964	24.2055	21.3669	44.3634	36.576	70.9328	77.8908
ItbNAC129	0	8.15483	1.31783	0.762544	10.9928	1.24203	3.35539	1.89426	0.225059	0.925363	0.441335	3.81593	1.50266	1.44769	0.302975
ItbNAC53	0.117804	0.331974	0.844868	0.533712	0.118275	0.732987	0.12438	0.702957	0.432638	0.290206	0.867674	0.718434	0.116294	0.224341	0.849054
ItbNAC88	3.82447	1.60709	2.07005	1.02047	0.752806	2.16512	4.05085	2.85977	2.3724	2.60048	2.7393	3.25108	1.97496	3.83612	3.4549
ItbNAC83	17.1911	8.2386	5.70486	0.629982	2.45087	4.68667	47.1682	4.59879	19.6752	2.65249	3.51172	5.19596	5.89249	4.84153	9.35576
ItbNAC70	0	0	0	0	0	0	0	0	0.187296	0	0	0	0	0	0
ItbNAC95	0	0.178531	0	0.0676908	0.127922	0	0.0698302	0	0	0	0.0512067	0	0	0	0
ItbNAC28	5.94635	0.666043	1.75361	1.66444	5.72116	2.11121	1.8607	1.97361	2.80265	1.26544	2.79165	1.51615	1.27312	8.44899	5.85235
ItbNAC99	54.9628	24.2602	32.592	25.923	75.7972	25.9046	19.5255	30.0901	62.4086	27.6985	24.4934	33.5707	27.4654	67.4836	74.6285
ItbNAC17	0.532698	0.293912	0.494904	0.0933686	0.558843	0.659159	1.0107	1.42768	0.614618	0.529652	1.39598	0.323221	0.782871	0.817867	0.931294
ItbNAC62	7.74644	0.168606	1.16483	0	0.0632212	0.489081	0.392258	1.39933	1.34663	0.617758	1.65169	1.03791	0.350205	3.85816	3.05546
ItbNAC127	1.16082	2.15373	1.72971	0.858303	0.996973	1.42058	0.731727	0.938095	1.79702	1.01987	0.841048	1.01131	0.455916	2.17256	1.75927
ItbNAC110	33.3133	3.97933	1.80695	0.891724	1.93627	1.03479	2.40528	0.445277	5.53552	0.973022	1.17838	40.2049	3.18825	7.63384	12.6789
ItbNAC80	0.624027	0.00125761	0.494442	0.00229845	0.304813	0.0937311	0.645626	0.92348	0.272656	7.12e-06	0.000221111	0.105479	3.54e-06	0.741439	1.41446
ItbNAC57	0	0	0	0	0	0	0	0	0	0	0	0	0	0	0
ItbNAC118	12.4584	10.74	14.354	9.3817	12.7133	13.3011	15.5209	15.4402	15.3336	16.092	14.3699	14.0911	13.2632	17.6444	16.5234
ItbNAC60	13.543	9.61699	20.314	21.7961	10.5287	24.5926	12.0717	19.3455	17.792	33.6197	23.8686	21.4707	26.0722	11.5404	17.3307
ItbNAC108	0	0	0.232337	0	0	0	0	0	0	0	0.22547	0	0	0	0
ItbNAC33	0	0	0	0	0	0	0	0	0	0	0	0	0	0	0
ItbNAC58	0	0	0	0	0	0	0	0	0	0	0	0	0	0	0
ItbNAC130	0	0	0	0	0	0	0	0	0	0	0	0	0	0	0
ItbNAC71	46.8682	35.3415	9.35912	14.1747	5.71575	5.26257	2.32941	3.73026	6.44071	3.94333	2.19945	16.3353	8.38701	9.05071	8.89802
ItbNAC77	0.288658	0	0	0	0	0	0	0	0	0	0.233193	0	0	0	0

## Sheet: Sheet7
Supplementary file 7: FPKM value of ItfNACs under various stress
Gene name	ITF_ABAT	ITF_BABA	ITF_BAPT	ITF_BICO	ITF_BTHT	ITF_COCO	ITF_COLD	ITF_DSCO	ITF_GA3T	ITF_HEAT	ITF_HECO	ITF_HOCO	ITF_IAAT	ITF_MANN	ITF_NACL
ItfNAC41	0.282219	1.00361	0.422409	3.68e-06	5.33e-05	8.86e-06	1.55463	0.50599	1.31e-06	3.15e-06	9.57e-06	0.515131	3.45e-05	3.77e-05	4.03e-05
ItfNAC146	0.739637	0.715467	1.40437	1.79222	0.0641062	0.5067	0.591953	0.562514	0.741205	0.140069	1.08929	0.900781	1.00304	1.30271	1.20282
ItfNAC83	0	0	0	0	0	0	0	0	0	0	0	0	0	0	0
ItfNAC136	2.24497	0.484372	1.76448	0.29715	0.164436	0.640016	1.7783	0.893818	1.29066	0.522944	0.815778	0.716347	0.65878	1.27575	2.13512
ItfNAC23	1.30858	9.22952	9.11214	2.65824	5.97487	5.07385	11.5897	7.26277	3.44036	5.3616	3.92836	7.96082	6.60892	8.73945	6.44254
ItfNAC36	2.24583	0.371024	1.78111	0.491921	0.16978	1.03189	0.884134	1.26096	0.558925	0.779222	1.11097	1.66802	1.29543	1.60181	2.28828
ItfNAC56	0	0	0	0	0	0	0	0	0	0	0	0	0	0	0
ItfNAC46	11.7227	8.88374	8.22677	12.0959	15.4335	7.52375	3.54847	11.2206	7.95784	7.48548	7.54029	7.35196	6.71095	10.896	8.23881
ItfNAC100	0	0	0	0	0	0	0	0	0	0	0	0	0	0	0
ItfNAC15	100.395	99.5105	61.0307	48.3566	116.27	39.9697	64.2106	7.61668	17.9996	13.2517	15.2046	86.342	84.9281	105.276	67.1126
ItfNAC123	0	0	0	0	0	0	0	0	0	0	0	0	0	0	0
ItfNAC1	0	0	0	0	0	0	0	0	0	0	0	0	0	0	0
ItfNAC133	4.76889	8.32492	7.46205	6.40352	4.20761	5.14648	1.20563	3.87229	12.1336	3.03358	1.65464	3.70417	5.37968	1.60015	11.8204
ItfNAC42	0	0	0	0	0	0	0	0	0	0	0	0	0	0	0
ItfNAC28	231.38	96.2891	233.156	508.009	363.799	93.9599	169.589	60.9278	124.425	60.0603	54.6978	257.693	251.427	317.794	317.738
ItfNAC142	0	0	0	0	0	0	0.133007	0	0	0	0	0	0	0	0
ItfNAC117	60.8866	0.366623	4.10083	2.3113	1.89972	18.2531	5.81264	2.71217	12.0611	9.5253	10.2875	22.313	30.7223	36.1745	12.7784
ItfNAC88	4.47059	0.482254	0.253777	1.41346	0.803833	1.48859	0.120374	0.754773	0.413255	0.923147	0.919134	0.543474	1.20816	3.53435	1.7369
ItfNAC67	1.03828	10.0109	2.75016	0.57921	0.536777	1.20267	8.10026	0.626263	0.750294	0.495878	0.558601	1.299	1.30546	4.18906	0.188568
ItfNAC120	77.1634	56.1368	75.3952	33.1412	56.174	45.3584	13.4187	40.7808	79.6597	28.0543	34.9191	50.467	46.0056	78.5081	86.4241
ItfNAC92	1.56622	1.31286	4.19385	1.3315	2.21361	1.48264	0.28301	1.8438	1.39469	0.809394	0.834608	0.958519	1.21924	1.65626	0.966901
ItfNAC58	42.4308	499.213	50.1711	45.1876	34.6886	38.4028	76.0722	39.4335	49.9014	26.7343	33.8037	49.9832	48.981	34.9221	53.0313
ItfNAC54	23.6096	96.9471	30.3422	13.8974	20.4015	17.9135	46.2647	12.3397	32.4019	16.7679	14.6329	28.7755	29.2873	24.1423	19.6458
ItfNAC144	0	0	0	0	0	0	0	0	0	0	0	0	0	0	0
ItfNAC106	11.0918	170.536	3.98844	1.02657	2.40226	4.29017	12.1406	1.74041	13.6595	2.50537	2.36555	5.47296	7.60369	5.78878	12.9721
ItfNAC5	0	0	0	0	0	0	0	0	0	0	0	0	0	0	0
ItfNAC4	0	0	0	0	0	0	0	0	0	0	0	0	0	0	0
ItfNAC127	2.80487	0.783414	4.33227	1.11184	2.00453	3.8359	1.21428	1.66885	1.54996	1.7187	3.13328	3.65466	2.7512	1.57015	3.22329
ItfNAC101	13.8029	2.6554	6.62319	10.5665	18.7373	18.9928	3.42921	15.9838	16.4763	13.7393	26.343	14.8167	6.19755	19.3339	17.3579
ItfNAC70	0	0	0	0	0	0	0	0	0	0	0	0	0	0	0
ItfNAC111	2.46678	0.0739185	1.94775	0.680345	0.401817	0.57297	0.135601	0.797497	1.44327	1.03392	0.380606	1.36472	0.548625	0.692896	1.01005
ItfNAC3	2.03166	0.130228	2.66027	0.321978	0	0.955803	0.454101	1.26589	0.547487	0.581602	0.958558	0.812044	0.874902	0.495782	1.22007
ItfNAC38	0.143204	0.225706	0	0	0	0	0	0	0	0.138891	0	0	0	0	0
ItfNAC108	4.51671	0.491838	4.78332	0.638603	0.935795	2.01592	0.755327	3.79231	3.69737	2.34409	2.20971	4.59246	4.32845	1.34097	1.82726
ItfNAC50	0	0	0	0	0	0	0	0	0	0	0	0	0	0	0
ItfNAC119	0	1.89974	0.157338	0	0	0	0	0	0.057498	0	0.0930479	0	0	0	0
ItfNAC72	4.58841	10.6721	6.38359	0.00175157	18.5846	9.45619	5.03069	7.48284	11.0396	8.8408	4.88766	5.2595	6.47357	3.84919	9.73966
ItfNAC141	0	0.199949	0	0	0.177374	0	0	0	0	0	0	0	0	0	0
ItfNAC105	0	0	0	0	0	0	0	0	0	0	0	0	0	0	0.104435
ItfNAC2	0	0	0	0	0	0	0	0	0	0	0	0	0	0	0
ItfNAC52	0	0	0	0	0	0	0	0	0	0	0	0	0	0	0
ItfNAC26	0	0.112432	0	0	0	0	0.855486	0	0	0	0	0	0	0.176739	0.149589
ItfNAC78	0	0	0	0	0	0	0	0	0	0	0	0	0	0	0
ItfNAC8	0	0	0	0	0	0	0	0	0	0	0	0	0	0	0
ItfNAC107	0.209899	26.4974	0.853251	1.94205	0.863827	1.07535	1.42219	1.16804	1.74657	1.70353	1.34148	0.516816	0.33664	1.77251	0.440446
ItfNAC131	0	0	0	0	0	0	0	0	0	0	0	0	0	0	0
ItfNAC91	0	0	0	0	0	0	0	0	0	0	0	0	0	0	0
ItfNAC61	0.842687	0.168842	0.604742	0.0797375	0.0417552	0.591233	0.832331	0.64704	0.716154	0.123154	0.534841	0.355428	0.317675	0.446547	0.684619
ItfNAC94	0	0	0	0	0	0	0	0	0	0	0	0	0	0	0
ItfNAC151	1.29858	1.16884	3.17034	6.13949	3.71377	3.0563	3.26976	2.388	3.37808	2.01593	3.65856	3.10778	3.6239	2.01476	2.40028
ItfNAC33	23.0144	140.952	223.877	69.0933	90.8071	32.7283	38.8807	48.7037	86.1519	45.3524	41.3372	76.7688	79.9516	31.6375	28.8714
ItfNAC110	0.234465	0.198521	0.330685	0	0.215609	0.501337	0.482961	0.180421	0.405166	0.166407	0.282572	0.0767724	0.344271	0.105804	0.258173
ItfNAC31	12.2629	1.82352	0.634211	0.356897	0.186241	1.12008	1.66528	0.537393	0.389085	0.0684708	0.562742	1.10192	1.00582	2.35209	2.98967
ItfNAC21	33.4129	110.967	31.2365	57.0881	28.1117	21.4801	64.4953	15.5041	43.0603	11.8709	12.7696	23.9139	25.2111	79.9108	64.7467
ItfNAC39	2.23793	0.176666	1.98322	0.882921	0	0.225318	0.330244	1.46747	1.03153	0.9188	0.258581	1.84334	0.733133	0	2.16958
ItfNAC19	1.51116	0.144422	0.960606	0.358804	0.245391	0.662091	0	0.507568	0.405984	0.373697	0.218062	1.22826	0.480329	1.61067	0.579963
ItfNAC68	30.6291	3.29707	46.6174	6.66142	13.4198	30.6447	23.9502	1.43604	14.7969	8.44711	3.27234	30.5344	46.631	44.6511	63.3786
ItfNAC24	2.03427	0.24702	1.6759	0.405355	0.124387	1.5274	1.7023	2.28891	3.272	0.817095	1.37364	1.7734	1.36585	1.12203	1.60661
ItfNAC82	0	0	0	0	0	0	0	0	0	0	0	0	0	0.0763651	0.0650935
ItfNAC90	18.8754	7.5393	16.1712	0.797463	15.7611	4.43305	0.614981	2.00443	9.61214	6.56395	3.36762	19.1824	21.5197	9.64046	14.0901
ItfNAC66	128.128	330.591	165.57	211.943	310.662	151.189	870.606	122.476	178.62	107.048	107.45	194.442	196.969	188.585	214.011
ItfNAC71	10.3166	6.94098	10.3249	21.0717	8.70918	25.7343	6.69467	16.2296	19.2186	29.6526	26.5697	21.2779	20.6184	10.6643	11.6279
ItfNAC75	2.46e-05	4.42e-05	5.35e-06	0.556123	0.420932	0.000231566	1.09e-05	0.481673	0.000140512	1.26e-05	0.00034455	1.27e-05	0.00284828	4.89942	1.01107
ItfNAC137	0	0	0	0	0	0	0	0	0	0	0	0	0	0	0
ItfNAC112	0	0	0	0	0	0	0	0	0	0	0	0	0	0	0
ItfNAC17	25.4732	131.289	33.7166	27.8141	36.0958	27.6503	74.0643	25.2032	29.1566	21.0825	22.7851	28.8868	30.4157	33.9167	27.2489
ItfNAC143	0	0	0	0	0	0	0	0	0	0	0	0	0	0	0
ItfNAC97	0	0	0	0	0	0	0	0	0	0	0	0	0	0	0
ItfNAC40	4.8924	1.16968	0.683017	1.70691	0.604569	1.15805	1.03633	1.06213	0.450819	0.57438	1.48405	0.678902	1.11109	5.11859	2.21383
ItfNAC32	0.79253	0.192362	0.244935	0	0.220541	0.0808829	1.18698	0.0901264	0.0588373	0.0809252	0.0927372	0.0785111	0.0865898	0.484972	0.424521
ItfNAC48	35.1201	66.6571	10.9244	6.62511	8.72203	19.1819	7.12616	14.5579	10.6659	13.1513	17.6261	16.3585	9.63809	79.9594	68.9701
ItfNAC73	5.76969	0.643151	2.04834	0.150406	0.161583	0.833552	0.877814	0.31825	1.07129	0.865266	1.16046	1.0858	2.61657	3.04588	3.45453
ItfNAC128	0	0	0	0	0	0	0.211054	0	0	0	0	0	0	0	0
ItfNAC102	4.56297	189.816	13.3935	45.5071	17.1908	4.46864	5.3159	9.85104	2.2675	4.14929	6.55491	5.80792	4.36581	6.59307	5.0344
ItfNAC57	0	0	0	0	0	0	0	0	0	0	0	0	0	0	0
ItfNAC80	0	0	0	0	0	0	0	0	0	0	0	0	0	0	0
ItfNAC130	17.0373	12.8657	1.83296	0.547414	0.965481	1.10878	0.402117	0.614427	2.4083	1.12487	1.42963	3.07493	1.72272	12.7735	20.3044
ItfNAC149	0	0	0	0	0	0	0	0	0	0	0	0	0	0	0
ItfNAC135	19.2394	52.0157	15.8218	13.4998	13.7857	22.3592	3.46279	21.6533	17.9563	17.3494	17.4416	9.38805	18.7303	26.301	18.3883
ItfNAC16	0.943779	2.98237	1.83498	1.83032	1.58636	1.03357	1.35981	2.12461	0.77864	1.11596	1.30863	1.42287	2.57621	2.13622	0.246007
ItfNAC98	0	0	0	0	0	0	0	0	0	0	0	0	0	0	0
ItfNAC87	0.156609	0	0	0	0.108616	0.322564	0	0.174148	0.0586048	0.0797154	0.904988	0.0751414	0.160683	0.0947301	0.255235
ItfNAC25	0	0	0.0981973	0	0	0	0.146767	0	0	0	0	0	0	0	0.436248
ItfNAC93	13.5429	26.2652	16.8209	16.7619	19.0019	16.284	31.5281	14.9042	18.1506	12.1872	12.1375	20.5465	18.0519	19.8105	21.6566
ItfNAC64	0.283064	3.10853	2.81113	2.48323	2.1196	2.46027	15.4595	2.05874	3.50856	2.38575	4.03145	5.27999	3.64838	0.921004	0.934934
ItfNAC96	0	0	0	0	0	0	0	0	0	0	0	0	0	0	0
ItfNAC62	61.6957	165.355	4.26631	163.663	41.0448	3.33241	40.5162	4.43944	1.6935	1.61777	1.25957	4.24276	1.3482	196.007	172.131
ItfNAC69	0.090281	0	0	0	0	0	0	0	0	0	0	0	0	0	0
ItfNAC86	0	0	0	0	0	0	0	0	0	0	0	0	0	0	0
ItfNAC59	4.64318	208.43	25.8237	0.358899	1.95046	0.497369	92.6795	1.75569	14.3281	0.13766	0.982184	5.53782	3.0408	0.777261	16.0179
ItfNAC27	1.02288	0	1.80005	0	0	0.441539	0.375387	0	0.186845	0.169406	0.103311	0.16263	0.448484	0.433138	0.0912828
ItfNAC53	0.845988	0.170691	1.14041	1.7e-06	0.198512	0.760476	1.00079	0.406972	0.680976	0.523049	0.0990813	0.806761	0.593187	0.462067	0.468474
ItfNAC76	0	0	0	0	0	0	0.126697	0	0	0	0	0	0	0	0
ItfNAC13	0.394207	0.0627859	0.308927	0	0	0.321763	0.213647	0.0869857	0.057075	0	0	0.218378	0	0	0.16868
ItfNAC51	0	0	0	0	0	0	0	0	0	0	0	0	0	0	0
ItfNAC30	0.972787	7.00406	6.05112	2.29832	3.95691	1.14126	2.72932	1.08972	3.70663	0.473335	0.257326	0.621627	0.665846	0.424035	2.01208
ItfNAC132	1.28128	0.333868	1.22646	0.211899	0	0.952683	0.924438	1.31389	1.00131	0.42707	0.991879	1.27185	1.51699	0.528782	1.14632
ItfNAC9	104.899	231.465	133.448	159.724	247.194	127.82	572.964	91.8241	128.656	86.7437	87.6952	148.227	165.7	144.678	177.519
ItfNAC89	0	0	0	0	0	0	0	0	0	0	0	0	0	0	0
ItfNAC116	0.169827	0.145071	0	0.215527	0	0	0.125214	0	0	0	0	0	0	0	0.0878053
ItfNAC79	0	0	0	0	0	0	0	0	0	0	0	0	0	0	0.222374
ItfNAC37	26.6045	399.428	96.9696	48.9277	57.4129	5.71402	195.817	35.8027	28.8876	6.13031	6.44894	21.2896	24.099	20.4052	32.4201
ItfNAC139	65.2549	62.5337	103.158	30.5062	24.9936	83.3192	29.9186	82.8001	121.822	82.2944	92.9255	117.922	138.194	109.968	89.0096
ItfNAC103	0.859412	0.173374	2.38013	0	0.434378	0.190675	1.25576	2.0981	0.421944	0.337764	0.510487	0.643739	0.232631	0.8023	1.04488
ItfNAC124	0.31178	3.67e-11	0.248453	0.0834299	0	0.0654635	0	0.144493	8.98e-12	0	0.0753702	0.190378	0.269983	0.235909	0.469806
ItfNAC145	0	0	0	0	0	0	0	0	0	0	0	0	0	0	0
ItfNAC122	5.43753	0.849102	2.09025	2.68882	3.97948	3.80862	0.397422	6.02274	3.982	1.65079	4.02964	2.67994	2.57443	5.25809	3.98517
ItfNAC22	46.4269	87.969	53.5113	60.2261	78.1067	47.5497	85.5152	55.3339	63.4021	33.1601	39.0857	38.0703	34.9345	79.108	71.1199
ItfNAC43	0	0	0	0	0	0	0	0	0	0	0	0	0	0	0
ItfNAC125	25.2935	2.7249	6.55763	43.845	10.0478	35.9097	6.00747	21.2926	14.9198	34.4687	32.5053	29.8278	38.9449	28.9113	25.059
ItfNAC147	0	0	0.758536	0.481445	0.338909	0.875789	0	0.828185	0.348842	0.122965	2.16622	0.695714	0.129796	0.923558	0.261418
ItfNAC118	0	0	0	0	0	0	0	0	0	0	0	0	0	0	0
ItfNAC34	2.58772	0.425057	3.25866	0.8913	0.269843	1.10154	0.000160296	2.93324	0.599457	0.000113967	1.52558	1.83967	1.17213	1.37726	3.48259
ItfNAC14	2.29713	0.876156	1.47275	2.39878	4.40192	3.4376	3.37297	2.85957	1.49136	2.45671	3.67968	1.7581	1.88124	6.59192	2.97145
ItfNAC65	0.995321	0	0.608965	0	0.124685	0.845252	0.374816	0.905206	0.136482	0.18419	0.643114	1.74143	0.661874	0.814596	1.19151
ItfNAC84	0	0	0	0	0	0	0	0	0	0	0	0	0	0	0
ItfNAC74	3.52023	276.059	28.457	22.2333	44.9927	6.86691	18.2432	6.05235	25.8796	7.00224	4.65657	14.0316	16.2514	6.81027	6.22257
ItfNAC148	0.283619	12.3923	2.06908	4.09645	5.55889	1.84921	8.28623	3.37047	1.42622	1.75753	2.24493	1.90745	2.40146	0.608656	0.397489
ItfNAC63	0.385123	0.623401	1.61392	0	0.973427	0.859086	0.326565	0.342019	0.492949	0.556883	0.181019	1.66363	1.75141	1.04254	0.920023
ItfNAC20	13.2503	0.74664	4.60399	8.44231	5.20953	3.45205	2.55219	1.60933	3.73941	2.30572	3.60033	6.78657	7.12914	7.6092	9.51133
ItfNAC95	1.05464	0.139309	0.626354	0.588234	0.242657	1.16603	0.626563	1.85761	2.78965	0.532828	1.02599	2.43778	1.48633	0.894893	0.56816
ItfNAC104	2.107	6.63114	0.0200082	0.00615637	1.74539	0.000352398	1.11161	0.000974049	0.892168	1.11378	0.0005896	0.000100218	0.113554	3.45475	2.32737
ItfNAC49	1.54616	0.0662614	1.01829	0.112607	0	0	0.364002	0.373678	1.07379	0.170494	0.29615	1.84201	0.878961	0.106422	0.64214
ItfNAC140	13.3525	24.3439	13.2836	6.00418	12.3615	10.3398	12.5602	12.6563	16.1637	8.16438	12.7301	14.7611	12.8463	7.35074	8.71225
ItfNAC85	0	0	0	0	0	0	0	0	0	0	0	0	0	0	0
ItfNAC121	0.830374	0	0.732501	0	0	0.836832	0	0.392556	0.520162	0	0.550667	0.11819	0	0.60022	0.880597
ItfNAC29	3.46887	0.449481	0.393958	4.20986	5.50743	1.65099	0.387599	0.181596	0.234105	0.110576	0.324365	0.264329	0.175003	3.4502	4.19948
ItfNAC77	0	0	0	0	0	0	0.106007	0	0	0.076739	0	0	0	0	0
ItfNAC55	15.9178	18.4122	6.37106	4.47016	9.38306	1.33928	6.64084	0.898309	11.5573	1.52448	0.740726	9.97585	14.1101	8.88467	6.9393
ItfNAC109	0	0	0	0	0	0	0	0	0	0	0	0	0	0	0
ItfNAC129	0	0	0	0	0	0	0	0	0	0	0	0	0	0	0
ItfNAC113	0	0	0	0	0	0	0	0	0	0	0	0	0	0	0
ItfNAC47	1.89592	0.878523	1.85924	1.71613	1.646	1.25601	2.96225	2.19023	0.642509	0.930235	1.14121	0.969499	0.782904	0.817127	1.67485
ItfNAC18	11.791	23.5972	21.5119	13.1992	20.2025	15.6802	5.73611	12.3894	19.9588	16.9492	13.7483	20.9075	23.6284	7.95073	10.9209
ItfNAC99	0	0	0	0	0	0	0	0	0	0	0	0	0	0	0
ItfNAC114	2.85472	0.0613891	0.945644	0	0	1.73635	0.201855	5.50709	5.55105	0.573844	1.52148	4.35941	1.82669	1.34156	0.974127
ItfNAC44	5.80898	6.14874	6.55992	2.455	5.76998	2.58435	6.98879	4.2625	4.16391	4.29792	2.33146	3.39736	3.33984	3.92081	3.60751
ItfNAC134	136.052	945.064	270.132	273.795	403.361	32.0285	774.604	92.4862	208.8	23.9241	21.1553	119.644	90.8092	109.325	195.598
ItfNAC150	0	0	0	0	0	0	0	0	0	0	0	0	0	0	0
ItfNAC60	14.9239	15.0623	21.4875	1.78335	11.9975	7.26572	9.95868	5.86134	19.4009	13.1417	4.26333	15.4216	15.9092	12.2343	13.3166
ItfNAC81	0	0	0	0	0	0	0	0	0	0	0	0	0	0	0
ItfNAC6	0	0.532779	0	0	0	0	0	0	0	0	0	0	0	0	0
ItfNAC126	0	0	0.0957549	0.127746	0	0	0	0	0	0	0.121102	0	0	0.242615	0.328754
ItfNAC115	10.4069	11.6522	11.4888	14.0766	9.11384	12.213	5.81487	8.77457	10.734	8.99763	8.15798	12.0152	11.7923	14.1107	14.9839
